# Supplementary material for: Genome-wide characterization and expression analysis of bHLH gene family in physic nut (Jatropha curcas L.)
Source: PeerJ. 2022 Aug 9;10:e13786. doi: 10.7717/peerj.13786 (PMC9373979; doi:10.7717/peerj.13786)
Supplement: Supplemental Information 3 [file peerj-10-13786-s003.xlsx]

## Sheet: Sheet1
Table S2. The bHLH protein sequences of Arabidopsis and Rice
Gene ID	Protein sequences
AT1G01260	MNIGRLVWNEDDKAIVASLLGKRALDYLLSNSVSNANLLMTLGSDENLQNKLSDLVERPNASNFSWNYAIFWQISRSKAGDLVLCWGDGYCREPKEGEKSEIVRILSMGREEETHQTMRKRVLQKLHDLFGGSEEENCALGLDRVTDTEMFLLSSMYFSFPRGEGGPGKCFASAKPVWLSDVVNSGSDYCVRSFLAKSAGIQTVVLVPTDLGVVELGSTSCLPESEDSILSIRSLFTSSLPPVRAVALPVTVAEKIDDNRTKIFGKDLHNSGFLQHHQHHQQQQQQPPQQQQHRQFREKLTVRKMDDRAPKRLDAYPNNGNRFMFSNPGTNNNTLLSPTWVQPENYTRPINVKEVPSTDEFKFLPLQQSSQRLLPPAQMQIDFSAASSRASENNSDGEG…
AT1G02340	MSNNQAFMELGWRNDVGSLAVKDQGMMSERARSDEDRLINGLKWGYGYFDHDQTDNYLQIVPEIHKEVENAKEDLLVVVPDEHSETDDHHHIKDFSERSDHRFYLRNKHENPKKRRIQVLSSDDESEEFTREVPSVTRKGSKRRRRDEKMSNKMRKLQQLVPNCHKTDKVSVLDKTIEYMKNLQLQLQMMSTVGVNPYFLPATLGFGMHNHMLTAMASAHGLNPANHMMPSPLIPALNWPLPPFTNISFPHSSSQSLFLTTSSPASSPQSLHGLVPYFPSFLDFSSHAMRRL
AT1G03040	MANNNNIPHDSISDPSPTDDFFEQILGLSNFSGSSGSGLSGIGGVGPPPMMLQLGSGNEGNHNHMGAIGGGGPVGFHNQMFPLGLSLDQGKGHGFLKPDETGKRFQDDVLDNRCSSMKPIFHGQPMSQPAPPMPHQQSTIRPRVRARRGQATDPHSIAERLRRERIAERIRSLQELVPTVNKTDRAAMIDEIVDYVKFLRLQVKVLSMSRLGGAGAVAPLVTEMPLSSSVEDETQAVWEKWSNDGTERQVAKLMEENVGAAMQLLQSKALCIMPISLAMAIYHSQPPDTSSSIVKPEMNPPP
AT1G05710	MEFSRDAGMMMENKRNVCSLGESSIKRHKSDLSFSSKERKDKVGERISALQQIVSPYGKTDTASVLLDAMHYIEFLHEQVKVCSSIPSMIHSSLSEFPCSFVQVLSAPYLQTVPDATQEELEQYSLRNRGLCLVPMENTVGVAQSNGADIWAPVKTPLSPAFSVTSQSPFR
AT1G05805	MYQSSSSTSSSSQRSSLPGGGGLIRYGSAPGSFLNSVVDEVIGGGSSNARDFTGYQPSSDNFIGNFFTGAADSSSLRSDSTTCGVNNSSDGQKQLGNNNNNNSNKDIFLDRSYGGFNEISQQHKSNDIGGGNSSGSYSLARQRSSPADFFTYLASDKNNFSLNQPTSDYSPQGGSNGGRGHSRLKSQLSFTNHDSLARINEVNETPVHDGSGHSFSAASFGAATTDSWDDGSGSIGFTVTRPSKRSKDMDSGLFSQYSLPSDTSMNYMDNFMQLPEDSVPCKIRAKRGCATHPRSIAERERRTRISGKLKKLQDLVPNMDKQTSYSDMLDLAVQHIKGLQHQLQNLKKDQENCTCGCSEKPS
AT1G06170	MGGGGMFEEIGCFDPNAPAEMTAESSFSPSEPPPTITVIGSNSNSNCSLEDLSAFHLSPQDSSLPASASAYAHQLHINATPNCDHQFQSSMHQTLQDPSYAQQSNHWDNGYQDFVNLGPNHTTPDLLSLLQLPRSSLPPFANPSIQDIIMTTSSSVAAYDPLFHLNFPLQPPNGSFMGVDQDQTETNQGVNLMYDEENNNLDDGLNRKGRGSKKRKIFPTERERRVHFKDRFGDLKNLIPNPTKNDRASIVGEAIDYIKELLRTIDEFKLLVEKKRVKQRNREGDDVVDENFKAQSEVVEQCLINKKNNALRCSWLKRKSKFTDVDVRIIDDEVTIKIVQKKKINCLLFVSKVVDQLELDLHHVAGAQIGEHHSFLFNAKISEGSSVYASAIADRVMEV…
AT1G09250	MVESLFPSIENTGESSRRKKPRISETAEAEIEARRVNEESLKRWKTNRVQQIYACKLVEALRRVRQRSSTTSNNETDKLVSGAAREIRDTADRVLAASARGTTRWSRAILASRVRAKLKKHRKAKKSTGNCKSRKGLTETNRIKLPAVERKLKILGRLVPGCRKVSVPNLLDEATDYIAALEMQVRAMEALAELLTAAAPRTTLTGT
AT1G09530	MPLFELFRLTKAKLESAQDRNPSPPVDEVVELVWENGQISTQSQSSRSRNIPPPQANSSRAREIGNGSKTTMVDEIPMSVPSLMTGLSQDDDFVPWLNHHPSLDGYCSDFLRDVSSPVTVNEQESDMAVNQTAFPLFQRRKDGNESAPAASSSQYNGFQSHSLYGSDRARDLPSQQTNPDRFTQTQEPLITSNKPSLVNFSHFLRPATFAKTTNNNLHDTKEKSPQSPPNVFQTRVLGAKDSEDKVLNESVASATPKDNQKACLISEDSCRKDQESEKAVVCSSVGSGNSLDGPSESPSLSLKRKHSNIQDIDCHSEDVEEESGDGRKEAGPSRTGLGSKRSRSAEVHNLSERRRRDRINEKMRALQELIPNCNKVDKASMLDEAIEYLKSLQLQVQIM…
AT1G10120	MGGESNEGGEMGFKHGDDESGGISRVGITSMPLYAKADPFFSSADWDPVVNAAAAGFSSSHYHPSMAMDNPGMSCFSHYQPGSVSGFAADMPASLLPFGDCGGGQIGHFLGSDKKGERLIRAGESSHEDHHQVSDDAVLGASPVGKRRLPEAESQWNKKAVEEFQEDPQRGNDQSQKKHKNDQSKETVNKESSQSEEAPKENYIHMRARRGQATNSHSLAERVRREKISERMRLLQELVPGCNKITGKAVMLDEIINYVQSLQQQVEFLSMKLATVNPEINIDIDRILAKDLLQSRDRNTPTLGLNPFAGFQGNIPNLSATTNPQYNPLPQTTLESELQNLYQMGFVSNPSTMSSFSPNGRLKPEL
AT1G10610	MMMMRGGERVKEFLRPFVDSRTWDLCVIWKLGDDPSRFIEWVGCCCSGCYIDKNIKLENSEEGGTGRKKKASFCRDDHNKHRIRTLACEALSRFPLFMPLYPGIHGEVVMSKSPKWLVNSGSKMEMFSTRVLVPVSDGLVELFAFDMRPFDESMVHLIMSRCTTFFEPFPEQRLQFRIIPRAEESMSSGVNLSVEGGGSSSVSNPSSETQNLFGNYPNASCVEILREEQTPCLIMNKEKDVVVQNANDSKANKKLLPTENFKSKNLHSERKRRERINQAMYGLRAVVPKITKLNKIGIFSDAVDYINELLVEKQKLEDELKGINEMECKEIAAEEQSAIADPEAERVSSKSNKRVKKNEVKIEVHETGERDFLIRVVQEHKQDGFKRLIEAVDLCELEI…
AT1G12860	MNSDGVWLDGSGESPEVNNGEAASWVRNPDEDWFNNPPPPQHTNQNDFRFNGGFPLNPSENLLLLLQQSIDSSSSSSPLLHPFTLDAASQQQQQQQQQQEQSFLATKACIVSLLNVPTINNNTFDDFGFDSGFLGQQFHGNHQSPNSMNFTGLNHSVPDFLPAPENSSGSCGLSPLFSNRAKVLKPLQVMASSGSQPTLFQKRAAMRQSSSSKMCNSESSSEMRKSSYEREIDDTSTGIIDISGLNYESDDHNTNNNKGKKKGMPAKNLMAERRRRKKLNDRLYMLRSVVPKISKMDRASILGDAIDYLKELLQRINDLHTELESTPPSSSSLHPLTPTPQTLSYRVKEELCPSSSLPSPKGQQPRVEVRLREGKAVNIHMFCGRRPGLLLSTMRALDN…
AT1G18400	MANFENLSSDFQTIAMDIYSSITQAADLNNNNSNLHFQTFHPSSTSLESLFLHHHQQQLLHFPGNSPDSSNNFSSTSSFLHSDHNIVDETKKRKALLPTLSSSETSGVSDNTNVIATETGSLRRGKRLKKKKEEEDEKEREVVHVRARRGQATDSHSLAERVRRGKINERLRCLQDMVPGCYKAMGMATMLDEIINYVQSLQNQVEFLSMKLTAASSFYDFNSETDAVDSMQRAKARETVEMGRQTRDGSPVFHLSTWSL
AT1G22380	MGSRFVSNEQKPHVVCVPYPAQGHINPMMKVAKLLHVKGFHVTFVNTVYNHNRLLRSRGANALDGLPSFQFESIPDGLPETGVDATQDIPALSESTTKNCLVPFKKLLQRIVTREDVPPVSCIVSDGSMSFTLDVAEELGVPEIHFWTTSACGFMAYLHFYLFIEKGLCPVKDASCLTKEYLDTVIDWIPSMNNVKLKDIPSFIRTTNPNDIMLNFVVREACRTKRASAIILNTFDDLEHDIIQSMQSILPPVYPIGPLHLLVNREIEEDSEIGRMGSNLWKEETECLGWLNTKSRNSVVYVNFGSITIMTTAQLLEFAWGLAATGKEFLWVMRPDSVAGEEAVIPKEFLAETADRRMLTSWCPQEKVLSHPAVGGFLTHCGWNSTLESLSCGVPMVCW…
AT5G64340	MPLDKRQRDLPLGLSPQACFKDIVGRSVLPRIPLPELGKLYAAKLQARCLQPPPFQSLLCSHDKESYGKRFSRSDMRSWCAAATTTTTPLGALESSQKRLLIFDQSGDQTRLLQCPFPLRFPSHAAAEPVKLSELQGIEKAFKEDGEEFHKSDGTESEMHEDTEEINALLYSDDDYDDDCESDDEVMSTGHSPYPNEGVCNKRELEEIDGPCKRQKLLDKVNNISDLSSLVGTESSTQLNGSSFLKDKKLPESKTISTKEDTGSGLSNEQSKKDKIRTALKILESVVPGAKGNEALLLLDEAIDYLKLLKRDLISTEVKNQSSTTHKSPILLLKETTWGTRNLQTDKA
AT5G65320	MMFQQDYPHGFSLVETSLSYEMLDYFQNIVVSNSEDVASQQNSISSSSYSSATLSCSITEQKSHLTEKLSPLRERYGCGDFLSRKRRRRSEKTIVDKENQRMNHIAVERNRRKQMNHFLSILKSMMPLSYSQPNDQASIIEGTISYLKKLEQRLQSLEAQLKATKLNQSPNIFSDFFMFPQYSTATATATATASSSSSSHHHHKRLEVVADVEVTMVERHANIKVLTKTQPRLLFKIINEFNSLGLSTLHLNLTTSKDMSLFTFSVKVEADCQLTPSGNEVANTVHEVVRRVHKER
AT5G65640	MELSTQMNVFEELLVPTKQETTDNNINNLSFNGGFDHHHHQFFPNGYNIDYLCFNNEEEDENTLLYPSSFMDLISQPPPLLLHQPPPLQPLSPPLSSSATAGATFDYPFLEALQEIIDSSSSSPPLILQNGQEENFNNPMSYPSPLMESDQSKSFSVGYCGGETNKKKSKKLEGQPSKNLMAERRRRKRLNDRLSMLRSIVPKISKMDRTSILGDAIDYMKELLDKINKLQDEEQELGNSNNSHHSKLFGDLKDLNANEPLVRNSPKFEIDRRDEDTRVDICCSPKPGLLLSTVNTLETLGLEIEQCVISCFSDFSLQASCSEGAEQRDFITSEDIKQALFRNAGYGGSCL
AT1G22490	MPLEAVVYPQDPFGYLSNCKDFMFHDLYSQEEFVAQDTKNNIDKLGHEQSFVEQGKEDDHQWRDYHQYPLLIPSLGEELGLTAIDVESHPPPQHRRKRRRTRNCKNKEEIENQRMTHIAVERNRRKQMNEYLAVLRSLMPSSYAQRGDQASIVGGAINYVKELEHILQSMEPKRTRTHDPKGDKTSTSSLVGPFTDFFSFPQYSTKSSSDVPESSSSPAEIEVTVAESHANIKIMTKKKPRQLLKLITSLQSLRLTLLHLNVTTLHNSILYSISVRVEEGSQLNTVDDIATALNQTIRRIQEET
AT1G25310	MNKDEVFLRQWFEILYSLTNPEANSDLRRINNEKGVEKVGQKRSAESRREGKKKRVKTQCVIKSSDKSDHDTLLKKKRRERIRRQLETLKEITPNCPQSDINAILDCVIEYTNNLRLAHYKGSQGICDDWRLFTEAGAVLYYIDT
AT1G25330	MARFEPYNYNNGHDPFFAHINQNPELINLDLPASTPSSFMLFSNGALVDANHNNSHFFPNLLHGNTRRKGNKEESGSKRRRKRSEEEEAMNGDETQKPKDVVHVRAKRGQATDSHSLAERVRREKINERLKCLQDLVPGCYKAMGMAVMLDVIIDYVRSLQNQIEFLSMKLSAASACYDLNSLDIEPTDIFQGGNIHSAAEMERILRESVGTQPPNFSSTLPF
AT1G26260	MSDKDEFAAKKKDLVNTPVDLYPPENPMLGPSPMMDSFRETLWHDGGFNVHTDADTSFRGNNNIDIPLEMGWNMAQFPADSGFIERAAKFSFFGCGEMMMNQQQSSLGVPDSTGLFLQDTQIPSGSKLDNGPLTDASKLVKERSINNVSEDSQSSGGNGHDDAKCGQTSSKGFSSKKRKRIGKDCEEEEDKKQKDEQSPTSNANKTNSEKQPSDSLKDGYIHMRARRGQATNSHSLAERVRREKISERMKFLQDLVPGCDKVTGKAVMLDEIINYVQSLQCQIEFLSMKLSAVNPVLDFNLESLLAKDALQSSAPTFPHNMSMLYPPVSYLSQTGFMQPNISSMSLLSGGLKRQETHGYESDHHNLVHMNHETGTAPDHEDTTADMKVEP
AT1G27660	MDSANLHQLQDQLQLVGSSSSSSSLDNNSDPSCYGASSAHQWSPGGISLNSVSLSHNYNNEMLNTRAHNNNNNNNTSECMSLSSIHNHSLIQQQDFPLQWPHDQSSYQHHEGLLKIKEELSSSTISDHQEGISKFTDMLNSPVITNYLKINEHKDYTEKLLLKSMSSGFPINGDYGSSLPSSSSSSSPSSQSHRGNFSQIYPSVNISSLSESRKMSMDDMSNISRPFDINMQVFDGRLFEGNVLVPPFNAQEISSLGMSRGSLPSFGLPFHHHLQQTLPHLSSSPTHQMEMFSNEPQTSEGKRHNFLMATKAGENASKKPRVESRSSCPPFKVRKEKLGDRIAALQQLVSPFGKTDTASVLMEAIGYIKFLQSQIETLSVPYMRASRNRPGKASQLVSQ…
AT1G29950	MQNNQFPHFSDEVGDRNMHNPYASGSSYDALFPPCAKLPYHGVELQPSAVCPKNFVIFDQTYDRSQVMYHPELTHKLMNTPSLNNLASTFQNEYVGGSYGNYGNYEQEVSSSYQEDPNEIDALLSADEDYEENDDNEGEEDGGDSEEVSTARTSSRDYGNTTAESCCSSYGYNNNNNNNSRKQSLSGSASSSNNDGKGRKKMKKMMGVLRRIVPGGEQMNTACVLDEAVQYLKSLKIEAQKLGVGHFSNQS
AT1G31050	MLREECTPSSSWWEDVQHHHNDHANSISSTSFYHKSSNNNSHANASCEEDNLSVSTVRASNRLDLTAESSNHHSLSASNQPASSSDELLRDHVVSSHNHLWSLAFLPGRSLGDQMMDHHHHIASRNSSTTSELPSFEPACHNGNGNGWIYDPNQVRYDQSSDQRLSKLTDLVGKHWSIAPPNNPDMNHNLHHHFDHDHSQNDDISMYRQALEVKNEEDLCYNNGSSGGGSLFHDPIESSRSFLDIRLSRPLTDINPSFKPCFKALNVSEFNKKEHQTASLAAVRLGTTNAGKKKRCEEISDEVSKKAKCSEGSTLSPEKELPKAKLRDKITTLQQIVSPFGKTDTASVLQEAITYINFYQEQVKLLSTPYMKNSSMKDPWGGWDREDHNKRGPKHLDLR…
AT1G32640	MTDYRLQPTMNLWTTDDNASMMEAFMSSSDISTLWPPASTTTTTATTETTPTPAMEIPAQAGFNQETLQQRLQALIEGTHEGWTYAIFWQPSYDFSGASVLGWGDGYYKGEEDKANPRRRSSSPPFSTPADQEYRKKVLRELNSLISGGVAPSDDAVDEEVTDTEWFFLVSMTQSFACGAGLAGKAFATGNAVWVSGSDQLSGSGCERAKQGGVFGMHTIACIPSANGVVEVGSTEPIRQSSDLINKVRILFNFDGGAGDLSGLNWNLDPDQGENDPSMWINDPIGTPGSNEPGNGAPSSSSQLFSKSIQFENGSSSTITENPNLDPTPSPVHSQTQNPKFNNTFSRELNFSTSSSTLVKPRSGEILNFGDEGKRSSGNPDPSSYSGQTQFENKRKRSM…
AT1G35460	MQSTHISGGSSGGGGGGGGEVSRSGLSRIRSAPATWIETLLEEDEEEGLKPNLCLTELLTGNNNSGGVITSRDDSFEFLSSVEQGLYNHHQGGGFHRQNSSPADFLSGSGSGTDGYFSNFGIPANYDYLSTNVDISPTKRSRDMETQFSSQLKEEQMSGGISGMMDMNMDKIFEDSVPCRVRAKRGCATHPRSIAERVRRTRISDRIRRLQELVPNMDKQTNTADMLEEAVEYVKALQSQIQELTEQQKRCKCKPKEEQ
AT1G49770	MTNAQELGQEGFMWGISNSDDSGGGCKRIEKEPLPSHPSHPSPEIQTTTVKKGKKRTKRNDKNHEEESPDHEIHIWTERERRKKMRDMFSKLHALLPQLPPKADKSTIVDEAVSSIKSLEQTLQKLEMQKLEKLQYSSASTNTTPTTTFAYAPSSSSSPTALLTPISNHPIDATATDSYPRAAFLADQVSSSSAAAANLPYPCNDPIVNFDTWSSRNVVLTICGNEAFFNLCVPKHKPGVFTSVCYLFEKYNMEVLFANVSSNVFWSTYVIQAQVNPSCENQLLGNGLGVVDVFKQVSQELVLYFSSL
AT1G51070	MVSPENTNWLSDYPLIEGAFSDQNPTFPWQIDGSATVRIGSYIWRSCYGCVITQLVFRCSCCDRDIGLLHKSILCFFFCLRFAYVPLFPKEVDESRSLPIAKGSVEVDGFLCDADVIKEPSSRKRIKTESCTGSNSKACREKQRRDRLNDKFTELSSVLEPGRTPKTDKVAIINDAIRMVNQARDEAQKLKDLNSSLQEKIKELKDEKNELRDEKQKLKVEKERIDQQLKAIKTQPQPQPCFLPNPQTLSQAQAPGSKLVPFTTYPGFAMWQFMPPAAVDTSQDHVLRPPVA
AT1G51140	MESEFQQHHFLLHDHQHQRPRNSGLIRYQSAPSSYFSSFGESIEEFLDRPTSPETERILSGFLQTTDTSDNVDSFLHHTFNSDGTEKKPPEVKTEDEDAEIPVTATATAMEVVVSGDGEISVNPEVSIGYVASVSRNKRPREKDDRTPVNNLARHNSSPAGLFSSIDVETAYAAVMKSMGGFGGSNVMSTSNTEASSLTPRSKLLPPTSRAMSPISEVDVKPGFSSRLPPRTLSGGFNRSFGNEGSASSKLTALARTQSGGLDQYKTKDEDSASRRPPLAHHMSLPKSLSDIEQLLSDSIPCKIRAKRGCATHPRSIAERVRRTKISERMRKLQDLVPNMDTQTNTADMLDLAVQYIKDLQEQVKALEESRARCRCSSA
AT1G59640	MDPSGMMNEGGPFNLAEIWQFPLNGVSTAGDSSRRSFVGPNQFGDADLTTAANGDPARMSHALSQAVIEGISGAWKRREDESKSAKIVSTIGASEGENKRQKIDEVCDGKAEAESLGTETEQKKQQMEPTKDYIHVRARRGQATDSHSLAERARREKISERMKILQDLVPGCNKVIGKALVLDEIINYIQSLQRQVEFLSMKLEAVNSRMNPGIEVFPPKEVMILMIINSIFSIFFTKQYMFLSRYSRGRSLDVYAVRSFKHCNKRSDLCFCSCSPKTELKTTIFSQNMTCFCRYSRVGVAISSSKHCNEPVTLCFYSYCLRKIYHFLLWNLKYKIQKSVLFS
AT1G61660	MAEEFKATASICGGGGGAWWNSPRSVMSPSDHFLSPCFGAAITSNDFSSQENHLKSRMTCTDNNNIVFGQREADSDSGGSTVTMDSTLQMMGLGFSSNCSSDWNQTILQEDLNSSFIRSSQDQDHGQGFLSTTTSPYILNPACSSSPSTSSSSSLIRTFYDPEPSPYNFVSTTSGSINDPQLSWANKTNPHHQVAYGLINSFSNNANSRPFWNSSSTTNLNNTTPSNFVTTPQIISTRLEDKTKNLKTRAQSESLKRAKDNESAAKKPRVTTPSPLPTFKVRKENLRDQITSLQQLVSPFGKTDTASVLQEAIEYIKFLHDQVTVLSTPYMKQGASNQQQQQISGKSKSQDENENHELRGHGLCLVPISSTFPVANETTADFWTPTFGGNNFR
AT1G62975	MDCVPSLFMPDSTYEDGLLFSDSFLLSPFISYQNNDVFHSITNKIGGSNKKRSLCDITYGANEANKNDDDRESKKMKHRDIERQRRQEVSSLFKRLRTLLPFQYIQGKRSTSDHIVQAVNYIKDLQIKIKELNEKRNRVKKVISATTTTHSAIEECTSSLSSSAASTLSSSCSCVGDKHITVVVTPCLVGVEIIISCCLGRNKSCLSSVLQMLAQEQRFSVVSCLSARRQQRFMHTIVSQVEDGKQINILELKDKIMTM
AT1G63650	MATGENRTVPDNLKKQLAVSVRNIQWSYGIFWSVSASQPGVLEWGDGYYNGDIKTRKTIQAAEVKIDQLGLERSEQLRELYESLSLAESSASGSSQVTRRASAAALSPEDLTDTEWYYLVCMSFVFNIGEGIPGGALSNGEPIWLCNAETADSKVFTRSLLAKSASLQTVVCFPFLGGVLEIGTTEHIKEDMNVIQSVKTLFLEAPPYTTISTRSDYQEIFDPLSDDKYTPVFITEAFPTTSTSGFEQEPEDHDSFINDGGASQVQSWQFVGEEISNCIHQSLNSSDCVSQTFVGTTGRLACDPRKSRIQRLGQIQEQSNHVNMDDDVHYQGVISTIFKTTHQLILGPQFQNFDKRSSFTRWKRSSSVKTLGEKSQKMIKKILFEVPLMNKKEELLPDT…
AT1G64625	MGSEYKHILKSLCLSHGWSYAVFWRYDPINSMILRFEEAYNDEQSVALVDDMVLQAPILGQGIVGEVASSGNHQWLFSDTLFQWEHEFQNQFLCGFKILIRQFTYTQTIAIIPLGSSGVVQLGSTQKILESTEILEQTTRALQETCLKPHDSGDLDTLFESLGDCEIFPAESFQGFSFDDIFAEDNPPSLLSPEMISSEAASSNQDLTNGDDYGFDILQSYSLDDLYQLLADPPEQNCSSMVIQGVDKDLFDILGMNSQTPTMALPPKGLFSELISSSLSNNTCSSSLTNVQEYSGVNQSKRRKLDTSSAHSSSLFPQEETVTSRSLWIDDDERSSIGGNWKKPHEEGVKKKRAKAGESRRPRPKDRQMIQDRIKELRGMIPNGAKCSIDTLLDLTIKH…
AT1G66470	MALVNDHPNETNYLSKQNSSSSEDLSSPGLDQPDAAYAGGGGGGGSASSSSTMNSDHQQHQGFVFYPSGEDHHNSLMDFNGSSFLNFDHHESFPPPAISCGGSSGGGGFSFLEGNNMSYGFTNWNHQHHMDIISPRSTETPQGQKDWLYSDSTVVTTGSRNESLSPKSAGNKRSHTGESTQPSKKLSSGVTGKTKPKPTTSPKDPQSLAAKNRRERISERLKILQELVPNGTKVDLVTMLEKAISYVKFLQVQVKVLATDEFWPAQGGKAPDISQVKDAIDAILSSSQRDRNSNLITN
AT1G68240	MERNNRNEGTHEEEQCSLSDIIYSFCSENHSELNPLQEIFGVTKNNDHEKHDEEPDEESYRMAKRQRSMEYRMMMEKKRRKEIKDKVDILQGLMPNHCTKPDLASKLENIIEYIKSLKYQVDVMSMAYTTTPVYTPPFYAAAQAPCMSPWGYYTPGVPMMPQQNMTYIPQYPQVYGTVPPNQTQP
AT1G68810	MCAKKEEEEEEEEDSSEAMNNIQNYQNDLFFHQLISHHHHHHHDPSQSETLGASGNVGSGFTIFSQDSVSPIWSLPPPTSIQPPFDQFPPPSSSPASFYGSFFNRSRAHHQGLQFGYEGFGGATSAAHHHHEQLRILSEALGPVVQAGSGPFGLQAELGKMTAQEIMDAKALAASKSHSEAERRRRERINNHLAKLRSILPNTTKTDKASLLAEVIQHVKELKRETSVISETNLVPTESDELTVAFTEEEETGDGRFVIKASLCCEDRSDLLPDMIKTLKAMRLKTLKAEITTVGGRVKNVLFVTGEESSGEEVEEEYCIGTIEEALKAVMEKSNVEESSSSGNAKRQRMSSHNTITIVEQQQQYNQR
AT1G68920	MDLSAKDEFSAEKRNPDNYDSVNNPSGDWRVDSYPSENLISAGPASCSPSQMMDSFGQTLWYDPTSVQAVGYAGFNGGNASSSSFRGSIDRSLEMGWNLPNLLPPKGNGLFLPNASSFLPPSMAQFPADSGFIERAARFSLFSGGNFSDMVNQPLGNSEAIGLFLQGGGTMQGQCQSNELNVGEPHNDVSVAVKESTVRSSEQAKPNVPGSGNVSEDTQSSGGNGQKGRETSSNTKKRKRNGQKNSEAAQSHRSQQSEEEPDNNGDEKRNDEQSPNSPGKKSNSGKQQGKQSSDPPKDGYIHVRARRGQATNSHSLAERVRREKISERMKFLQDLVPGCNKVTGKAVMLDEIINYVQSLQRQVEFLSMKLATVNPQMDFNLEGLLAKDALQLRAGSSST…
AT1G69010	MRTGKGNQEEEDYGEEDFNSKREGPSSNTTVHSNRDSKENDKASAIRSKHSVTEQRRRSKINERFQILRELIPNSEQKRDTASFLLEVIDYVQYLQEKVQKYEGSYPGWSQEPTKLTPWRNNHWRVQSLGNHPVAINNGSGPGIPFPGKFEDNTVTSTPAIIAEPQIPIESDKARAITGISIESQPELDDKGLPPLQPILPMVQGEQANECPATSDGLGQSNDLVIEGGTISISSAYSHELLSSLTQALQNAGIDLSQAKLSVQIDLGKRANQGLTHEEPSSKNPLSYDTQGRDSSVEEESEHSHKRMKTL
AT1G71200	MSSQPNHQTSISSLLHDRLHIPPAETIVEKESAEKDTCQSQRKRKEPVLHEVDGSSSGAAKKQDHNAKERLRRMRLHASYLTLGTLLPDHSSSSSKKKWSAPSIIDNVITYIPKLQNEVGELTLRKQKLVELERRGPSIRAISVLELGESGYEAVVQICLKKENEDEFSNLLHVMEVQGLSVLSASTSQVCREQRVVCYNFHVKMDEKPCEGDDYITVLKNNIISSLRDNTKCK
AT1G72210	MALEAVVYPQDPFSYISCKDFPFYDLYFQEEEDQDPQDTKNNIKLGQGQGHGFASNNYNGRTGDYSDDYNYNEEDLQWPRDLPYGSAVDTESQPPPSDVAAGGGRRKRRRTRSSKNKEEIENQRMTHIAVERNRRKQMNEYLAVLRSLMPPYYAQRGDQASIVGGAINYLKELEHHLQSMEPPVKTATEDTGAGHDQTKTTSASSSGPFSDFFAFPQYSNRPTSAAAAEGMAEIEVTMVESHASLKILAKKRPRQLLKLVSSIQSLRLTLLHLNVTTRDDSVLYSISVKVEEGSQLNTVEDIAAAVNQILRRIEEESSFS
AT1G73830	MANLSSDFQTFTMDDPIRQLAELSNTLHHFQTFPPPFSSSLDSLFFHNQFPDHFPGKSLENNFHQGIFFPSNIQNNEESSSQFDTKKRKSLMEAVSTSENSVSDQTLSTSSAQVSINGNISTKNNSSRRGKRSKNREEEKEREVVHVRARRGQATDSHSIAERVRRGKINERLKCLQDIVPGCYKTMGMATMLDEIINYVQSLQNQVEFLSMKLTAASSYYDFNSETDAVESMQKAKAREAVEMGQGRDGSSVFHSSSWTL
AT1G74500	MSGRRSRSRQSSGTSRISEDQINDLIIKLQQLLPELRDSRRSDKVSAARVLQDTCNYIRNLHREVDDLSERLSELLANSDTAQAALIRSLLTQ
AT2G14760	MEAMGEWSTGLGGIYTEEADFMNQLLASYEQPCGGSSSETTATLTAYHHQGSQWNGGFCFSQESSSYSGYCAAMPRQEEDNNGMEDATINTNLYLVGEETSECDATEYSGKSLLPLETVAENHDHSMLQPENSLTTTTDEKMFNQCESSKKRTRATTTDKNKRANKARRSQKCVEMSGENENSGEEEYTEKAAGKRKTKPLKPQKTCCSDDESNGGDTFLSKEDGEDSKALNLNGKTRASRGAATDPQSLYARLKQLNKVHCMMVQKRRERINERLRILQHLVPNGTKVDISTMLEEAVQYVKFLQLQIKLLSSDDLWMYAPIAYNGMDIGLDLKLNALTR
AT2G16910	MESNMQNLLEKLRPLVGARAWDYCVLWRLNEDQRFVKWMGCCCGGTELIAENGTEEFSYGGCRDVMFHHPRTKSCEFLSHLPASIPLDSGIYAETLLTNQTGWLSESSEPSFMQETICTRVLIPIPGGLVELFATRHVAEDQNVVDFVMGHCNMLMDDSVTINMMVADEVESKPYGMLSGDIQQKGSKEEDMMNLPSSYDISADQIRLNFLPQMSDYETQHLKMKSDYHHQALGYLPENGNKEMMGMNPFNTVEEDGIPVIGEPSLLVNEQQVVNDKDMNENGRVDSGSDCSDQIDDEDDPKYKKKSGKGSQAKNLMAERRRRKKLNDRLYALRSLVPRITKLDRASILGDAINYVKELQNEAKELQDELEENSETEDGSNRPQGGMSLNGTVVTGFHP…
AT2G18300	MLEGLVSQESLSLNSMDMSVLERLKWVQQQQQQLQQVVSHSSNNSPELLQILQFHGSNNDELLESSFSQFQMLGSGFGPNYNMGFGPPHESISRTSSCHMEPVDTMEVLLKTGEETRAVALKNKRKPEVKTREEQKTEKKIKVEAETESSMKGKSNMGNTEASSDTSKETSKGASENQKLDYIHVRARRGQATDRHSLAERARREKISKKMKYLQDIVPGCNKVTGKAGMLDEIINYVQCLQRQVEFLSMKLAVLNPELELAVEDVSVKQFQAYFTNVVASKQSIMVDVPLFPLDQQGSLDLSAINPNQTTSIEAPSGSWETQSQSLYNTSSLENSCGNYNKISKILLSTKCTHQYVPIRRVWV
AT2G20180	MHHFVPDFDTDDDYVNNHNSSLNHLPRKSITTMGEDDDLMELLWQNGQVVVQNQRLHTKKPSSSPPKLLPSMDPQQQPSSDQNLFIQEDEMTSWLHYPLRDDDFCSDLLFSAAPTATATATVSQVTAARPPVSSTNESRPPVRNFMNFSRLRGDFNNGRGGESGPLLSKAVVRESTQVSPSATPSAAASESGLTRRTDGTDSSAVAGGGAYNRKGKAVAMTAPAIEITGTSSSVVSKSEIEPEKTNVDDRKRKEREATTTDETESRSEETKQARVSTTSTKRSRAAEVHNLSERKRRDRINERMKALQELIPRCNKSDKASMLDEAIEYMKSLQLQIQMMSMGCGMMPMMYPGMQQYMPHMAMGMGMNQPIPPPSFMPFPNMLAAQRPLPTQTHMAGSG…
AT2G22750	MNSLVGDVPQSLSSLDDTTTCYNLDASCNKSLVEERPSKILKTTHISPNLHPFSSSNPPPPKHQPSSRILSFEKTGLHVMNHNSPNLIFSPKDEEIGLPEHKKAELIIRGTKRAQSLTRSQSNAQDHILAERKRREKLTQRFVALSALIPGLKKMDKASVLGDAIKHIKYLQESVKEYEEQKKEKTMESVVLVKKSSLVLDENHQPSSSSSSDGNRNSSSSNLPEIEVRVSGKDVLIKILCEKQKGNVIKIMGEIEKLGLSITNSNVLPFGPTFDISIIAQKNNNFDMKIEDVVKNLSFGLSKLT
AT2G22760	MDEDFFLPDFSLVDIDFDFNIYEENNLSPDESLSNSRRADQSSKFDHQMHFECLREKPKAAVKPMMKINNKQQLISFDFSSNVISSPAAEEIIMDKLVGRGTKRKTCSHGTRSPVLAKEHVLAERKRREKLSEKFIALSALLPGLKKADKVTILDDAISRMKQLQEQLRTLKEEKEATRQMESMILVKKSKVFFDEEPNLSCSPSVHIEFDQALPEIEAKISQNDILIRILCEKSKGCMINILNTIENFQLRIENSIVLPFGDSTLDITVLAQMDKDFSMSILKDLVRNLRLAMV
AT2G22770	MDDSSFMDLMIDTDEYLIDDWESDFPICGETNTNPGSESGSGTGFELLAERPTKQMKTNNNMNSTSSSPSSSSSSGSRTSQVISFGSPDTKTNPVETSLNFSNQVSMDQKVGSKRKDCVNNGGRREPHLLKEHVLAERKRRQKLNERLIALSALLPGLKKTDKATVLEDAIKHLKQLQERVKKLEEERVVTKKMDQSIILVKRSQVYLDDDSSSYSSTCSAASPLSSSSDEVSIFKQTMPMIEARVSDRDLLIRVHCEKNKGCMIKILSSLEKFRLEVVNSFTLPFGNSTLVITILTKMDNKFSRPVEEVVKNIRVALAE
AT2G24260	MMNSSLLTPSSSSSSHIQTPSTTFDHEDFLDQIFSSAPWPSVVDDAHPLPSDGFHGHDVDSRNQPIMMMPLNDGSSVHALYNGFSVAGSLPNFQIPQGSGGGLMNQQGQTQTQTQPQASASTATGGTVAAPPQSRTKIRARRGQATDPHSIAERLRRERIAERMKALQELVPNGNKTDKASMLDEIIDYVKFLQLQVKVLSMSRLGGAASVSSQISEAGGSHGNASSAMVGGSQTAGNSNDSVTMTEHQVAKLMEEDMGSAMQYLQGKGLCLMPISLATAISTATCHSRNPLIPGAVADVGGPSPPNLSGMTIQSTSTKMGSGNGKLNGNGVTERSSSIAVKEAVSVSKA
AT2G27230	MGVLLREALRSMCVNNQWSYAVFWKIGCQNSSLLIWEECYNETESSSNPRRLCGLGVDTQGNEKVQLLTNRMMLNNRIILVGEGLVGRAAFTGHHQWILANSFNRDVHPPEVINEMLLQFSAGIQTVAVFPVVPHGVVQLGSSLPIMENLGFVNDVKGLILQLGCVPGALLSENYRTYEPAADFIGVPVSRIIPSQGHKILQSSAFVAETSKQHFNSTGSSDHQMVEESPCNLVDEHEGGWQSTTGFLTAGEVAVPSNPDAWLNQNFSCMSNVDAAEQQQIPCEDISSKRSLGSDDLFDMLGLDDKNKGCDNSWGVSQMRTEVLTRELSDFRIIQEMDPEFGSSGYELSGTDHLLDAVVSGACSSTKQISDETSESCKTTLTKVSNSSVTTPSHSSPQG…
AT2G28160	MEGRVNALSNINDLELHNFLVDPNFDQFINLIRGDHQTIDENPVLDFDLGPLQNSPCFIDENQFIPTPVDDLFDELPDLDSNVAESFRSFDGDSVRAGGEEDEEDYNDGDDSSATTTNNDGTRKTKTDRSRTLISERRRRGRMKDKLYALRSLVPNITKMDKASIVGDAVLYVQELQSQAKKLKSDIAGLEASLNSTGGYQEHAPDAQKTQPFRGINPPASKKIIQMDVIQVEEKGFYVRLVCNKGEGVAPSLYKSLESLTSFQVQNSNLSSPSPDTYLLTYTLDGTCFEQSLNLPNLKLWITGSLLNQGFEFIKSFT
AT2G31210	MYEESSCFDPNSMVDNNGGFCAAETTFTVSHQFQPPLGSTTNSFDDDLKLPTMDEFSVFPSVISLPNSETQNQNISNNNHLINQMIQESNWGVSEDNSNFFMNTSHPNTTTTPIPDLLSLLHLPRCSMSLPSSDIMAGSCFTYDPLFHLNLPPQPPLIPSNDYSGYLLGIDTNTTTQRDESNVGDENNNAQFDSGIIEFSKEIRRKGRGKRKNKPFTTERERRCHLNERYEALKLLIPSPSKGDRASILQDGIDYINELRRRVSELKYLVERKRCGGRHKNNEVDDNNNNKNLDDHGNEDDDDDDENMEKKPESDVIDQCSSNNSLRCSWLQRKSKVTEVDVRIVDDEVTIKVVQKKKINCLLLVSKVLDQLQLDLHHVAGGQIGEHYSFLFNTKIYEG…
AT2G31215	MERYTKKNERFKAEEGKGSKKSRTFLTERERRALFNDRFFDLKNLIPNPTKGGEASIVQDGIVYINELQRLVSELKYLVEKKKCGARHNNIEVDNKNTIYGTSKIEHPFSKNKNTFNCLIRTLRFVHHF
AT2G31220	MGCFDPNTPAEVTVESSFSQAEPPPPPPQVLVAGSTSNSNCSVEVEELSEFHLSPQDCPQASSTPLQFHINPPPPPPPPCDQLHNNLIHQMASHQQQHSNWDNGYQDFVNLGPNSATTPDLLSLLHLPRCSLPPNHHPSSMLPTSFSDIMSSSSAAAVMYDPLFHLNFPMQPRDQNQLRNGSCLLGVEDQIQMDANGGMNVLYFEGANNNNGGFENEILEFNNGVTRKGRGSRKSRTSPTERERRVHFNDRFFDLKNLIPNPTKIDRASIVGEAIDYIKELLRTIEEFKMLVEKKRCGRFRSKKRARVGEGGGGEDQEEEEDTVNYKPQSEVDQSCFNKNNNNSLRCSWLKRKSKVTEVDVRIIDDEVTIKLVQKKKINCLLFTTKVLDQLQLDLHHVA…
AT2G31280	MGSTSQEILKSFCFNTDWDYAVFWQLNHRGSRMVLTLEDAYYDHHGTNMHGAHDPLGLAVAKMSYHVYSLGEGIVGQVAVSGEHQWVFPENYNNCNSAFEFHNVWESQISAGIKTILVVAVGPCGVVQLGSLCKVNEDVNFVNHIRHLFLALRDPLADHAANLRQCNMNNSLCLPKMPSEGLHAEAFPDCSGEVDKAMDVEESNILTQYKTRRSDSMPYNTPSSCLVMEKAAQVVGGREVVQGSTCGSYSGVTFGFPVDLVGAKHENQVGTNIIRDAPHVGMTSGCKDSRDLDPNLHLYMKNHVLNDTSTSALAIEAERLITSQSYPRLDSTFQATSRTDKESSYHNEVFQLSENQGNKYIKETERMLGRNCESSQFDALISSGYTFAGSELLEALGSA…
AT2G31730	MEYSRDSAEMMMETKRNVYSLEDNKIKRHKSSDLSFSSKERKDKLAERISALQQLVSPYGKTDTASVLLEGMQYIQFLQEQVKVLSAPYLQATPSTTEEEVEEYSLRSKGLCLVPLEYTSEVAQTNGADIWAPVKTPTSSHAFNLSSSNSPFQ
AT2G41130	MQPETSDQMLYSFLAGNEVGGGGYCVSGDYMTTMQSLCGSSSSTSSYYPLAISGIGETMAQDRALAALRNHKEAERRRRERINSHLNKLRNVLSCNSKTDKATLLAKVVQRVRELKQQTLETSDSDQTLLPSETDEISVLHFGDYSNDGHIIFKASLCCEDRSDLLPDLMEILKSLNMKTLRAEMVTIGGRTRSVLVVAADKEMHGVESVHFLQNALKSLLERSSKSLMERSSGGGGGERSKRRRALDHIIMV
AT2G41240	MCALVPPLYPNFGWPCGDHSFYETDDVSNTFLDFPLPDLTVTHENVSSENNRTLLDNPVVMKKLNHNASERERRKKINTMFSSLRSCLPPTNQTKKLSVSATVSQALKYIPELQEQVKKLMKKKEELSFQISGQRDLVYTDQNSKSEEGVTSYASTVSSTRLSETEVMVQISSLQTEKCSFGNVLSGVEEDGLVLVGASSSRSHGERLFYSMHLQIKNGQVNSEELGDRLLYLYEKCGHSFT
AT2G42280	MDSNNHLYDPNPTGSGLLRFRSAPSSVLAAFVDDDKIGFDSDRLLSRFVTSNGVNGDLGSPKFEDKSPVSLTNTSVSYAATLPPPPQLEPSSFLGLPPHYPRQSKGIMNSVGLDQFLGINNHHTKPVESNLLRQSSSPAGMFTNLSDQNGYGSMRNLMNYEEDEESPSNSNGLRRHCSLSSRPPSSLGMLSQIPEIAPETNFPYSHWNDPSSFIDNLSSLKREAEDDGKLFLGAQNGESGNRMQLLSHHLSLPKSSSTASDMVSVDKYLQLQDSVPCKIRAKRGCATHPRSIAERVRRTRISERMRKLQELVPNMDKQTNTSDMLDLAVDYIKDLQRQYKILNDNRANCKCMNKEKKSI
AT2G42300	MDLTQGFRARSGVVGPVAGLESLNFSDEFRHLVTTMPPETTGGSFTALLEMPVTQAMELLHFPDSSSSQARTVTSGDISPTTLHPFGALTFPSNSLLLDRAARFSVIATEQNGNFSGETANSLPSNPGANLDRVKAEPAETDSMVENQNQSYSSGKRKEREKKVKSSTKKNKSSVESDKLPYVHVRARRGQATDNHSLAERARREKINARMKLLQELVPGCDKIQGTALVLDEIINHVQTLQRQVEMLSMRLAAVNPRIDFNLDSILASENGSLMDGSFNAESYHQLQQWPFDGYHQPEWGREEDHHQANFSMGSATLHPNQVKMEL
AT2G43010	MEHQGWSFEENYSLSTNRRSIRPQDELVELLWRDGQVVLQSQTHREQTQTQKQDHHEEALRSSTFLEDQETVSWIQYPPDEDPFEPDDFSSHFFSTMDPLQRPTSETVKPKSSPEPPQVMVKPKACPDPPPQVMPPPKFRLTNSSSGIRETEMEQYSVTTVGPSHCGSNPSQNDLDVSMSHDRSKNIEEKLNPNASSSSGGSSGCSFGKDIKEMASGRCITTDRKRKRINHTDESVSLSDAIGNKSNQRSGSNRRSRAAEVHNLSERRRRDRINERMKALQELIPHCSKTDKASILDEAIDYLKSLQLQLQVMWMGSGMAAAAASAPMMFPGVQPQQFIRQIQSPVQLPRFPVMDQSAIQNNPGLVCQNPVQNQIISDRFARYIGGFPHMQAATQMQPM…
AT2G43060	MASADKLINTDVPEKDVFAFHFLQSLSNLRKQNPFDTPDQKNYRVRKIKKAAYVSMARAAGGSSRLWSRALLRRADKDDNKIVRFSRRKWKISSKRRRSNQRAPVVEEAAERLRNLVPGGGGMETSKLMEETAHYIKCLSMQVKVMQCLVDGLSPK
AT2G43140	MYPPNSSKSTAHDGGGDADTNQYDSAAGATRDFSSLGPQTHHHPPPQRQQQHQQNPNLVGHYLPGEPSSIGFDSNASSSSSLFRHRSSPAGFYDQHLPTDPNGFSLGRPNGGYGGGGEQGPSRLKSELRFSSGSSSHQEHNSLPRISEVEAAAAARNGVASSSMSFGNNRTNNWDNSSSHISFTIDQPGKRSKNSDFFTLETQYSMPQTTLEMATMENLMNIPEDSVPCRARAKRGFATHPRSIAERERRTRISGKLKKLQELVPNMDKQTSYADMLDLAVEHIKGLQHQVESLEKGMERCTCGACKKR
AT2G46510	MNMSDLGWDDEDKSVVSAVLGHLASDFLRANSNSNQNLFLVMGTDDTLNKKLSSLVDWPNSENFSWNYAIFWQQTMSRSGQQVLGWGDGCCREPNEEEESKVVRSYNFNNMGAEEETWQDMRKRVLQKLHRLFGGSDEDNYALSLEKVTATEIFFLASMYFFFNHGEGGPGRCYSSGKHVWLSDAVNSESDYCFRSFMAKSAGIRTIVMVPTDAGVLELGSVWSLPENIGLVKSVQALFMRRVTQPVMVTSNTNMTGGIHKLFGQDLSGAHAYPKKLEVRRNLDERFTPQSWEGYNNNKGPTFGYTPQRDDVKVLENVNMVVDNNNYKTQIEFAGSSVAASSNPSTNTQQEKSESCTEKRPVSLLAGAGIVSVVDEKRPRKRGRKPANGREEPLNHVEA…
AT2G46810	MFVLRVSNQSFKLHQQVQCKDEIFCLDQKVNVRRSLQVQETVEDHQSFALEEEEQQLSTPSLLQDTTIPFLQMLQQSEDPSPFLSFKDPSFLALLSLQTLEKPWELENYLPHEVPEFHSPIHSETNHYYHNPSLEGVNEAISNQELPFNPLENARSRRKRKNNNLASLMTREKRKRRRTKPTKNIEEIESQRMTHIAVERNRRRQMNVHLNSLRSIIPSSYIQRGDQASIVGGAIDFVKILEQQLQSLEAQKRSQQSDDNKEQIPEDNSLRNISSNKLRASNKEEQSSKLKIEATVIESHVNLKIQCTRKQGQLLRSIILLEKLRFTVLHLNITSPTNTSVSYSFNLKMEDECNLGSADEITAAIRQIFDS
AT2G46970	MEAKPLASSSSEPNMISPSSNIKPKLKDEDYMELVCENGQILAKIRRPKNNGSFQKQRRQSLLDLYETEYSEGFKKNIKILGDTQVVPVSQSKPQQDKETNEQMNNNKKKLKSSKIEFERNVSKSNKCVESSTLIDVSAKGPKNVEVTTAPPDEQSAAVGRSTELYFASSSKFSRGTSRDLSCCSLKRKYGDIEEEESTYLSNNSDDESDDAKTQVHARTRKPVTKRKRSTEVHKLYERKRRDEFNKKMRALQDLLPNCYKDDKASLLDEAIKYMRTLQLQVQMMSMGNGLIRPPTMLPMGHYSPMGLGMHMGAAATPTSIPQFLPMNVQATGFPGMNNAPPQMLSFLNHPSGLIPNTPIFSPLENCSQPFVVPSCVSQTQATSFTQFPKSASASNLED…
AT2G47270	MGVTLEGQRKESIWVLMRRQRARRALVKKIMIRPRKSVEASRRPCRAIHRRVKTLKELVPNTKTSEGLDGLFRQTADYILALEMKVKVMQTMVQVLTETNCV
AT3G05800	MSSEQGNGSNPSTSPEVEGTKTIPFRRRLQRGQRVFAPKLMEALRRSRVSSEEAPVRHLSRRWRATTAQKVYSLKLYDALQRSRRSATVRDTADKVLATTARGATRWSRAILVSRFGTSLRRRRNTKPASALAAAIRGSGGSGRRRKLSAVGNRVRVLGGLVPGCRRTALPELLDETADYIAALEMQVRAMTALSKILSELQPSTNLGSAL
AT3G06120	MSHIAVERNRRRQMNEHLKSLRSLTPCFYIKRGDQASIIGGVIEFIKELQQLVQVLESKKRRKTLNRPSFPYDHQTIEPSSLGAATTRVPFSRIENVMTTSTFKEVGACCNSPHANVEAKISGSNVVLRVVSRRIVGQLVKIISVLEKLSFQVLHLNISSMEETVLYFFVVKIGLECHLSLEELTLEVQKSFVSDEVIVSTN
AT3G06590	MASLISDIEPPTSTTSDLVRRKKRSSASSAASSRSSASSVSGEIHARWRSEKQQRIYSAKLFQALQQVRLNSSASTSSSPTAQKRGKAVREAADRALAVSARGRTLWSRAILANRIKLKFRKQRRPRATMAIPAMTTVVSSSSNRSRKRRVSVLRLNKKSIPDVNRKVRVLGRLVPGCGKQSVPVILEEATDYIQALEMQVRAMNSLVQLLSSYGSAPPPI
AT3G07340	MENELFMNAGVSHPPVMTSPSSSSAMLKWVSMETQPVDPSLSRNLFWEKSTEQSIFDSALSSLVSSPTPSNSNFSVGGVGGENVIMRELIGKLGNIGDIYGITASNGNSCYATPMSSPPPGSMMETKTTTPMAELSGDPGFAERAARFSCFGSRSFNSRTNSPFPINNEPPITTNEKMPRVSSSPVFKPLASHVPAGESSGELSRKRKTKSKQNSPSAVSSSKEIEEKEDSDPKRCKKSEENGDKTKSIDPYKDYIHVRARRGQATDSHSLAERVRREKISERMKLLQDLVPGCNKVTGKALMLDEIINYVQSLQRQVEFLSMKLSSVNTRLDFNMDALLSKDIFPSSNNLMHHQQVLQLDSSAETLLGDHHNKNLQLNPDISSNNVINPLETSETRSF…
AT3G17100	MESISPVSNQLLQPTTTSSNSDRSRRKRKKKSSPSSVEKSPSPSISLEKWRSEKQQQIYSTKLVHALRELRISQQPSSSSSSSIPRGGRAVREVADRALAVAARGKTLWSRAILSKAVKLKFRKHKRQRISNPTTTTLTTGSIRSKKQRATVLRLKAKGLPAVQRKVKVLSRLVPGCRKQSLPVVLEETTDYIAAMEMQIRTMTAILSAVSSSPPPPTPGHEGGQTHMLG
AT3G19500	MGDTAEDQDDRAMMEAEGVTSFSELLMFSDGVLSSSSDHQPEGNVGDGGEDSLGFVFSGKTGSRMLCFSGGYQNDDESLFLEPSVPTSGVSDLDPSCIKIDCRNSNDACTVDKSTKSSTKKRTGTGNGQESDQNRKPGKKGKRNQEKSSVGIAKVRKERLGERIAALQQLVSPYGKTDAASVLHEAMGYIKFLQDQIQVLCSPYLINHSLDGGVVTGDVMAAMKAKDLRSRGLCLVPVSSTVHVENSNGADFWSPATMGHTTSPSLPQGF
AT3G19860	MGIRENGIMLVSRERERARRLENRESIFAEPPCLLLAHRISPSPSILPAEEEVMDVSARKSQKAGREKLRREKLNEHFVELGNVLDPERPKNDKATILTDTVQLLKELTSEVNKLKSEYTALTDESRELTQEKNDLREEKTSLKSDIENLNLQYQQRLRSMSPWGAAMDHTVMMAPPPSFPYPMPIAMPPGSIPMHPSMPSYTYFGNQNPSMIPAPCPTYMPYMPPNTVVEQQSVHIPQNPGNRSREPRAKVSRESRSEKAEDSNEVATQLELKTPGSTSDKDTLQRPEKTKRCKRNNNNNSIEESSHSSKCSSSPSVRDHSSSSSVAGGQKPDDAK
AT3G20640	MGDHHDFINSGSWWKVSSSSSPSSSSSMRASSIESGGSAVFHDKLHHHSLATDHHLQMIGLGLSSQSPVDQWNQSLLRGDSKAETSFGVMLQENLNLDATSNANANTTSSTSSYQLQESDSSHHHQALWRDPQSDFKPQILTSGGNRGFFLDHQFSPHGSSSTDSSTVTCQGFAVDNSSNAMYAATTTTPNSSSGMFHHQQAGGFGSSDQQPSRNHQQSSLGYSQFGSSTGNYDQMASALPSTWFLRSSPPPKPHSPLRFSNNATFWNPAAAGNAGAPPPHDASSNFFPALQPPQIHPQSFDEQPKNISEIRDSSSNEVKRGGNDHQPAAKRAKSEAASPSPAFKRKEKMGDRIAALQQLVSPFGKTDAASVLSEAIEYIKFLHQQVSALSNPYMKSGA…
AT3G21330	MEGLESVYAQAMYGMTRESKIMEHQGSDLIWGGNELMARELCSSSSYHHQLINPNLSSCFMSDLGVLGEIQQQQHVGNRASSIDPSSLDCLLSATSNSNNTSTEDDEGISVLFSDCQTLWSFGGVSSAESENREITTETTTTIKPKPLKRNRGGDGGTTETTTTTTKPKSLKRNRGDETGSHFSLVHPQDDSEKGGFKLIYDENQSKSKKPRTEKERGGSSNISFQHSTCLSDNVEPDAEAIAQMKEMIYRAAAFRPVNFGLEIVEKPKRKNVKISTDPQTVAARQRRERISEKIRVLQTLVPGGTKMDTASMLDEAANYLKFLRAQVKALENLRPKLDQTNLSFSSAPTSFPLFHPSFLPLQNPNQIHHPEC
AT3G22100	METPAYDFDSLTDLPPLPPSDFTPSNAFTFPDHNLDFSFLDSTLSLLNRHHLSESTRLEQIFYDSTHTQLFHNDDTTTTTTPFLHLPDLKSIDAVEEPTTMKLFPSLSPPLPAAKRQKLNSTSSSTTSGSPTASNDGGIITKRRKISDKIRSLEKLMPWERKMNLAMTLEESHKYIKFLQSQIASLRWMPLESVYNTAGEVGETDLLKSLTRQQILQVLANSPGSRNVLSSRGVCVFSYEQLLSLKTMSRNL
AT3G23210	MYPSIEDDDDLLAALCFDQSNGVEDPYGYMQTNEDNIFQDFGSCGVNLMQPQQEQFDSFNGNLEQVCSSFRGGNNGVVYSSSIGSAQLDLAASFSGVLQQETHQVCGFRGQNDDSAVPHLQQQQGQVFSGVVEINSSSSVGAVKEEFEEECSGKRRRTGSCSKPGTKACREKLRREKLNDKFMDLSSVLEPGRTPKTDKSAILDDAIRVVNQLRGEAHELQETNQKLLEEIKSLKADKNELREEKLVLKAEKEKMEQQLKSMVVPSPGFMPSQHPAAFHSHKMAVAYPYGYYPPNMPMWSPLPPADRDTSRDLKNLPPVA
AT3G23690	MNMDKETEQTLNYLPLGQSDPFGNGNEGTIGDFLGRYCNNPQEISPLTLQSFSLNSQISENFPISGGIRFPPYPGQFGSDREFGSQPTTQESNKSSLLDPDSVSDRVHTTKSNSRKRKSIPSGNGKESPASSSLTASNSKVSGENGGSKGGKRSKQDVAGSSKNGVEKCDSKGDNKDDAKPPEAPKDYIHVRARRGQATDSHSLAERARREKISERMTLLQDLVPGCNRITGKAVMLDEIINYVQSLQRQVEFLSMKLATVNPRMEFNANASLSTEMIQPGESLTQSLYAMACSEQRLPSAYYSLGKNMPRFSDTQFPSNDGFVHTETPGFWENNDLQSIVQMGFGDILQQQSNNNNNNCSEPTLQMKLEP
AT3G24140	MDKDYSAPNFLGESSGGNDDNSSGMIDYMFNRNLQQQQKQSMPQQQQHQLSPSGFGATPFDKMNFSDVMQFADFGSKLALNQTRNQDDQETGIDPVYFLKFPVLNDKIEDHNQTQHLMPSHQTSQEGGECGGNIGNVFLEEKEDQDDDNDNNSVQLRFIGGEEEDRENKNVTKKEVKSKRKRARTSKTSEEVESQRMTHIAVERNRRKQMNEHLRVLRSLMPGSYVQRGDQASIIGGAIEFVRELEQLLQCLESQKRRRILGETGRDMTTTTTSSSSPITTVANQAQPLIITGNVTELEGGGGLREETAENKSCLADVEVKLLGFDAMIKILSRRRPGQLIKTIAALEDLHLSILHTNITTMEQTVLYSFNVKITSETRFTAEDIASSIQQIFSFIHAN…
AT3G25710	MYAMKEEDCLQTFHNLQDYQDQFHLHHHPQILPWSSTSLPSFDPLHFPSNPTRYSDPVHYFNRRASSSSSSFDYNDGFVSPPPSMDHPQNHLRILSEALGPIMRRGSSFGFDGEIMGKLSAQEVMDAKALAASKSHSEAERRRRERINTHLAKLRSILPNTTKTDKASLLAEVIQHMKELKRQTSQITDTYQVPTECDDLTVDSSYNDEEGNLVIRASFCCQDRTDLMHDVINALKSLRLRTLKAEIATVGGRVKNILFLSREYDDEEDHDSYRRNFDGDDVEDYDEERMMNNRVSSIEEALKAVIEKCVHNNDESNDNNNLEKSSSGGIKRQRTSKMVNRCYN
AT3G26744	MGLDGNNGGGVWLNGGGGEREENEEGSWGRNQEDGSSQFKPMLEGDWFSSNQPHPQDLQMLQNQPDFRYFGGFPFNPNDNLLLQHSIDSSSSCSPSQAFSLDPSQQNQFLSTNNNKGCLLNVPSSANPFDNAFEFGSESGFLNQIHAPISMGFGSLTQLGNRDLSSVPDFLSARSLLAPESNNNNTMLCGGFTAPLELEGFGSPANGGFVGNRAKVLKPLEVLASSGAQPTLFQKRAAMRQSSGSKMGNSESSGMRRFSDDGDMDETGIEVSGLNYESDEINESGKAAESVQIGGGGKGKKKGMPAKNLMAERRRRKKLNDRLYMLRSVVPKISKMDRASILGDAIDYLKELLQRINDLHNELESTPPGSLPPTSSSFHPLTPTPQTLSCRVKEELCPS…
AT3G47640	MVSKTPSTSSDEANATADERCRKGKVPKRINKAVRERLKREHLNELFIELADTLELNQQNSGKASILCEATRFLKDVFGQIESLRKEHASLLSESSYVTTEKNELKEETSVLETEISKLQNEIEARANQSKPDLNTSPAPEYHHHHYQQQHPERVSQFPGLPIFQGPGFQQSATTLHPPATVLVLPIQPDPQTQDISEMTQAQQPLMFNSSNVSKPCPRYASAADSWSSRLLGERLKASE
AT3G47710	MSSRKSRSRQTGASMITDEQINDLVLQLHRLLPELANNRRSGKVSASRVLQETCSYIRNLSKEVDDLSERLSQLLESTDSAQAALIRSLLMQ
AT3G50330	MDNSDILMNMMMQQMEKLPEHFSNSNPNPNPHNIMMLSESNTHPFFFNPTHSHLPFDQTMPHHQPGLNFRYAPSPSSSLPEKRGGCSDNANMAAMREMIFRIAVMQPIHIDPESVKPPKRKNVRISKDPQSVAARHRRERISERIRILQRLVPGGTKMDTASMLDEAIHYVKFLKKQVQSLEEHAVVNGGGMTAVAGGALAGTVGGGYGGKGCGIMRSDHHQMLGNAQILR
AT3G56770	MQPEVSDQIFYAFLTGGLCASSTSTTVTSSSDPFATVYEDKALASLRNHKEAERKRRARINSHLNKLRKLLSCNSKTDKSTLLAKVVQRVKELKQQTLEITDETIPSETDEISVLNIEDCSRGDDRRIIFKVSFCCEDRPELLKDLMETLKSLQMETLFADMTTVGGRTRNVLVVAADKEHHGVQSVNFLQNALKSLLERSSKSVMVGHGGGGGEERLKRRRALDHIIMV
AT3G56970	MCALVPSFFTNFGWPSTNQYESYYGAGDNLNNGTFLELTVPQTYEVTHHQNSLGVSVSSEGNEIDNNPVVVKKLNHNASERDRRKKINTLFSSLRSCLPASDQSKKLSIPETVSKSLKYIPELQQQVKRLIQKKEEILVRVSGQRDFELYDKQQPKAVASYLSTVSATRLGDNEVMVQVSSSKIHNFSISNVLGGIEEDGFVLVDVSSSRSQGERLFYTLHLQVENMDDYKINCEELSERMLYLYEKCENSFN
AT3G56980	MCALVPPLFPNFGWPSTGEYDSYYLAGDILNNGGFLDFPVPEETYGAVTAVTQHQNSFGVSVSSEGNEIDNNPVVVKKLNHNASERDRRRKINSLFSSLRSCLPASGQSKKLSIPATVSRSLKYIPELQEQVKKLIKKKEELLVQISGQRNTECYVKQPPKAVANYISTVSATRLGDNEVMVQISSSKIHNFSISNVLSGLEEDRFVLVDMSSSRSQGERLFYTLHLQVEKIENYKLNCEELSQRMLYLYEECGNSYI
AT3G57800	MDLTGGFGARSGGVGPCREPIGLESLHLGDEFRQLVTTLPPENPGGSFTALLELPPTQAVELLHFTDSSSSQQAAVTGIGGEIPPPLHSFGGTLAFPSNSVLMERAARFSVIATEQQNGNISGETPTSSVPSNSSANLDRVKTEPAETDSSQRLISDSAIENQIPCPNQNNRNGKRKDFEKKGKSSTKKNKSSEENEKLPYVHVRARRGQATDSHSLAERARREKINARMKLLQELVPGCDKGTDFGGKIKIKVCFGVHLLMISGKKVAIFLWKVSCEDLIDCSFSPPRIQGTALVLDEIINHVQSLQRQVEMLSMRLAAVNPRIDFNLDTILASENGSLMDGSFNAAPMQLAWPQQAIETEQSFHHRQLQQPPTQQWPFDGLNQPVWGREEDQAHGND…
AT3G59060	MEQVFADWNFEDNFHMSTNKRSIRPEDELVELLWRDGQVVLQSQARREPSVQVQTHKQETLRKPNNIFLDNQETVQKPNYAALDDQETVSWIQYPPDDVIDPFESEFSSHFFSSIDHLGGPEKPRTIEETVKHEAQAMAPPKFRSSVITVGPSHCGSNQSTNIHQATTLPVSMSDRSKNVEERLDTSSGGSSGCSYGRNNKETVSGTSVTIDRKRKHVMDADQESVSQSDIGLTSTDDQTMGNKSSQRSGSTRRSRAAEVHNLSERRRRDRINERMKALQELIPHCSRTDKASILDEAIDYLKSLQMQLQVMWMGSGMAAAAAAAASPMMFPGVQSSPYINQMAMQSQMQLSQFPVMNRSAPQNHPGLVCQNPVQLQLQAQNQILSEQLARYMGGIPQM…
AT3G61950	MERFQGHINPCFFDRKPDVRSLEVQGFAEAQSFAFKEKEEESLQDTVPFLQMLQSEDPSSFFSIKEPNFLTLLSLQTLKEPWELERYLSLEDSQFHSPVQSETNRFMEGANQAVSSQEIPFSQANMTLPSSTSSPLSAHSRRKRKINHLLPQEMTREKRKRRKTKPSKNNEEIENQRINHIAVERNRRRQMNEHINSLRALLPPSYIQRGDQASIVGGAINYVKVLEQIIQSLESQKRTQQQSNSEVVENALNHLSGISSNDLWTTLEDQTCIPKIEATVIQNHVSLKVQCEKKQGQLLKGIISLEKLKLTVLHLNITTSSHSSVSYSFNLKMEDECDLESADEITAAVHRIFDIPTI
AT3G62090	MMFLPTDYCCRLSDQEYMELVFENGQILAKGQRSNVSLHNQRTKSIMDLYEAEYNEDFMKSIIHGGGGAITNLGDTQVVPQSHVAAAHETNMLESNKHVDDSETLKASSSKRMMVDYHNRKKIKFIPPDEQSVVADRSFKLGFDTSSVGFTEDSEGSMYLSSSLDDESDDARPQVPARTRKALVKRKRNAEAYNSPERNQRNDINKKMRTLQNLLPNSHKDDNESMLDEAINYMTNLQLQVQMMTMGNRFVTPSMMMPLGPNYSQMGLAMGVGMQMGEQQFLPAHVLGAGLPGINDSADMLRFLNHPGLMPMQNSAPFIPTENCSPQSVPPSCAAFPNQIPNPNSLSNLDGATLHKKSRKTNR
AT4G00050	MSQCVPNCHIDDTPAAATTTVRSTTAADIPILDYEVAELTWENGQLGLHGLGPPRVTASSTKYSTGAGGTLESIVDQATRLPNPKPTDELVPWFHHRSSRAAMAMDALVPCSNLVHEQQSKPGGVGSTRVGSCSDGRTMGGGKRARVAPEWSGGGSQRLTMDTYDVGFTSTSMGSHDNTIDDHDSVCHSRPQMEDEEEKKAGGKSSVSTKRSRAAAIHNQSERKRRDKINQRMKTLQKLVPNSSKTDKASMLDEVIEYLKQLQAQVSMMSRMNMPSMMLPMAMQQQQQLQMSLMSNPMGLGMGMGMPGLGLLDLNSMNRAAASAPNIHANMMPNPFLPMNCPSWDASSNDSRFQSPLIPDPMSAFLACSTQPTTMEAYSRMATLYQQMQQQLPPPSNPK
AT4G00120	MENGMYKKKGVCDSCVSSKSRSNHSPKRSMMEPQPHHLLMDWNKANDLLTQEHAAFLNDPHHLMLDPPPETLIHLDEDEEYDEDMDAMKEMQYMIAVMQPVDIDPATVPKPNRRNVRISDDPQTVVARRRRERISEKIRILKRIVPGGAKMDTASMLDEAIRYTKFLKRQVRILQPHSQIGAPMANPSYLCYYHNSQP
AT4G00480	MSLTMADGVEAAAGRSKRQNSLLRKQLALAVRSVQWSYAIFWSSSLTQPGVLEWGEGCYNGDMKKRKKSYESHYKYGLQKSKELRKLYLSMLEGDSGTTVSTTHDNLNDDDDNCHSTSMMLSPDDLSDEEWYYLVSMSYVFSPSQCLPGRASATGETIWLCNAQYAENKLFSRSLLARSASIQTVVCFPYLGGVIELGVTELISEDHNLLRNIKSCLMEISAHQDNDDEKKMEIKISEEKHQLPLGISDEDLHYKRTISTVLNYSADRSGKNDKNIRHRQPNIVTSEPGSSFLRWKQCEQQVSGFVQKKKSQNVLRKILHDVPLMHTKRMFPSQNSGLNQDDPSDRRKENEKFSVLRTMVPTVNEVDKESILNNTIKYLQELEARVEELESCMGSVNFV…
AT4G00870	MYNLTFSPSLSSSLLSFTQQTPAAIVSSSPPDLVLQQKLRFVVETSPDRWAYVIFWQKMFDDQSDRSYLVWVDGHFCGNKNNNSQENYTTNSIECELMMDGGDDLELFYAASFYGEDRSPRKEVSDESLVWLTGPDELRFSNYERAKEAGFHGVHTLVSIPINNGIIELGSSESIIQNRNFINRVKSIFGSGKTTKHTNQTGSYPKPAVSDHSKSGNQQFGSERKRRRKLETTRVAAATKEKHHPAVLSHVEAEKQRREKLNHRFYALRAIVPKVSRMDKASLLSDAVSYIESLKSKIDDLETEIKKMKMTETDKLDNSSSNTSPSSVEYQVNQKPSKSNRGSDLEVQVKIVGEEAIIRVQTENVNHPTSALMSALMEMDCRVQHANASRLSQVMVQDV…
AT4G02590	MASNNPHDNLSDQTPSDDFFEQILGLPNFSASSAAGLSGVDGGLGGGAPPMMLQLGSGEEGSHMGGLGGSGPTGFHNQMFPLGLSLDQGKGPGFLRPEGGHGSGKRFSDDVVDNRCSSMKPVFHGQPMQQPPPSAPHQPTSIRPRVRARRGQATDPHSIAERLRRERIAERIRALQELVPTVNKTDRAAMIDEIVDYVKFLRLQVKVLSMSRLGGAGAVAPLVTDMPLSSSVEDETGEGGRTPQPAWEKWSNDGTERQVAKLMEENVGAAMQLLQSKALCMMPISLAMAIYHSQPPDTSSVVKPENNPPQ
AT4G05170	MSHATSTLNSKVNYTIKNMTEEFEIAGISTGAWWSSPTNTAAVFSGYSLPCSTEISPDVTNFGWQNFDNKINDHNDGCMNMHNSFFEGLLIDPNDQLLPDPWSKSTIPNAKSELLENFPFLDNMFLVDSEAESLLDHEIRNHKSSKEQITQDYKNLTSKRSEELEENSDEYSPRLLKRPRLETLSPLPSFKVRKEKLGDRITALQQLVSPFGKTDTASVLNEAVEYIKFLQEQVTVLSNPEQNTIGSVQQQQCSNKKSINTQGEVEEDECSPRRYVDLSSRGLCLMPISASYPVAAAAASAAEMNVHLVSGIFHSL
AT4G09180	MQPTSVGSSGGGDDGGGRGGGGGLSRSGLSRIRSAPATWLEALLEEDEEESLKPNLGLTDLLTGNSNDLPTSRGSFEFPIPVEQGLYQQGGFHRQNSTPADFLSGSDGFIQSFGIQANYDYLSGNIDVSPGSKRSREMEALFSSPEFTSQMKGEQSSGQVPTGVSSMSDMNMENLMEDSVAFRVRAKRGCATHPRSIAERVRRTRISDRIRKLQELVPNMDKQTNTADMLEEAVEYVKVLQRQIQELTEEQKRCTCIPKEEQ
AT4G09820	MDESSIIPAEKVAGAEKKELQGLLKTAVQSVDWTYSVFWQFCPQQRVLVWGNGYYNGAIKTRKTTQPAEVTAEEAALERSQQLRELYETLLAGESTSEARACTALSPEDLTETEWFYLMCVSFSFPPPSGMPGKAYARRKHVWLSGANEVDSKTFSRAILAKSAKIQTVVCIPMLDGVVELGTTKKVREDVEFVELTKSFFYDHCKTNPKPALSEHSTYEVHEEAEDEEEVEEEMTMSEEMRLGSPDDEDVSNQNLHSDLHIESTHTLDTHMDMMNLMEEGGNYSQTVTTLLMSHPTSLLSDSVSTSSYIQSSFATWRVENGKEHQQVKTAPSSQWVLKQMIFRVPFLHDNTKDKRLPREDLSHVVAERRRREKLNEKFITLRSMVPFVTKMDKVSILG…
AT4G14410	MYPSLDDDFVSDLFCFDQSNGAELDDYTQFGVNLQTDQEDTFPDFVSYGVNLQQEPDEVFSIGASQLDLSSYNGVLSLEPEQVGQQDCEVVQEEEVEINSGSSGGAVKEEQEHLDDDCSRKRARTGSCSRGGGTKACRERLRREKLNERFMDLSSVLEPGRTPKTDKPAILDDAIRILNQLRDEALKLEETNQKLLEEIKSLKAEKNELREEKLVLKADKEKTEQQLKSMTAPSSGFIPHIPAAFNHNKMAVYPSYGYMPMWHYMPQSVRDTSRDQELRPPAA
AT4G16430	MGQKFWENQEDRAMVESTIGSEACDFFISTASASNTALSKLVSPPSDSNLQQGLRHVVEGSDWDYALFWLASNVNSSDGCVLIWGDGHCRVKKGASGEDYSQQDEIKRRVLRKLHLSFVGSDEDHRLVKSGALTDLDMFYLASLYFSFRCDTNKYGPAGTYVSGKPLWAADLPSCLSYYRVRSFLARSAGFQTVLSVPVNSGVVELGSLRHIPEDKSVIEMVKSVFGGSDFVQAKEAPKIFGRQLSLGGAKPRSMSINFSPKTEDDTGFSLESYEVQAIGGSNQVYGYEQGKDETLYLTDEQKPRKRGRKPANGREEALNHVEAERQRREKLNQRFYALRAVVPNISKMDKASLLADAITYITDMQKKIRVYETEKQIMKRRESNQITPAEVDYQQRHD…
AT4G17880	MSPTNVQVTDYHLNQSKTDTTNLWSTDDDASVMEAFIGGGSDHSSLFPPLPPPPLPQVNEDNLQQRLQALIEGANENWTYAVFWQSSHGFAGEDNNNNNTVLLGWGDGYYKGEEEKSRKKKSNPASAAEQEHRKRVIRELNSLISGGVGGGDEAGDEEVTDTEWFFLVSMTQSFVKGTGLPGQAFSNSDTIWLSGSNALAGSSCERARQGQIYGLQTMVCVATENGVVELGSSEIIHQSSDLVDKVDTFFNFNNGGGEFGSWAFNLNPDQGENDPGLWISEPNGVDSGLVAAPVMNNGGNDSTSNSDSQPISKLCNGSSVENPNPKVLKSCEMVNFKNGIENGQEEDSSNKKRSPVSNNEEGMLSFTSVLPCDSNHSDLEASVAKEAESNRVVVEPEKK…
AT4G20970	MEPSHSNTGQSRSVDRKTVEKNRRMQMKSLYSELISLLPHHSSTEPLTLPDQLDEAANYIKKLQVNVEKKRERKRNLVATTTLEKLNSVGSSSVSSSVDVSVPRKLPKIEIQETGSIFHIFLVTSLEHKFMFCEIIRVLTEELGAEITHAGYSIVDDAVFHTLHCKVEEHDYGARSQIPERLEKIVNSVH
AT4G21330	MGGGSRFQEPVRMSRRKQVTKEKEEDENFKSPNLEAERRRREKLHCRLMALRSHVPIVTNMTKASIVEDAITYIGELQNNVKNLLETFHEMEEAPPEIDEEQTDPMIKPEVETSDLNEEMKKLGIEENVQLCKIGERKFWLKIITEKRDGIFTKFMEVMRFLGFEIIDISLTTSNGAILISASVQTQELCDVEQTKDFLLEVMRSNP
AT4G21340	MTEEFDTTGVCTGTWWSSSNGMFSGCSLPRSAEIVVDFGEIEWQNIDTLDAKTYNENYLSTSTFLGNANLDTTSQIYVSSPSNIHEEERYNQINSFLEGLFDSSEQLLVPNCPKPELFESFHFFDDVFPNESRMISVFDHQKPKEDMQACKSLTTCKRASEKSGELEDIESSQPLKRPRLETPSHFPSFKVRKEKLGDRITALQQLVSPFGKTDTASVLHDAIDYIKFLQEQITEKVSTSPHLNSIGSGEQKQWSDKSSNNTHNQNCSPRQDLRSRGLCLMPISSTFSTPPQHLDTSSLWN
AT4G25400	MNNFQEKKRRRSKTPRVCNNEENMEKLVHKEIEKRRRQEMASLYASLRSLLPLEFIQGKRSTSDQVKGAVNYIDYLQRNIKDINSKRDDLVLLSGRSFRSSNEQEWNEISNHVVIRPCLVGIEIVLSILQTPFSSVLQVLREHGLYVLGYICSSVNDRLIHTLQAEVNDLALIDLADLKDTLTLMK
AT4G25410	MDPYKNLNPKGYQRQRPFSSAGESGGSGGSGTAHETDDNKKKKKLLHRDIERQRRQEMATLFATLRTHLPLKYIKGKRAVSDHVNGAVNFIKDTEARIKELSARRDELSRETGQGYKSNPDPGKTGSDVGKSEPATVMVQPHVSGLEVVVSSNSSGPEALPLSKVLETIQEKGLEVMSSFTTRVNDRLMHTIQVEVNSFGCIDLLWLQQKLVEDLILSTGY
AT4G28790	MTWKPKMLILSHDLISPEKYIMGEDDIVELLGKSSQVVTSSQTQTPSCDPPLILRGSGSGDGEGNGPLPQPPPPLYHQQSLFIQEDEMASWLHQPNRQDYLYSQLLYSGVASTHPQSLASLEPPPPPRAQYILAADRPTGHILAERRAENFMNISRQRGNIFLGGVEAVPSNSTLLSSATESIPATHGTESRATVTGGVSRTFAVPGLGPRGKAVAIETAGTQSWGLCKAETEPVQRQPATETDITDERKRKTREETNVENQGTEEARDSTSSKRSRAAIMHKLSERRRRQKINEMMKALQELLPRCTKTDRSSMLDDVIEYVKSLQSQIQMFSMGHVMIPPMMYAGNIQQQYMPHMAMGMNRPPAFIPFPRQAHMAEGVGPVDLFRENEETEQETMSL…
AT4G28811	MGEDDIVELLWNGQVVRTSQPQRPSSGKPSPTPPILRGSGSGSGEENAPLPLPLLQPPRPLHHQNLFIREEEMSSWLHYSYTGVTSTPATHPQSSVSLPPPPPIAPSEDDVVELLWKSGQVVQSIQTQRPIPPPIFRGSGSGGGEETVLPLPPLHPSHQNIFIQEDEMASWLYHPLRQDYFSSGVASTSATRPQSSASLAPTPPPPSVPYGQIPVERRTENFMNFLRLRGNIFSGGRVEAGPVVIESTQIGSSATPSSSAAESCVIPATHGTESRAAAITGVSRTFAVPGLGRRGKEVATETAGTSYSGVNKAETERVQIQPERETKITEDKKREETIAEIQGTEEAHGSTSRKRSRAADMHNLSERRRRERINERMKTLQELLPRCRKTDKVSMLEDV…
AT4G28815	MMIISSQILLLFGFKLFFETRGEDDIVELLCKIGQTQIPSSDPLPILRGSGSGGREENTPLPPPLPHQNLFIQEDEMSSWPHHPLRQDYLCSELYASTPAPHPQSSVSLAPPPPKPPSSAPYGQIIAPRSAPRIQGTEEARGSTSRKRSRAAEMHNLAERRRREKINERMKTLQQLIPRCNKSTKVSMLEDVIEYVKSLEMQINQFMPHMAMGMNQPPAYIPFPSQAHMAGVGPSYPPPRYPFPNIQTFDPSRVWLQSPQPNPVSNQPQMNPYGQFVGHHQMQQSLPPPLQVILSQYPLCLFLCSNK
AT4G29100	MNRGVLESSPVQQLMAAGNPNWWNVSGGMRPPPPLMGHQQAPLPPHMTPNNNYLRPRMMPTPFPHFLPSPATSSSSSSSSPSLPNNPNLSSWLESNDLPPESWSLSQLLLGGLMMGEEERLEMMNHHNHHDEQQHHGFQGKIRLENWEEQVLSHQQASMVAVDIKQEGNINNNNGYVISSPNSPPNKSCVTTTTTTSLNSNDDNINNNNNMLDFSSNHNGLHLSEGRHTPPDRSSECNSLEIGGSTNKKPRLQPSPSSQSTLKVRKEKLGGRIAALHQLVSPFGKTDTASVLSEAIGYIRFLQSQIEALSHPYFGTTASGNMRHQQHLQGDRSCIFPEDPGQLVNDQCMKRRGASSSSTDNQNASEEPKKDLRSRGLCLVPISCTLQVGSDNGADYWAP…
AT4G29930	MEDLDHEYKNYWETTMFFQNQELEFDSWPMEEAFSGSGESSSPDGAATSPASSKNVVSERNRRQKLNQRLFALRSVVPNISKLDKASVIKDSIDYMQELIDQEKTLEAEIRELESRSTLLENPVRDYDCNFAETHLQDFSDNNDMRSKKFKQMDYSTRVQHYPIEVLEMKVTWMGEKTVVVCITCSKKRETMVQLCKVLESLNLNILTTNFSSFTSRLSTTLFLQVTLSLSPSLISLFGNVITSTNYKILNASREYCTCLVLV
AT4G30180	MERQIINRKKRVFSLEPNKNPSAVFTRKYTSHLVPALKKLNMNKNSSKQTVKHEVDMALALSAQEFAWSRFLLQKLSSSSNPTTTTSSSSDGIRILERPDKEGGNEEGGIEERLRELKKLLPGGEEMNVEEMLSEIGNYIKCLELQTIALKSIVQDST
AT4G30410	MQPTSSMNEEFLKKWQMGLQIFRPSIDNTSVHERKKAIKLSADVAMASLRKGTTCWSRALIEKTATEDNFLVRQMLSGIKAETLINKKLPKKTVCHRKIVRRSKKILRRKSKSASEEAAAKAKRLVKRRTQGLRNVVPGGELMSNDVLLLQETLDYIVSLQTQVNVMRSIVDAAEAEIER
AT4G30980	MNSSSLLTPSSSPSPHLQSPATFDHDDFLHHIFSSTPWPSSVLDDTPPPTSDCAPVTGFHHHDADSRNQITMIPLSHNHPNDALFNGFSTGSLPFHLPQGSGGQTQTQSQATASATTGGATAQPQTKPKVRARRGQATDPHSIAERLRRERIAERMKSLQELVPNGNKTDKASMLDEIIDYVKFLQLQVKVLSMSRLGGAASASSQISEDAGGSHENTSSSGEAKMTEHQVAKLMEEDMGSAMQYLQGKGLCLMPISLATTISTATCPSRSPFVKDTGVPLSPNLSTTIVANGNGSSLVTVKDAPSVSKP
AT4G33880	MEAMGEWSNNLGGMYTYATEEADFMNQLLASYDHPGTGSSSGAAASGDHQGLYWNLGSHHNHLSLVSEAGSFCFSQESSSYSAGNSGYYTVVPPTVEENQNETMDFGMEDVTINTNSYLVGEETSECDVEKYSSGKTLMPLETVVENHDDEESLLQSEISVTTTKSLTGSKKRSRATSTDKNKRARVNKRAQKNVEMSGDNNEGEEEEGETKLKKRKNGAMMSRQNSSTTFCTEEESNCADQDGGGEDSSSKEDDPSKALNLNGKTRASRGAATDPQSLYARKRRERINERLRILQNLVPNGTKVDISTMLEEAVHYVKFLQLQIKLLSSDDLWMYAPIAFNGMDIGLSSPR
AT4G34530	MNGAIGGDLLLNFPDMSVLERQRAHLKYLNPTFDSPLAGFFADSSMITGGEMDSYLSTAGLNLPMMYGETTVEGDSRLSISPETTLGTGNFKKRKFDTETKDCNEKKKKMTMNRDDLVEEGEEEKSKITEQNNGSTKSIKKMKHKAKKEENNFSNDSSKVTKELEKTDYIHVRARRGQATDSHSIAERVRREKISERMKFLQDLVPGCDKITGKAGMLDEIINYVQSLQRQIEFLSMKLAIVNPRPDFDMDDIFAKEVASTPMTVVPSPEMVLSGYSHEMVHSGYSSEMVNSGYLHVNPMQQVNTSSDPLSCFNNGEAPSMWDSHVQNLYGNLGV
AT4G36060	MDQPMKPKTCSESDFADDSSASSSSSSGQNLRGAEMVVEVKKEAVCSQKAEREKLRRDKLKEQFLELGNALDPNRPKSDKASVLTDTIQMLKDVMNQVDRLKAEYETLSQESRELIQEKSELREEKATLKSDIEILNAQYQHRIKTMVPWVPHYSYHIPFVAITQGQSSFIPYSASVNPLTEQQASVQQHSSSSADASMKQDSKIKPLDLDLMMNSNHSGQGNDQKDDVRLKLELKIHASSLAQQDVSGKEKKVSLTTTASSSNSYSLSQAVQDSSPGTVNDMLKP
AT4G36930	MISQREEREEKKQRVMGDKKLISSSSSSSVYDTRINHHLHHPPSSSDEISQFLRHIFDRSSPLPSYYSPATTTTTASLIGVHGSGDPHADNSRSLVSHHPPSDSVLMSKRVGDFSEVLIGGGSGSAAACFGFSGGGNNNNVQGNSSGTRVSSSSVGASGNETDEYDCESEEGGEAVVDEAPSSKSGPSSRSSSKRCRAAEVHNLSEKRRRSRINEKMKALQSLIPNSNKTDKASMLDEAIEYLKQLQLQVQMLTMRNGINLHPLCLPGTTLHPLQLSQIRPPEATNDPLLNHTNQFASTSNAPEMINTVASSYALEPSIRSHFGPFPLLTSPVEMSREGGLTHPRLNIGHSNANITGEQALFDGQPDLKDRIT
AT4G37850	MSILSTRWFSEQEIEENSIIQQFHMNSIVGEVQEAQYIFPHSFTTNNDPSYDDLIEMKPPKILETTYISPSSHLPPNSKPHHIHRHSSSRILSFEDYGSNDMEHEYSPTYLNSIFSPKLEAQVQPHQKSDEFNRKGTKRAQPFSRNQSNAQDHIIAERKRREKLTQRFVALSALVPGLKKMDKASVLGDALKHIKYLQERVGELEEQKKERRLESMVLVKKSKLILDDNNQSFSSSCEDGFSDLDLPEIEVRFSDEDVLIKILCEKQKGHLAKIMAEIEKLHILITNSSVLNFGPTLDITIIAKKESDFDMTLMDVVKSLRSALSNFI
AT5G01310	MEVQIEESGKNQTSPESIEADKAKQIVVLLIGPPGSGKSTFCDTAMRSSHRPWSRICQDIVNNGKAGTKAQCLKMATDSLREGKSVFIDRCNLDREQRSEFIKLGGPEFEVHAVVLELPAQVCISRSVKRTGHEGNLQGGRAAAVVNKMLQSKELPKVNEGFSRIMFCYSDADVDNAVNMYNKLGPMDTLPSGCFGEKKLDTKSQPGIMKFFKKVSALPASSSNEATNTTRKADEMTANVRVSPVKLGSADIVPTLAFPSISTADFQFDLEKASDIIVEKAEEFLSKLGTARLVLVDLSRGSKILSLVKAKASQKNIDSAKFFTFVGDITKLRSEGGLHCNVIANATNWRLKPGGGGVNAAIFKAAGPDLETATRVRANTLLPGKAVVVPLPSTCPLHN…
AT5G04150	MCTLTPMFPSKQQEWYSASTMEYPWLQSQVHSFSPTLHFPSFLHPLDDSKSHNINLHHMSLSHSNNTNSNNNNYQEEDRGAVVLEKKLNHNASERDRRRKLNALYSSLRALLPLSDQKRKLSIPMTVARVVKYIPEQKQELQRLSRRKEELLKRISRKTHQEQLRNKAMMDSIDSSSSQRIAANWLTDTEIAVQIATSKWTSVSDMLLRLEENGLNVISVSSSVSSTARIFYTLHLQMRGDCKVRLEELINGMLLGLRQS
AT5G08130	MELPQPRPFKTQEFRTGRKPTHDFLSLCSHSTVHPDPKPTPPPSSQGSHLKTHDFLQPLECVGAKEDVSRINSTTTASEKPPPPAPPPPLQHVLPGGIGTYTISPIPYFHHHHQRIPKPELSPPMMFNANERNVLDENSNSNCSSYAAASSGFTLWDESASGKKGQTRKENSVGERVNMRADVAATVGQWPVAERRSQSLTNNHMSGFSSLSSSQGSVLKSQSFMDMIRSAKGSSQEDDLDDEEDFIMKKESSSTSQSHRVDLRVKADVRGSPNDQKLNTPRSKHSATEQRRRSKINDRFQMLRQLIPNSDQKRDKASFLLEVIEYIQFLQEKADKYVTSYQGWNHEPAKLLNWSNNNQQLVPEGVAFAPKLEEEKNNIPVSVLATAQGVVIDHPTTAT…
AT5G09460	MPLDTKQQKWLPLGLNPQACVQDKATEYFRPGIPFPELGKVYAAEHQFRYLQPPFQALLSRYDQQSCGKQVSCLNGRSSNGAAPEGALKSSRKRFIVFDQSGEQTRLLQCGFPLRFPSSMDAERGNILGALHPEKGFSKDHAIQEKILQHEDHENGEEDSEMHEDTEEINALLYSDDDDNDDWESDDEVMSTGHSPFTVEQQACNITTEELDETESTVDGPLLKRQKLLDHSYRDSSPSLVGTTKVKGLSDENLPESNISSKQETGSGLSDEQSRKDKIHTALRILESVVPGAKGKEALLLLDEAIDYLKLLKQSLNSSKGLNNHW
AT5G09750	MNNYNMNPSLFQNYTWNNIINSSNNNNKNDDHHHQHNNDPIGMAMDQYTQLHIFNPFSSSHFPPLSSSLTTTTLLSGDQEDDEDEEEPLEELGAMKEMMYKIAAMQSVDIDPATVKKPKRRNVRISDDPQSVAARHRRERISERIRILQRLVPGGTKMDTASMLDEAIRYVKFLKRQIRLLNNNTGYTPPPPQDQASQAVTTSWVSPPPPPSFGRGGRGVGELI
AT5G10570	METELTQLRKQESNNLNGVNGGFMAIDQFVPNDWNFDYLCFNNLLQEDDNIDHPSSSSLMNLISQPPPLLHQPPQPSSPLYDSPPLSSAFDYPFLEDIIHSSYSPPPLILPASQENTNNYSPLMEESKSFISIGETNKKRSNKKLEGQPSKNLMAERRRRKRLNDRLSLLRSIVPKITKMDRTSILGDAIDYMKELLDKINKLQEDEQELGSNSHLSTLITNESMVRNSLKFEVDQREVNTHIDICCPTKPGLVVSTVSTLETLGLEIEQCVISCFSDFSLQASCFEVGEQRYMVTSEATKQALIRNAGYGGRCL
AT5G37800	MSLINEHCNERNYISTPNSSEDLSSPQNCGLDEGASASSSSTINSDHQNNQGFVFYPSGETIEDHNSLMDFNASSFFTFDNHRSLISPVTNGGAFPVVDGNMSYSYDGWSHHQVDSISPRVIKTPNSFETTSSFGLTSNSMSKPATNHGNGDWLYSGSTIVNIGSRHESTSPKLAGNKRPFTGENTQLSKKPSSGTNGKIKPKATTSPKDPQSLAAKNRRERISERLKVLQELVPNGTKVDLVTMLEKAIGYVKFLQVQVKVLAADEFWPAQGGKAPDISQVKEAIDAILSSSQRDSNSTRETSIAE
AT5G38860	MNSHDIDDQLEADVYSNLPSRNDSSTGRRNRNSCRSKHSETEQRRRSKINERFQSLMDIIPQNQNDQKRDKASFLLEVIEYIHFLQEKVHMYEDSHQMWYQSPTKLIPWRNSHGSVAEENDHPQIVKSFSSNDKVAASSGFLLDTYNSVNPDIDSAVSTKIPEHSPVSAVSSYLRTEPSLQFVQHDFWQPKTSCGTINCFTNELLTSDEKTSASLSTVCSQRVLNTLTEALKSSGVNMSETMISVQLSLRKREDREYSVAAFASEDNGNSIADEEGDSPTETRSFCNDIDHSQKRIRR
AT5G41315	MATGQNRTTVPENLKKHLAVSVRNIQWSYGIFWSVSASQSGVLEWGDGYYNGDIKTRKTIQASEIKADQLGLRRSEQLSELYESLSVAESSSSGVAAGSQVTRRASAAALSPEDLADTEWYYLVCMSFVFNIGEGMPGRTFANGEPIWLCNAHTADSKVFSRSLLAKSAAVKTVVCFPFLGGVVEIGTTEHITEDMNVIQCVKTSFLEAPDPYATILPARSDYHIDNVLDPQQILGDEIYAPMFSTEPFPTASPSRTTNGFDQEHEQVADDHDSFMTERITGGASQVQSWQLMDDELSNCVHQSLNSSDCVSQTFVEGAAGRVAYGARKSRVQRLGQIQEQQRNVKTLSFDPRNDDVHYQSVISTIFKTNHQLILGPQFRNCDKQSSFTRWKKSSSSSS…
AT5G43175	MENEAFVDGELESLLGMFNFDQCSSNESSFCNAPNETDVFSSDDFFPFGTILQSNYAAVLDGSNHQTNRNVDSRQDLLKPRKKQKLSSESNLVTEPKTAWRDGQSLSSYNSSDDEKALGLVSNTSKSLKRKAKANRGIASDPQSLYARKRRERINDRLKTLQSLVPNGTKVDISTMLEDAVHYVKFLQLQIKLLSSEDLWMYAPLAHNGLNMGLHHNLLSRLI
AT5G43650	MDNFFLGLSCQEENNFWDLIVADISGDRSVSVPIRSAFRSYMKDTELRMMSPKISSSKVNVKKRMVNLLRKNWEEKKNTVAPEKERSRRHMLKERTRREKQKQSYLALHSLLPFATKNDKNSIVEKAVDEIAKLQRLKKELVRRIKVIEEKSAKDGHDEMSETKVRVNLKEPLSGLDSMLEALHYLKSMGTKLKTVHANFSPQEFSATMTIETQIRGEEVEKRVERRLQETEWKLLFLPEASFYKDY
AT5G46690	MTLEALSSNGLLNFLLSETLSPTPFKSLVDLEPLPENDVIISKNTISEISNQEPPPQRQPPATNRGKKRRRRKPRVCKNEEEAENQRMTHIAVERNRRRQMNQHLSVLRSLMPQPFAHKGDQASIVGGAIDFIKELEHKLLSLEAQKHHNAKLNQSVTSSTSQDSNGEQENPHQPSSLSLSQFFLHSYDPSQENRNGSTSSVKTPMEDLEVTLIETHANIRILSRRRGFRWSTLATTKPPQLSKLVASLQSLSLSILHLSVTTLDNYAIYSISAKVEESCQLSSVDDIAGAVHHMLSIIEEEPFCCSSMSELPFDFSLNHSNVTHSL
AT5G46760	MNGTTSSINFLTSDDDASAAAMEAFIGTNHHSSLFPPPPQQPPQPQFNEDTLQQRLQALIESAGENWTYAIFWQISHDFDSSTGDNTVILGWGDGYYKGEEDKEKKKNNTNTAEQEHRKRVIRELNSLISGGIGVSDESNDEEVTDTEWFFLVSMTQSFVNGVGLPGESFLNSRVIWLSGSGALTGSGCERAGQGQIYGLKTMVCIATQNGVVELGSSEVISQSSDLMHKVNNLFNFNNGGGNNGVEASSWGFNLNPDQGENDPALWISEPTNTGIESPARVNNGNNSNSNSKSDSHQISKLEKNDISSVENQNRQSSCLVEKDLTFQGGLLKSNETLSFCGNESSKKRTSVSKGSNNDEGMLSFSTVVRSAANDSDHSDLEASVVKEAIVVEPPEKKP…
AT5G46830	MINTDDNLLMIEALLTSDPSPPLLPANLSLETTLPKRLHAVLNGTHEPWSYAIFWKPSYDDFSGEAVLKWGDGVYTGGNEEKTRGRLRRKKTILSSPEEKERRSNVIRELNLMISGEAFPVVEDDVSDDDDVEVTDMEWFFLVSMTWSFGNGSGLAGKAFASYNPVLVTGSDLIYGSGCDRAKQGGDVGLQTILCIPSHNGVLELASTEEIRPNSDLFNRIRFLFGGSKYFSGAPNSNSELFPFQLESSCSSTVTGNPNPSPVYLQNRYNLNFSTSSSTLARAPCGDVLSFGENVKQSFENRNPNTYSDQIQNVVPHATVMLEKKKGKKRGRKPAHGRDKPLNHVEAERMRREKLNHRFYALRAVVPNVSKMDKTSLLEDAVCYINELKSKAENVELEK…
AT5G48560	MDNELFMNTEFPPPPEMATHFEHQQSSSSAMMLNWALMDPNPHQDSSFLWEKSTEQQQQQSIFDSALSSLVSSPTPSNSNFSGGGGDGFLIRELIGKLGNIGNNNNNSGEIYGTPMSRSASCYATPMSSPPPPTNSNSQMMMNRTTPLTEFSADPGFAERAARFSCFGSRSFNGRTNTNLPINNGNNMVNNSGKLTRVSSTPALKALVSPEVTPGGEFSRKRKSVPKGKSKENPISTASPSPSFSKTAEKNGGKGGSKSSEEKGGKRRREEEDDEEEEGEGEGNKSNNTKPPEPPKDYIHVRARRGQATDSHSLAERVRREKIGERMKLLQDLVPGCNKVTGKALMLDEIINYVQSLQRQVEFLSMKLSSVNDTRLDFNVDALVSKDVMIPSSNNRLHE…
AT5G50010	MGQDRGFGFPTQRLCSLSSLALSHLGKQDLNLVSKTCGDTTDMFSTRGSYQVSTQVSQSYFDGYCGWVHGSSHLQQQFLPPQNQCMKQVPLQVDGVISKAEEQCSQKRFLVFDQSGDQTTLLLASDIRKSFETLKQHACPDMKEELQRSNKDLFVCHGMQGNSEPDLKEDSEELNALLYSEDESGYCSEEDEVTSADHSPSIVVSGREDQKTFLGSYGQPLNAKKRKILETSNESMRDAESSCGSCDNTRISFLKRSKLSSNKIGEEKIFETVSLLRSVVPGEELVDPILVIDRAIDYLKSLKMEAKNREA
AT5G50915	MATFSYFQNYPHSLLDPLLFPTPHSSINLTSFIDQNHLYPLPNISTVEDISFLEYNVDKTENSGSEKLANTTKTATTGSSSCDQLSHGPSAITNTGKTRGRKARNSNNSKEGVEGRKSKKQKRGSKEEPPTDYIHVRARRGQATDSHSLAERVRREKISERMRTLQNLVPGCDKVTGKALMLDEIINYVQTLQTQVEFLSMKLTSISPVVYDFGSDLDGLILQSEMGSPEVGTSFTNAMPTTTPIFPSLLDNSVVPTHAQVQEEGEERENFVDRSGFNNNNFCSFP
AT5G51780	MEKMMHRETERQRRQEMASLYASLRSLLPLHFIKGKRSTSDQVNEAVNYIKYLQRKIKELSVRRDDLMVLSRGSLLGSSNGDFKEDVEMISGKNHVVVRQCLVGVEIMLSSRCCGGQPRFSSVLQVLSEYGLCLLNSISSIVDDRLVYTIQAEVNDMALMIDLAELEKRLIRMK
AT5G51790	MNPSNNPKKTRHQSHMPQERDETKKEKKLLHRNIERQRRQEMAILFASLRSQLPLKYIKGKRAMSDHVNGAVSFIKDTQTRIKDLSARRDELKREIGDPTSLTGSGSGSGSSRSEPASVMVQPCVSGFEVVVSSLASGLEAWPLSRVLEVLHGQGLEVISSLTARVNERLMYTIQVEVNSFDCFDLAWLQQKLIEQLVLSTTRH
AT5G53210	MQEIIPDFLEECEFVDTSLAGDDLFAILESLEGAGEISPTAASTPKDGTTSSKELVKDQDYENSSPKRKKQRLETRKEEDEEEEDGDGEAEEDNKQDGQQKMSHVTVERNRRKQMNEHLTVLRSLMPCFYVKRGDQASIIGGVVEYISELQQVLQSLEAKKQRKTYAEVLSPRVVPSPRPSPPVLSPRKPPLSPRINHHQIHHHLLLPPISPRTPQPTSPYRAIPPQLPLIPQPPLRSYSSLASCSSLGDPPPYSPASSSSSPSVSSNHESSVINELVANSKSALADVEVKFSGANVLLKTVSHKIPGQVMKIIAALEDLALEILQVNINTVDETMLNSFTIKIGIECQLSAEELAQQIQQTFC
AT5G54680	MVSPENANWICDLIDADYGSFTIQGPGFSWPVQQPIGVSSNSSAGVDGSAGNSEASKEPGSKKRGRCESSSATSSKACREKQRRDRLNDKFMELGAILEPGNPPKTDKAAILVDAVRMVTQLRGEAQKLKDSNSSLQDKIKELKTEKNELRDEKQRLKTEKEKLEQQLKAMNAPQPSFFPAPPMMPTAFASAQGQAPGNKMVPIISYPGVAMWQFMPPASVDTSQDHVLRPPVA
AT5G56960	MMHLILSCSYLISMDGYYNEASEEPSSSSSSGSLARSLFHEYRQSVIPLQNGHVPSMAFMNNLPYVEIRPQESQRLAFNDTQRLFYQMKIEASLREWFPEDFNRKSSPANSDYLRPPHYPSSSSSSLSPNNISEYSSLLFPLIPKPSTTTEAVNVPVLPPLAPINMIHPQHQEPLFRNRQREEEAMTQAILAVLTGPSSPPSTSSSPQRKGRATAFKRYYSMISDRGRAPLPSVRKQSMMTRAMSFYNRLNINQRERFTRENATTHGEGSGGSGGGGRYTSGPSATQLQHMISERKRREKLNESFQALRSLLPPGTKKDKASVLSIAREQLSSLQGEISKLLERNREVEAKLAGEREIENDLRPEERFNVRIRHIPESTSRERTLDLRVVLRGDIIRVD…
AT5G57150	MEDIVDQELSNYWEPSSFLQNEDFEYDRSWPLEEAISGSYDSSSPDGAASSPASKNIVSERNRRQKLNQRLFALRSVVPNITKMDKASIIKDAISYIEGLQYEEKKLEAEIRELESTPKSSLSFSKDFDRDLLVPVTSKKMKQLDSGSSTSLIEVLELKVTFMGERTMVVSVTCNKRTDTMVKLCEVFESLNLKILTSNLTSFSGMIFHTVFIELRPNIYWVVWFLVFMSIFGPTIIVIWSIWFIKKKIILSLWRMKKNKRCCG
AT5G58010	MENGNGEGKGEFINQNNDFFLDSMSMLSSLPPCWDPSLPPPPPPPQSLFHALAVDAPFPDQFHHPQESGGPTMGSQEGLQPQGTVSTTSAPVVRQKPRVRARRGQATDPHSIAERLRRERIAERMKSLQELVPNTNKTDKASMLDEIIEYVRFLQLQVKVLSMSRLGGAGSVGPRLNGLSAEAGGRLNALTAPCNGLNGNGNATGSSNESLRSTEQRVAKLMEEDMGSAMQYLQGKGLCLMPISLATAISSSTTHSRGSLFNPISSAVAAEDSNVTATAVAAPEASSTMDDVSASKA
AT5G61270	MSNYGVKELTWENGQLTVHGLGDEVEPTTSNNPIWTQSLNGCETLESVVHQAALQQPSKFQLQSPNGPNHNYESKDGSCSRKRGYPQEMDRWFAVQEESHRVGHSVTASASGTNMSWASFESGRSLKTARTGDRDYFRSGSETQDTEGDEQETRGEAGRSNGRRGRAAAIHNESERRRRDRINQRMRTLQKLLPTASKADKVSILDDVIEHLKQLQAQVQFMSLRANLPQQMMIPQLPPPQSVLSIQHQQQQQQQQQQQQQQQQQFQMSLLATMARMGMGGGGNGYGGLVPPPPPPPMMVPPMGNRDCTNGSSATLSDPYSAFFAQTMNMDLYNKMAAAIYRQQSDQTTKVNIGMPSSSSNHEKRD
AT5G62610	MDPPLVNDSSFSAANPSSYTLSEIWPFPVNDAVRSGLRLAVNSGRVFTRSEHSGNKDVSAAEESTVTDLTAGWGSRKTRDLNSEDDSSKMVSSSSSGNELKESGDKKRKLCGSESGNGDGSMRPEGETSSGGGGSKATEQKNKPEPPKDYIHVRARRGQATDRHSLAERARREKISEKMTALQDIIPGCNKIIGKALVLDEIINYIQSLQRQVEFLSMKLEVVNSGASTGPTIGVFPSGDLGTLPIDVHRTIYEQQEANETRVSQPEWLHMQVDGNFNRTT
AT5G67060	MDSDIMNMMMHQMEKLPEFCNPNSSFFSPDHNNTYPFLFNSTHYQSDHSMTNEPGFRYGSGLLTNPSSISPNTAYSSVFLDKRNNSNNNNNGTNMAAMREMIFRIAVMQPIHIDPEAVKPPKRRNVRISKDPQSVAARHRRERISERIRILQRLVPGGTKMDTASMLDEAIHYVKFLKKQVQSLEEQAVVTGGGGGGGGRVLIGGGGMTAASGGGGGGGVVMKGCGTVGTHQMVGNAQILR
AT5G67110	MGDSDVGDRLPPPSSSDELSSFLRQILSRTPTAQPSSPPKSTNVSSAETFFPSVSGGAVSSVGYGVSETGQDKYAFEHKRSGAKQRNSLKRNIDAQFHNLSEKKRRSKINEKMKALQKLIPNSNKTDKASMLDEAIEYLKQLQLQVQTLAVMNGLGLNPMRLPQVPPPTHTRINETLEQDLNLETLLAAPHSLEPAKTSQGMCFSTATLL
At4G38071	MVLLHHVSLSHYQNSSSLFSSSSESILCLFLVLCVMQLEQGMRPISRCYNPTAYSTTMGRSFFAGAATSSKLFSRGFSVTKPKSKTESKEVAAKKHSDAERRRRLRINSQFATLRTILPNLVKQDKASVLGETVRYFNELKKMVQDIPTTPSLEDNLRLDHCNNNRDLARVVFSCSDREGLMSEVAESMKAVKAKAVRAEIMTVGGRTKCALFVQGVNGNEGLVKLKKSLKLVVNGKSSSEAKNNNNGGSLLIQQQ
AT1G12540	MNFPDSSLFTPNFAYENDLDFSSLITPSTRVSFQEPKPCNPVIHSAGIENDGRQNCETTMTLSEIMKGDDEPKNKRAKHKELERQRRQENTSLFKILRYLLPSQYIKGKRSSADHVLEAVNYIKDLQKKIKEVSEKRDRIKRSITHPSSRGEFSIRSLASSTCSCVGDTNIAVVVRPCLIGLEIVVSCCNRHESCLSSVLQLLAQEQCFNIVSCISTRLHQGFIHTIASEVEEGIEVYFSELQEKIIKIGTSRVTTR
At2g20095	MNRGVLESSPVQHLTAAGNPNWWNNVSRGLRPPTPLMSHEPPSTTAFIPSLLPNFFSSPTSSSSSSPSFPPPNSNPNFSSWLEMSDLPLDQPWSLSQLLLGGLMMGEEEKMEMMNHHHHQNQHQSYQAKRIQNWEEQVLRHQASMKQESSNNNSYGIMSSPNSPPNKSCATIINTNEDNNNNIHSGLNLSECNSSEMIGSSFANKKPKLQVPSSQSTLKVRKEKLGGRIASLHQLVSPFGKTDTASVLSEAIGYIRFLHSQIEALSLPYFGTPSRNNMMHQHAQRNMNGIFPEDPGQLVNEYCMKRGVSLSSTDNQKSNPNEEPMKDLRSRGLCLVPISCTLQVGSDNGADYWAPAFGTTLQ
AT1G27740	MDVFVDGELESLLGMFNFDQCSSSKEERPRDELLGLSSLYNGHLHQHQHHNNVLSSDHHAFLLPDMFPFGAMPGGNLPAMLDSWDQSHHLQETSSLKRKLLDVENLCKTNSNCDVTRQELAKSKKKQRVSSESNTVDESNTNWVDGQSLSNSSDDEKASVTSVKGKTRATKGTATDPQSLYARKRREKINERLKTLQNLVPNGTKVDISTMLEEAVHYVKFLQLQIKLLSSDDLWMYAPLAYNGLDMGFHHNLLSRLM
AT1G30670	MIIPETDSFFFQEQPQHQPLYPDEALSPSLFGFDHYDHFYESFLPSQEIFLPSPKTRVFNESQELDSFHTPKHQKLIDSSFHFNSHDPFSPSPESNYLLDSYITEASNISKFQAPDFSSTFKVGWTEQGDTKKRELSAQSIAARKRRRRITEKTQELGKLIPGSQKHNTAEMFNAAAKYVKFLQAQIEILQLKQTKMQTLDSSKVGREMQFLLGSQEIQEKLSTEEVCVVPREMVQVLKAEECILTNPKISRDINKLLSTNLMN
AT2G34820	MSMDCLSYFFNYDPPVQLQDCFIPEMDMIIPETDSFFFQSQPQLEFHQPLFQEEAPSQTHFDPFCDQFLSPQEIFLPNPKNEIFNETHDLDFFLPTPKRQRLVNSSYNCNTQNHFQSRNPNFFDPFGDTDFVPESCTFQEFRVPDFSLAFKVGRGDQDDSKKPTLSSQSIAARGRRRRIAEKTHELGKLIPGGNKLNTAEMFQAAAKYVKFLQSQVGILQLMQTTKKGSSNVQMETQYLLESQAIQEKLSTEEVCLVPCEMVQDLTTEETICRTPNISREINKLLSKHLAN
AT2G40200	MENSYDSSKWSDSTTPYMVSWSLQSESSDSDWNRFNLGFSSSSFGGNFPADDCVGGIEKAESLSRSHRLAEKRRRDRINSHLTALRKLVPNSDKLDKAALLATVIEQVKELKQKAAESPIFQDLPTEADEVTVQPETISDFESNTNTIIFKASFCCEDQPEAISEIIRVLTKLQLETIQAEIISVGGRMRINFILKDSNCNETTNIAASAKALKQSLCSALNRITSSSTTTSSVCRIRSKRQRWFLSSHYSHNE
AT4G01460	MSGLMSFGELEDQFGQISDTTMEEKIPFLQMLQCIEHPFTTTEPNQFLQSLLQIQTLESKSCLTLETNIKRDPGQTDDPEKDPRTENGAVTVKEKRKRKRTRAPKNKDEVENQRMTHIAVERNRRRQMNEHLNSLRSLMPPSFLQRGDQASIVGGAIDFIKELEQLLQSLEAEKRKDGTDETPKTASCSSSSSLACTNSSISSVSTTSENGFTARFGGGDTTEVEATVIQNHVSLKVRCKRGKRQILKAIVSIEELKLAILHLTISSSFDFVIYSFNLKMEDGCKLGSADEIATAVHQIFEQINGEVMWSNLSRT
AT4G28800	MQFDESDARVWIWFEIRREDDIVELLWQSGQVVGTNQTHRQSYDPPPILRGSGSGRGEENAPLSQPPPHLHQQNLFIQEGEMYSWLHHSYRQNYFCSELLNSTPATHPQSSISLAPRQTIATRRAENFMNFSWLRGNIFTGGRVDEAGPSFSVVRESMQVGSNTTPPSSSATESCVIPATEGTASRVSGTLAAHDLGRKGKAVAVEAAGTPSSGVCKAETEPVQIQPATESKLKAREETHGTEEARGSTSRKRSRTAEMHNLAERRRREKINEKMKTLQQLIPRCNKSTKVSTLDDAIEYVKSLQSQIQMMSTGQGMMSPMMNAGNTQQFMPHMAMDMNRPPPFIPFPGTSFPMPAQMAGVGPSYPAPRYPFPNIQTFDPSRVRLPSPQPNPVSNQPQF…
AT4G36540	MDLSVLDRLKWLQQQQMVSPEFLQILGSDGREELKRVESYLGNNNDELQSFRHFPEFGPDYDTTDGCISRTSSFHMEPVKNNGHSRAITLQNKRKPEGKTEKREKKKIKAEDETEPSMKGKSNMSNTETSSEIQKPDYIHVRARRGEATDRHSLAERARREKISKKMKCLQDIVPGCNKVTGKAGMLDEIINYVQSLQQQVEFLSMKLSVINPELECHIDDLSAKQFQAYFTGPPEGDSKQSIMADFRSFPLHQQGSLDYSVINSDHTTSLGAKDHTSSSWETHSQCLYNSLRTDSVSNFFSLK
LOC_Os01g01600	MMASSSSSSSLCDNHLLQDDLIPWPSMPFAPAPNTFGLNHQWSQPPMLSSSTDQLSSYELESLQSVESQLAAAAPPTLSPHLQAHQLSTVLMMQELGFQWSSCAAPADQHSIASSTNNNSNVMMNEEELRPRPDQSLISNPRSCSATTLLPPPHLHLDGAVLPSINVSRLQKLAAGDEPLQICCKRQAAAAAVVGHSSIRDEHVPCPYAGPPAHLIQGPSNTLQMKRNTNAAAQGRGGRHGSSTEHRSSTALPPSSKKPRLESHSSSMLPSFKVRKEKLGDRIAALQQLVSPFGKTDTASVLMEAIGYIKFLQDQVETLSGPYLRSSKNSKKLACRAAQQQRKGTSNGGDAAAKLDLRSRGLCLVPLSCTSYVTNENGVWPPPNFRGN*
LOC_Os01g01840	MDQEKADGGGRRRRSRATSSSGSGASSTAAAAAAERKEMERRRRQDMKGLCVKLASLIPKEHCSMSKMQAASRTQLGSLDEAAAYIKKLKERVDELHHKRSMMSITSSRCRSGGGGGPAAAAGQSTSGGGGGEEEEEDMTRTTAAAAVVEVRQHVQEGSLISLDVVLICSAARPVKFHDVITVLEEEGADIISANFSLAAHNFYYTIYSRAFSSRIGIEASRISERLRALYTALATWSKDTYIAPTSKFGVGSGVELSSPWVPVWSDAAAGGGGGDARSEDRWMNRRKRLVPCGGGGGYIVVGNREKPAPCGGASCFVVGVRDVTVLMNRQKKLAPCGSVSGFVIGVREVAAPFLETAAAAS
LOC_Os01g01870	MKSRKNSTTSTKAAGSCHTSSSGGGGGGGNCYSSSSSKMERKDVEKNRRLHMKGLCLKLSSLIPAAAPRRHHHHYSTSSSSSPPSSTKEAVTQLDHLEQAAAYIKQLKGRIDELKKRKQQAAALTTSTSNGGGGGMPVVEVRCQDGTLDVVVVSEAIREERERAVRLHEVIGVLEEEGAEVVNASFSVVGDKIFYTLHSQALCSRIGLDASRVSHRLRNLLLQY
LOC_Os01g02110	MMAAQASSKRGMLLPREAVLYDDEPSMPLEILGYHGNGVGGGGCVDADYYYSWSGSSSSSSSSVLSFDQAAVGGSGGGCARQLAFHPGGDDDDCAMWMDAAAGAMVENTSVVAGGGNNYCHRLQFHGGAAGFGLASPGSSVVDNGLEIHESNVSKPPPPAAKKRACPSGEARAAGKKQCRKGSKPNKAASASSPSPSPSPSPSPNKEQPQSAAAKVRRERISERLKVLQDLVPNGTKVDLVTMLEKAINYVKFLQLQVKVLATDEFWPAQGGKAPELSQVKDALDAILSSQHPNK*
LOC_Os01g06640	MAECQPLQLQEGKKLQELQPYDGCNPSVYRGPILLPRQANSAPPAVPPEMSSSSGSGRSATEARALKIHSEAERRRRERINAHLTTLRRMIPDTKQMDKATLLARVVDQVKDLKRKASEITQRTPLPPETNEVSIECFTGDAATAATTVAGNHKTLYIKASISCDDRPDLIAGITHAFHGLRLRTVRAEMTSLGGRVQHVFILCREEGIAGGVSLKSLKEAVRQALAKVASPELVYGSSHFQSKRQRILESHCSIMSI
LOC_Os01g09900	MDSGGWIVHGYTNGATATGAGNHGFTCGYAASSCGSWEFEQREQQFISSQIQHRLNEISMHLSMDDDDDQSAVYGVAMVDDLLTPSPSTHHAVAAAAGSFPSSSSSSASFRSASVSYSPDTSSSAAAAAATGFYPELSSQVAPLLPPPPLVRNEPQPGRYTAGLPPPPPPPVTGGAFRRYARHLGPRRAPKPGACGQRMFKTAMSALAKMHMETTYRRRQYYYQQAAAAAEAAPPPPSGNNQLQHTMSERKRREKLNDSFVALKAVLPPGSKKDKTSILIRAREYVKSLESKLSELEEKNRELEARLSTRPDDTKNDEEEVAAPPEAGGEVKREDPVEIEALDNFFIR
LOC_Os01g09930	MDSSSWIHGYTNANATGANSGFMCGYAASPVEFPQQQQLISMQMGMDDESAVYDGASMVGDLLMASSSAHHAGAGSFQYSSSTTSSSASFRSASVSCNPESSAAAAPELPAATGGAFSRYARHLRPRRPPKPGACGQRMFKTAMSVLANMHVAATYRRQYYYQQAAAAAAAEAAPAPPSDNQLQHMISERKRREKLNDSFVALKAVLPTGSKKDKASILIRAREHIKSLESKLSELEEKNRELEARLASRPAAKNDKGETAAAEAGDETKREDLVEIEVTTTSGGSGAAAAAATGGDQETCCTLNVDLRGGGGGGMSTTDVVLRTLQCLREQIGDGASLVAMSTSAGSGGRPPSANLTLQLKSPTYGRCSYKYEFTLFLVNRQKPTIKHIRYGSRKISM…
LOC_Os01g09990	MEDCSSWIHGYANANATAGNNGFMCGYAASCSPVEFQQQQQLVGSQIEHHLNQISMQMGMDDESAVYDGASMVDVLLMASSSPHHHAGAGSFQYSSPTSSSASFRSASVSCSPESSAAATTHFLGPPAPSAAAAGFHYPEVSSQAPLPLPLPPYEPQHGQYTTVLSPPPPAPELPATTTPATGGAFRRYARHLRPRRLPKPGGCGQRMFKTAMSVLTKMHVAATYNRQYYYQQAAAAAASASAAEAPPSGNQLQHMISERKRREKLNDSFLALKAVLPPGSKKDKTSILIRAREYVKSLESKLSELEEKNRELEARLASRPAAAAKNDKGETAAAPAPEAGDETKRKDLVEIEVTTSGGGAGAADAAAAAGGDQETCTLNVDLRGGGGGGGMSTTDVVL…
LOC_Os01g11910	MGSAPFGDAVAGGGLYEYQGYHGGFAGGHGLGQPAGRAPALDDGETEGMDASAAAAVAAMEMAKRNCGGGREEKAAMALKSHSEAERRRRERINAHLATLRTMVPCTDKMDKAALLAEVVGHVKKLKSAAARVGRRATVPSGADEVAVDEASATGGGGEGPLLLRATLSCDDRADLFVDVKRALQPLGLEVVGSEVTTLGGRVRLAFLVSCGSRGGAAAAAMASVRHALQSVLDKASSGFDFAPRAASLLGSKRRKVSTFESSSSSS
LOC_Os01g13460	MVMKMEADEDGANGGTGGTWTDEDRALTASVLGTDAFAYLTKGGGAISEGLVAASLPVDLQNRLQELVESDRPGAGWNYAIFWQLSRTKSGDLVLGWGDGSCREPHDGEMGPAASAGSDEAKQRMRKRVLQRLHSAFGGVDEEDYAPGIDQVTDTEMFFLASMYFAFPRRAGGPGQVFAAGVPLWIPNTERNVFPANYCYRGYLANAAGFRTIVLVPFETGVLELGSMQQVAESSDTLQTIRSVFAGAIGNKAGVQRHEGSGPTDKSPGLAKIFGKDLNLGRPSAGPGTGVSEADERSWEQRTGGGSSLLPNVQRGLQNFTWSQARGLNSHQQKFGNGILIVSNEATPRNNGGVDSSTATQFQLQKAPPLQKLPQLQKSHQLVKPQQLVSQQQLQPQAP…
LOC_Os01g18870	MYHPQCELLMPLESLEMDVGQSHLAAAVAAAMPGELNFHLLHSLDAAAAAASSTAASASSQPTVDYFFGGADQQPPPPAAMQYDQLAAPHHHQTVAMLRDYYGGHYPPAAAAAAATEAYFRGGPRTAGSSSLVFGPADDESAFMVGPFESSPTPRSGGGRKRSRATAGFHGGGPANGVEKKEKQRRLRLTEKYNALMLLIPNRTKEDRATVISDAIEYIQELGRTVEELTLLVEKKRRRREMQGDVVDAATSSVVAGMDQAAESSEGEVMAAAAMGAVAPPPRQAPIRSTYIQRRSKETFVDVRIVEDDVNIKLTKRRRDGCLAAASRALDDLRLDLVHLSGGKIGDCHIYMFNTKIHSGSPVFASAVASRLIEVVDEY
LOC_Os01g33400	MYHPQCELLMPLESLEMDVGQSHLAAAVAAAMPGELNFHLLHSLDAAAAAASSTAASASSQPTVDYFFGGADQQPPPPAAMQYDQLAAPHHHQTVAMLRDYYGGHYPPAAAAAAATEAYFRGGPRTAGSSSLVFGPADDESAFMVGPFESSPTPRSGGGRKRSRATAGFHGGGPANGVEKKEKQRRLRLTEKYNALMLLIPNRTKEDRATVISDAIEYIQELGRTVEELTLLVEKKRRRREMQGDVVDAATSSVVAGMDQAAESSEGEVMAAAAMGAVAPPPRQAPIRSTYIQRRSKETFVDVRIVEDDVNIKLTKRRRDGCLAAASRALDDLRLDLVHLSGGKIGDCHIYMFNTKIHSGSPVFASAVASRLIEVVDEY
LOC_Os01g38610	MDRGFNEMILSESVWNGGGGGGDGDGGAVVLPPEVGGVNAVDGSGMTMLERLVLDEALAAAILELQGIQAPGCGGGGGKVAVVPPPTAGDGGVEAAVAFAAMATGTPAYADVDADVLQRQRQHHHRHQGAMGMAAEYDVAPATPAVTLSAVPPPPPPPAFATAAASVDGGGAMDATVFSGIGNDDVVDAVSATVAMTTATATTSQCERVRGGGGGGGCGRKQRRPGRKRKAAEPTAAAAAADMSSQDNPLCSLLASNTAGADGGIQIAFSTSAPASKRAKPSLSSSSSSISFDGRGPGGNCGGGGGDDPLYEPDTEALAQVKEMIYRAAAMRPVTLGAEDAGERPRRRNVRISSDPQTVAARQRRERISERLRVLQKLVPGGAKMDTASMLDEAANYLR…
LOC_Os01g39330	MDEVWCSLDSMPADIAAGIHQPPPPDLHDPSFWPAFADCAASFIAGGGGDNACFDELMAGGSSGDTRMVAMDDGDDGSGFLVGDAEAEHLMLSSSSPSSLSSGRSLSIDSAGSMSSFSLDAAAALAMSTLAVPHPYPPPVAHGMFASGDGGGGGGGAVDDHEDAIMRAMMAVISSASASPSSSGGSASSPTPFSRDSGAHHQPAGQPAMAAPQQPRGGNGGHVVVKSSSSSGGLAVPMDQKPGGGGRGRQQEEAAAASATNSSQLYHMMSERKRREKLNDSFHTLRSLLPPCSKKDKTTVLINAAKYLKSLETEITELEGTNTKLEKHIAGGGGAADAAMRARRAQQRAKVQISKAADSQSQQLVSLTVMVMVECDVVELVLHILECLRWMKEISVLSV…
LOC_Os01g39480	MVPEEPNVVNRITTAFWEFQLLACSDEPISSGTPSSPSSPLTKETGDANTVLIDDLFLAHSDAILAGGDQEDHQLGNDLGQQQAATAMEIDDDMIYSLIRNWDNDSSSSWIELLDHVVVSPASCFVPWKRTELDKQAVAGGGEAAQRLLKKAVGGGGAWMNRAAGSSIKNHVMSERRRWEKLNEMFLTLKSLVPSIDKVDKASSLAETIAYLKELERRVQELESGKKVSRPAKRKPCSERIIGGGDAGAVKEHHHWVLSESQEGTPSNVRVIVMDKDELHLEVHCRWKELMMTRLFDAIKSLRLDVLSVQASAPNGLLGLKIRAKVVSLT
LOC_Os01g39580	MSRVPTSWGFVYSRVNKVSEEPNVVNRITTAFWELQLPACSDEPISSGTPSSPSSPPTKETGDANTVVIDDLFLAHSDAILPAGGDQKEEHQLGDDLGQQQAATAMEIDDDVIYSLIRNWDNDSSSSWIELLDHAIVSPASCFVPWKRTELDKEAVAGGEAAQRLLKKVVGGGGAWMNRAAGSCSIKNHVMSERRRREKLNEMFLILKSLVPSIDKVDKASILSETIAYLKELERRVQELESGKKVSRPAKRKPCSETIIGGGGGGGGAGAVKEHHHWVLSESQEGTPSDVRVIVMDKDELHLEVQCRWKELMMTRVFDAIKSLRLDVVSVQASAPDGLLGLKIRAKYASSAAVVPAMISETLRTAVAGY
LOC_Os01g50940	MSWSETDAALFAAVLGHDAAHHLATTPPHLDAPEGSPSSAELQASLHDLVERQGGAWTYGIFWQESRGAGAASGRAARAVLGWGDGHCRDGAGHGEVGAAERSVARKRVLLRLHALYGGGDEDGADYALRLDRVTGAEMYFLASMYFSFPEGSGGPGRALASGRHAWADVDPHPSGSGSAPGWYVRSSLAQSAGLRTVVFLPCKGGVLELGSVVAIRETPEVLRAIQSAMRAVPAPPEDFMRIFGKDLSPGRPSQPMGCDAPWTPRLVVQTTPVRPAKKEVVKAKPAEPPKSLDFSKANVQEQAGGQERRPRKRGRKPANGREEPLNHVEAERQRREKLNQRFYALRAVVPKISKMDKASLLSDAIAYIQELEARLRGDAPVPARADGPAVEVKAMQDE…
LOC_Os01g51140	METFGWAGGGQLMHHDDIYLPRSVGCGRPFELDDAFLGACFGAQLQCDGGVGGGDGGGCLQGTSGFGAVAGDPLGLLCSGDVFASVAEGAGGAHDDGLLDAALAFSRNQLGGAACDGSDGGAVSNGAMLSSYSGTTGGNISSGESNNYSGGGGGYDAEVVSPTSTMSAATQSLHPKRKLYDDHHHPAGIAAAAAAPPLAPCPRPTTGAVAAKRRASTSATSITFGHQPHHHHAGATTAGYEPDMEAMAQVKEMIYRAAAMRPVHLGTEAAADKPRRKNVRISSDPQTVAARLRRERVSDRLRVLQKLVPGGNKMDTASMLDEAASYLKFLKSQVQKLETLGTTTTTSKLPQQYYSGNINSSNNHHGFLGFAANNNTISAGYANSNAGNATKLL
LOC_Os01g56690	MENDDDVEHPFYYFVHDDAAAGVDDHEELLASLGFLLPPPPPPPPPPQPDQGRSAFAAYQSTAAMASSSSSSESLSRRYHSSASNVHRRMHRFLRSIYDDAGDDAGATAEMQPAEGEQQQAAPSGGSARFRHIMRERLRRERLSQGYADLQAILPTGASSSKVLVKSLIRNYMSGGKNTIVAAAANYIRELEGRKGWLCAQNELLERTTPKPGAGMVVKVRAESELGSTVDVFEAVLRRLKAMDELQVTAIQSWFGAGGMWMDVAVESKEKED
LOC_Os01g57580	MADEWWSASQRSHGTSACSAAPSPLTADRVSCGWTSPAAAAAAESTSSITFQDPSRSSAAHHQPLSDAASSLGDPHMVDWTQAFLSGRSDASFQAVLQDDMAASTRPFRAQPTAADEAVMTNPFRDMGVGQGLLLDQASAPLHGLSFDAGEPAVAPATHSITTSFGDYQHSASYDAAAAVMQFSQTPRAPSLPAAAQMQFLSGSYQLPFGGAPPLPSQLLLQAMQPKPSCSSNANTLLAKVRKEKLGDRITALQQLVSPFGKTDTASVLHEAIEYIKFLHEQVASLSSPYLKNGNPLQHFQQKGSESTKDAEQPKPDLRSRGLCLVPVASTYTVASETVPEFWHPTFGGTFR
LOC_Os01g61480	MHDPRGFPIHPQPYHLHPTAGGLGEGRMRGGGRRRPGAKLSTDPQSVAARERRHRISDRFRVLRSLVPGGSKMDTVSMLEQAIHYVKFLKAQVTLHQAALVQHEEGCQHADVAAAFSAADADLALELNHRHGGAGDDDAGMTTLEMAPMQEAVGYGDGPAHQMMQQALDPAGQLMMGGAHQLPPLPCCVFVQETDPSCYSVCNVHGEESGAQGSY
LOC_Os01g64560	MAGAAPLRDSLRRLCTDVGWSYAVFWRATRAADSQRLKLVWGDGHYERAAGAPSISGFEAMDLLLKEKAAALRSGTGRGGGGGEGHAADGAAGHSHDRVDALVHKAMAQQVHVVGEGVIGQAALTGLHRWIVHDIVDECEEEDEVLLEMKGQFCAGIQTIAVIPVLPRGVIQLGSTKMVMEEAAFIDHVRSLFQQLGSSTAVVPCGSFVQDSIMRTPFHKSLGVPTSSHSEDLAGGGNTYNDDMINHQFRHQKSPASTIQSFNPVQQFYAGPTFCRPVTIASRCDLFQPDHGSTFTLNSQSEDNRSTALLKNSVSHSKTSNDAFSHAFNPLNEPNVSISGRRECVSIEQHGSCRNGEMEITIGRTASSSCTGKTNIINKVDDLLSQDCLVGCQASNATS…
LOC_Os01g67480	MNRMTAPHGGMPPPPMPAAGGLARYGSAPGSLLASIADSVIRGRGVGVVDQLHHHQHQHQLPPPPPPQQQQMVGRYFSAESSGLTSCESSCRTTTTTSTAAAADVGRHPLERAYGGSGEIHVDASSAAVPLFRHSSSPAGLLSRLMADPHGNGMAATRGMGGYSGGGGDAGAMAHRRLSSQWSFSRQDLPQISEMGGLIPDIGESIVTGGGGNSSSDGAGHGAQSSSFLSSRNFSMSSWDDTNSIMFSPPSSSKKARVAAAAAGDHGDDMVSSFSNIDSQFGLSKQSSLEMAGMDDFLQLQPDSVACRARAKRGCATHPRSIAERERRTRISKRLKKLQDLVPNMDKQTNTSDMLDIAVTYIKELQGQVEKLKHDQANCTCSGKHDC
LOC_Os01g68700	MNCGPPDQLPPATAPSCFLNLNWDQSMDAAAGGHLDPALSSMVSSPASNSTGALHGISPQPHYGGGTPLSSPPKLNLSMMGQFHHYAAPPQVGGGGGGGGGLPILENLMPMGHLDQFLADPGFAERAARLSGFDARGGGGGGGYGGAGPAQFGLPDAGAAGASKEMELGNTRDESSVSDPAPGGAEIPPKGASDGNARKRKASGKGKGKDSPMSTSAAKEDSSGKRCKSTEESNAAAEENSGKGKAAQSNSENGGGKKQGKDSSSKPPEPPKDYIHVRARRGEATDSHSLAERVRREKISQRMKLLQDLVPGCNKVVGKAVMLDEIINYVQSLQRQVEFLSMKLATVNPQLDFNNLPNLLAKDMHQSCSPLQSSHFPLETSGAPLPYINQPQQGNPLGC…
LOC_Os01g70310	MDEAEAAAAAAKMDELAGGGGGGGGDWSYLAADALAAASFTAFPFHHHHHHHHRDVLSASTPSSLLLNMDAATAAAMFDFQAAFPSSSVPPPPPTTTAALPPFHDFASSNPFDDAPPPFLAPPGQKLGFLGPPGGAFGGGMGWDDDDEIEQSVDASSMGVSASLENAAPVAAGGGGGGGGGGGRGKKKGMPAKNLMAERRRRKKLNDRLYMLRSVVPKISKMDRASILGDAIEYLKELLQRINDLHNELESAPSSSLTGPSSASFHPSTPTLQTFPGRVKEELCPTSFPSPSGQQATVEVRMREGHAVNIHMFCARRPGILMSTLRALDSLGLGIEQAVISCFNGFAMDVFRAEQCRDGPGLGPEEIKTVLLHSAGLQNAM
LOC_Os01g72370	MEQLFVDDPAFASSMSSLEADIFSGAGQLPSSPWLDLDLDDDVQDLSMAPTTANAVSSGYGSGGSGSHRKLSHNAYERDRRKQLNELYSSLRALLPDADHTKKLSIPTTVSRVLKYIPELQKQVENLERKKKELTTTSTTNCKPGVLGSQLMSEGMAPIVSATCINDMEIMVQVSLLSNVAGSVLPLSKCIKVLENEGLHFISSSTSSGFGNRTFYSIHLQRSEGTINEECPAFCERLEKVVRNKAKL
LOC_Os02g02480	MDGGGDPVDEFLIGGGGEDGDLGVFCDGVPTLPCDGGLGIDDVSGDTCCLDQSVLGKRGRDESSSSGPKSKACREKIRRDRLNDRFLELSSVINPDKQAKLDKANILSDAARLLAELRGEAEKLKESNEKLRETIKDLKVEKNELRDEKVTLKAEKERLEQQVKALSVAPTGFVPHLPHPAAFHPAAFPPFIPPYQALGNKNAPTPAAFQGMAMWQWLPPTAVDTTQDPKLWPPNA
LOC_Os02g02820	MDGGGDPVDEFLIGGGGEDGDLGVFCDGVPTLPCDGGLGIDDVSGDTCCLDQSVLGKRGRDESSSSGPKSKACREKIRRDRLNDRFLELSSVINPDKQAKLDKANILSDAARLLAELRGEAEKLKESNEKLRETIKDLKVEKNELRDEKVTLKAEKERLEQQVKALSVAPTGFVPHLPHPAAFHPAAFPPFIPPYQALGNKNAPTPAAFQGMAMWQWLPPTAVDTTQDPKLWPPNA
LOC_Os02g12820	MDTIFVLGQESRQRILHRAAARLPGCAYVCAWAPLPLVAAAGLHHQRPSSGGAAGAARLLYCVDGWLSGGEDGGGCVRALFDAYRGSVCGAVTGCVPGWAYVGGGGGVFMELSELELVASASLPVQQSFYQEAGIKMAAFMGCESGEIEVGFSTAPAENYGGGGGGGSLQASVEQVFSEDFFQQSLLEELLQLPPTRPSSSSSSLVGSPADGAASTSLLRTMTPMMASSSATPSPRELAAQVATTTTTTTTPSSSSRLHPRPPAPHHVHVSPFSRHGGVGGSGVLHFPSAEADDAAMAQAMLDVISSPSTSSSAAALHAPWSSVKHRAQIIRSPRRGTPTTTAFRAYNAALAPRAAASRRPPGAPGQRMIKMGFSILRRMHMVRCSQERAAAAAAAASA…
LOC_Os02g13670	MEIPPPSAGGGGGGGKPDRKTTERIRREQMNKLYSHLDSLVRSAPPTVNSIPSHSNSNSKYHQRKLRILGGAAAATTRPDRLGVAAEYIRQTQERVDMLREKKRELTGGGGGGSSSSSGAGAATAAAPEVEVQHLGSGLHAILFTGAPPTDGASFHRAVRAVEDAGGQVQNAHFSVAGAKAVYTIHAMIGDGYGGIERVVQRLKEAIRSN
LOC_Os02g15760	MADGGGGGLCELFSDDHRDIRHVADADLFRILETWEECINGGAGGGGGGVSLAGVADQGAAAASTGAGGGARTTTTTTAANGRRREGRDEEKGGGGGGGPPAQKKQKGSSSSSSSPAALAAAVGDGDGAAKMSHITVERNRRKQMNEHLAVLRSLMPCFYVKRGDQASIIGGVVDYIKELQQVLRSLEAKKNRKAYADQVLSPRPSPAAAALMVKPTPPISPRFAAAAAAGVPISPRTPTPGSPYNKHAAAAATARPPHPAAATSSCSVAYSMSPAMTPTSSSSTTTTTTHELSPAPAFLPILDSLVTELAARGGASCRPLVIPSSAAAIAGIVGVPDVRVEFAGPNLVLKTVSHRAPGQALKIIAALESLSLEILHVSICTVDDATVLSFTIKIGIEC…
LOC_Os02g23823	MDPRSSQAQEDGFFHPRDGACPADSSGKTECKTQGSIATRKVQKADREKMRRDRLNEQFQELGSTLDPDRPRNDKATILSDAIQMLKDLTSQVNKLKAEYTSLSEEARELTQEKNELRDEKVSLKFEVDNLNTQYQQRMRVLYPWTGMEPSVVIGPPLPYPFSVPVPVPVPIPSGAVPMHPQLQAYPYFRNQTSGTVSNPCTPYMAYTQPIHPPTDQLSNQFSAPVQHSSSNRSHSMAQDSRSKSSALQQVSCRGKHDDFDDVATDLELKTPGSSAPLQSEIANKDSSSDLKKKQQFIQETKGSSLTEGSSSSSRCSSSGPPDVSNSIEGGSVADDQRSTVQT
LOC_Os02g34320	MAQEGTSSNAPPAAASMGSGDGDNKEGTGESGNNQLLLPAIAASADKGKGVVAGTGNVDAKGKTTAMAPAASSTNAPNNQGGGGGGGGRSRERMHIFAERERRRKIKNMFTDLRDLVPSLTNKADKATIVGEAISFIRSLEETVADLERRKRERNSLAARCARLGLGGSSSSSAPPPPPPPAAADDTAAVMPPAPAVPPPDAAAVTAGPEPAPAPAPGTLMVWSGPSVVLNLCGGDQAFINVSVARRPGVLTMIVDVLERHSIDVVTAQIASDLSRSLFTIHTSVDRERGMFMDTATAEEIYQLAVSEIM
LOC_Os02g34370	MSQEEQRHGRQLPLATSGVITFNGVPLSPLTAGAESDGDDDDVVIVDACNNGKRKVGDGEEEGRGSQGGDDDDDVVAVHGGGGGGGNRACMFAVRERERRRRMNDMFAGIRRLVPNLPEKGEEVRMEAQKQELQRERDRLAMEVAAAAGGAGASSSSSSAAAAAVTVAAYGPAGAVGSSSSSAAAAARANTVVPVPQRAARGATAPTPRPVAPPQAGTWPLPAPAAMPPPPPPPTGAAAVAPPPSLKTWSWGDNVVVSVLGNIGNMTVRAPLRRTGVLAMASAALKRYNITAVTSLSGTDASRTQNMFMFYTIIDMPDRQPQFVHPKVFEAMYRAAAAEIAAWINCY
LOC_Os02g35660	MGGFAYPFTPSPAWSRDAVFAGSPWAAGGVSSLADALVSYGAVDDEEAAFLGKTAASSPSTARLHEQQQLLLEAELLRHGDGLGFAAMDDDGGAAMLGALEPCAMPLTDSGGPPVICSSSSNDSSGSEHSAAMPAGGGFLVGEQQQHVPPAAYAAGGVLPSMAAGEETPQSFGFGSLFNGDLLQEATVSKYHHHQQQQQLGVVPSSQPHHLNDDIDFNTGKLMSFASGQQHVTPSIDSLQIDQKEFSSGLHHLNLSSLISGPLASFNATQSHRQPAEACGGKNGGAAPFVNLSEVLPKGNGSGSAGNGAPKPRVRARRGQATDPHSIAERLRREKISDRMKDLQELVPNSNKTNKASMLDEIIDYVKFLQLQVKVLSMSRLGAAEAVVPLLTETQTESP…
LOC_Os02g39140	MMRRFLPVGGGGGGGVEPSSSSTTPQRGEAEAAGLRFGGGDISLGPHGGGGGGGGGGGGHGHQLQDGSVDLLARHSSSPAGFFSNLMASNGFPGSKGGGGSGAEAHHHPSMAGSGSGSSSGGRKMKSQLSFTAGPPHLSHIAEDGAFPDRAGAEASVPRTFSAGGSSGGGGFSIVGPWEESRDIISTLGGYESQFGGMASTSALEMAGMDRYLQLQHDQVPFKVRAKRGCATHPRSIAERERRTRISEKLRKLQELVPNMDKQTSTADMLDLAVEHIKGLQSQLQALKHEQEKCTCCSRP
LOC_Os02g46560	MSTLVDALCAPCSDTALIYDTFNASAAASFLFDNAAAFCDADILGATATGEKEATSSAAAAAAEAAPPRKKRRRRAKSCKSREETETQRMTHIAVERNRRRQMNEYLAILRSLMPEPYVQRGDQASIVGGAIEFVKELEQQLQSLEAQKRTLLPHHKARCDDATPMHNASGSNVGAGGCMEPTTTTSNCSSSVTEDAPSADAPPFAQFFAYPQYVWCHSPRDSTTTTTAASASASASASSSSPATVAAALQSEHRSGLADIEVSLVETHASVRVMSPRRPGQLLKMIAGLQALRLTVLHLNVTTLDSLVLYTLSVKVEEGCSLTTVDDIAAAVHHVLCIVDAEAAASEHLLAAGQLATTATAVAKRELATYMY
LOC_Os02g47660	MAQCGGGDVSRHRKGHLDTVESLCQGLLDDVMLDDDKCRAMFGYLQEWQDLASMCYGSLGGEPPLAPEASNGSGSSGGGGSFRKRRPDDAKGESNSICKRQRGKQQQQQQPCHPDQMAAAVGKGRPERARPGAKKKAEVASPKDSPATSASTVTAGQKTDYIHVRARRGQATDSHSLAERVRRERISERMRYLQELVPGCNKVTGKAGMLDEIINYVQSLQKQVEFLSMKIAASNPVVNFNIVEDLFGRQLSQAACNPAALPAMALPMAQVEPSCLQMSPLQQMQTSAGSSGYGLEMVVSNQYSPPGGPMSVPAGASVEPCLNVNGAAGWDIGSHGLFSGFDAPFQSVQSDCLLDNLKMEM
LOC_Os02g48060	MRMALVRERAMVYGGGCDAEAFGGGFESSQMGYGHDALLDIDAAALFGGYEAAASAGCALVQDGAAGWAGAGASSSVLAFDRAAQAEEAECDAWIEAMDQSYGAGGEAAPYRSTTAVAFDAATGCFSLTERATGGGGGAGGRQFGLLFPSTSGGGVSPERAAPAPAPRGSQKRAHAESSQAMSPSKKQCGAGRKAGKAKSAPTTPTKDPQSLAAKNRRERISERLRILQELVPNGTKVDLVTMLEKAISYVKFLQLQVKVLATDEFWPAQGGKAPEISQVKEALDAILSSSSPLMGQLMN
LOC_Os02g49480	MQLFQGEEPAHDFLSLRAGGGSSSPPFQHREEQHSSHSSRGYGMEIRRSLRPLDLAKQRGRSSGNGTAAGSAVDGASPAGSDSEEHVLPGGVGTFSIRHASGTPSREEAGSHGGVRRSAFAFAPALHGARMENAHETGGRSGSRAHRAPSTMWQDSAIDQRSIGQTPYEATRAEGRSSASSADQGPSTPRSKHSATEQRRRTKINDRLEILRELLPHTDQKRDKASFLSEVIEYIRFLQEKVQKYEEADPERNHEDSKSMPWAKVYYRSCWRNTKNTSQVQGEDLSPSTQDMNNEQYGPKHISAAQPALFNTQSVTSTTTSSSHMATGTPQNLEKNSTPSNQPPWLSMSTMRQESEPGNKMPNKHEKQTLHDENHSISSAYSQGSVP
LOC_Os02g52190	MALEAVVFPQEHLSCAAAMYAAPPSSLGCGVDMDEFEENGGVVLQEEAGVAVHGGGGGGAGGMMSLWVNAATCARSIAASGAVEEFWDERQYPVSSPPAAPTPAASGGGGGHAKAAARRRRRRPKVVKNKEEAESQRRNHIAVERNRRRQMNEYLAVLRSLMPPSYAQRGDQASIVAGAINFVKELEQLLQSLEAQKRRAEHAPPAPPFAGFFTFPQYSTTVGDNNAAGSGAADGEGGCGARPGAADIEVAMAESHANVRVLAPRRPRQLLRMVVALQCLGLTVLHLNVTTTADHLALYSFSLKMEDECRLSSVDEIAGAVNQMVTKIAGECIS
LOC_Os02g55250	MQPNARQMRGGGGGGGGGQDDFFDQMLSTLPAVWSELGSGKPAWDLTAGAVGGGGGASDDHSAAAFDDSALLASRLRQHQIDGGGDKPIMLQLSDLHRHHGLAAGDDSGGAAGFLPLSLFADRSQDDIDAAFKSPNGARGDHALYNGFGAAGMHGAAAMQPPPFGQGGSMPAQSFGGGAAASGGGGGGSASAAAAAGASSGGGAAAPPRQRQRARRGQATDPHSIAERVYHSPTTFPFSPPFFIASMPCCLRRERIAERMKALQELVPNANKTDKASMLDEIIDYVKFLQLQVKVLSMSRLGGASAVAPLVANMSSESNGNGNATSSSGNGEAANGSSNGDNNGGGTLRVTEQQVAKLMEEDMGSAMQYLQGKGLCLMPISLATAISSATSSSLLPRTG…
LOC_Os02g56140	MMDGRGSQEEEHLDLIMRHHASMGLDRCESEEALGSSESEQPTRPARPRGKRSRAAEVHNLSEKRRRSRINEKMKALQSLIPNSSKTDKASMLDDAIEYLKQLQLQVQMLSMRNGLYLPPVNLSGAPEHLPIPQMSAALDQNSAKASDPSVVLQPVNQTSGALLPFELASQHKPLFLPGVPNATALEPRFLVESSRSNLQSLRFTEPAEMIYPDEMMLKHRLTSASESTIVPGTDEKSVRQNTYMMNADRFDRYALSKDQLQHIMPKNTESVLDMPHLQR
LOC_Os03g03000	MEQWAAAAAADQAAASAGAGQMPFLALLHGAMEADGGGGGDGRKRHAAAAAFASCCPCPPVADLDLLESCVTQAAAPPVTAPATRAERRRKRPRPRPRAAPPPEKRKKPEEAENQRMTHIAVERNRRRLMNDHLASLRSLIPSNYIPRGDQATVVGGAIDYVKQLEQQLVALQAAAAERSGVGVVAAAATAASDGVFVSPQYTSYSEARGGSGVDVEATAAVGGHVRVRVAGRRWTGRLVRAVAAMEDLRLTVLHLAVTSVGHDAVVYCFNLKVKTTTTLHHLLLHVPSFF
LOC_Os03g04310	MELDEESFLDELMSLRRDGSAPWQAPPYPGGGGGGGGGGMMMSDLLFYGGDGGSAEARGGMDASPFQELASMAAPPPQHPHEEFNFDCLSEVCNPYRSCGAQLVPSEAASQTQTQLTPLRDAMVAEEETSGDKALLHGGGGSSSPTFMFGGGAGESSEMMAGIRGVGGGVHPRSKLHGTPSKNLMAERRRRKRLNDRLSMLRSIVPKISKMDRTSILGDTIDYVKELTERIKTLEEEIGVTPEELDLLNTMKDSSSGNNNEMLVRNSTKFDVENRGSGNTRIEICCPANPGVLLSTVSALEVLGLEIEQCVVSCFSDFGMQASCLQEDGKRQVVSTDEIKQTLFRSAGYGGRCL
LOC_Os03g08930	MALEAVVFPQGHFGYGCGRDSPAYGMPWCDVLAAAGGGGGFGEFYGVDEWDDQLQVASVDEWEVASKDNSDASTEGKAAAAERAEPVAAGRRKRRRTKVVKNKEEIECQRMTHIAVERNRRRQMNEYLAVLRSLMPASYSQRGDQASIVGGAINYVKELEQLLQSLEVQKSLKNRSGAMDAAGDSPFAGFFSFPQYSTSPRTGCSAAASAGSSGSASSVVMDDTAGSAESGRQSAAIADIEVTMVEGHASLKVLARRRPKQLLKLVVGLQQLRIPPLHLNVTTVDAMVLYSFSLKVEDDSKLGSVEDIATAVHQILGSIQQQEAVLSIS
LOC_Os03g10770	MEDSEAMAQLLGVQYFGNDQEQQQPAAAAPPAMYWPAHDAADQYYGSAPYCYMQQQQHYGCYDGGAMVAGGDFFVPEEQLVADPSFMVDLNLEFEDQHGGDAGGAGSSAAAAAAATKMTPACKRKVEDHKDESCTDNVARKKARSTAATVVQKKGNKNAQSKKAQKGACSRSSNQKESNGGGDGGNVQSSSTNYLSDDDSLSLEMTSCSNVSSASKKSSLSSPATGHGGAKARAGRGAATDPQSLYARKRRERINERLKILQNLIPNGTKVDISTMLEEAVHYVKFLQLQIKLLSSDDMWMFAPIAYNGVNVGLDLKISPPQQQ
LOC_Os03g12760	MSTLSNKVSLSSNLLNLQTGLAEEPEELTYMYHQEEHARMQEQFAGTPLVEQPVRFDQFYPASMAPNQFHPSHCSSFPAFGGSSALPSLAFGAVATTKKEQVQQPSPSSSNVLSFAGQVQGSTTTLDFSGRGWQQDDGVGVFQQPPERRSRPPANAQEHVIAERKRREKLQQQFVALATIVPGLKKTDKISLLGSTIDYVKQLEEKVKALEEGSRRTAEPTTAFESKCRITVDDDDGGSASSGTDDGSSSSSSPTVEASIHGNTVLLKICCKERRGLLVMILSELEKQGLSIINTSVVPFTDSCLNITITAKARLALPVYYS
LOC_Os03g12940	MKLRLRSMDQRGGAGGAAETHRVQLPDTATLSDVKAFLATKLSAAQPVPAESVRLTLNRSEELLTPDPSATLPALGLASGDLLYFTLSPLPSPSPPPQPQPQAQPLPRNPNPDVPSIAGAADPTKSPVESGSSSSMPQALCTNPGLPVASDPHHPPPDVVMAEAFAVIKSKSSLVVGDTKREMENVGGADGTVICRLVVALHAALLDAGFLYANPVGSCLQLPQNWASGSFVPVSMKYTLPELVEALPVVEEGMVAVLNYSLMGNFMMVYGHVPGATSGVRRLCLELPELAPLLYLDSDEVSTAEEREIHELWRVLKDEMCLPLMISLCQLNNLSLPPCLMALPGDVKAKVLEFVPGVDLARVQCTCKELRDLAADDNLWKKKCEMEFNTQDTCGCMMC…
LOC_Os03g15440	MGAHGDHRHHHHHQEAGVLVDEEEEEVIEQACGGPTSGVVEQEVGGDGGGVCQDAAGMVFEATSSVGSVSATMGPPPIMCWPPPAQPVHGAIHHHHNLGGGGGQQSPFFPLLPPLPPQPPPPPPFFADFYARRALQYAYDHSGGASSSSDPLGLGGLYMGHHGSHVAGMMMPPPFAPSPFGDLGRMTAQEIMDAKALAASKSHSEAERRRRERINAHLARLRSLLPNTTKTDKASLLAEVIQHVKELKRQTSEITEEACPLPTESDELTVDASSDEDGRLVVRASLCCDDRTDLLPDLIRALKALRLRALKAEITTLGGRVKNVLVVTGDDSAAAAACAGTDGDGEQQEEAMQAPMSPQHTVASIQDALRAVMERTASATEESGGSGAGGGLKRQRTTS…
LOC_Os03g17130	MVIASNKHELMKYLSLTLERFRLQKQQLCRWIRHDDLDMLTDELERKRYRTLILMADTFLANDLRQFPSAKRKASLYTSTLANIFILMLKGSTGIQLLSLFSGYMKDDVSSAVETQLAESCRLESGVETCRLLVSSVAVKCEASNSPSTTVGFDRMIAADYDLFHHMSFSPSLQNLQSPTFFTTRSSESYLGESSIYGGGARPALAQFSYSQPIAATSAAHLVRWTAAGEPMTGDGGFRSSKRLKTATTATTQPPRHGVKCHAKPRNQTTKATCKKRSQKLGDRITALQQLVSPYGKTDTASVLHEAAACIRQLHQQIQILTAPYPGTSSSSASSQQQDAGGGGGTATELRRRGLCVAALSPAVVSLAAEGGRRRTDVEDQKRIWFSNQ
LOC_Os03g26210	MGSFLVDWFSAGNGRGRFLEEAMVPSERGDVATAIRPAAADKLVHGPISDKKCRKKVPRKVHKSEREKLKRGHLNDLFGELGNMLEADRQSNGKACILTDTTRILRDLLSQVKSLRQENSTLQNESNYVTMERNELQDENGALRSEISDLQNELRMRATGSPGWGHGATGSPLPVPPSPGTVFPSQQPMQPSPMTTSTVFPLQQPLPQPTVIEPSARQPLELKLFLEAPPAEDPEPSEDQEAPNNVARPQPRYPTEASSWPISLGLPRMEDEQM
LOC_Os03g27390	MGEKVNPWCHWSNPPWTESSANNLHPPDVSLDNTNSVALPTYLNSDGYIYSGVAASMPSIAASVTDRPVSFSSRFVTTLVPSVGLSTAETLRKRPLVFFHNVNNTFTVGPLLSKGTLDTVPELQGSNETNVTDVGAQNTECMHENTEEIDALLCSDSDEGCLKVQELNNRVRKYPMQNDTMSVESVASAGASQPAKKRRLSSGTDRSVVDTASSARPDHSVDQKHLSHDDDAQSCCIGEVESDHQFALREGEEAEGDDGPDDRKRRRERIQETVAALRKIVPGGIAKDATAVLDEAICYLKYLKLKVKTLGAVSL
LOC_Os03g42100	MESGGVIAEAGWSSLDMSSQAEESEMMAQLLGTCFPSNGEDDHHQELPWSVDTPSAYYLHCNGGSSSAYSSTTSSNSASGSFTLIAPRSEYEGYYVSDSNEAALGISIQEQGAAQFMDAILNRNGDPGFDDLADSSVNLLDSIGASNKRKIQEQGRLDDQTKSRKSAKKAGSKRGKKAAQCEGEDGSIAVTNRQSLSCCTSENDSIGSQESPVAAKSNGKAQSGHRSATDPQSLYARKRRERINERLKILQNLVPNGTKVDISTMLEEAMHYVKFLQLQIKLLSSDEMWMYAPIAYNGMNIGIDLNLSQH
LOC_Os03g43810	MNQFVPDWSNMGDASRTLGEDDNLIELLWCNGHVVMQSQNHHRKLPPRPPEKAAAAAVQEDEAGLWFPFALADSLEKDIFSDLFYEAPVAATAEAAPAGPGAGADGEGKTCKGDAAMAEEERGGPGAASEAPRELMPPPKSTNASCSRQQTMSLADGGDNAGDLSELVRARRSSGGAARRKAEAGGGGGGASSSMLSAIGSSICGSNQVQVQQRTASEPGRRGAPPSAVGSANAIPCGGRDHGHGHEATTVASSSGRSNCCFGTTTTTEPTSTSNRSSKRKRLDTTEDSESPSEDAESESAALARKPPAKMTTARRSRAAEVHNLSERRRRDRINEKMRALQELIPHCNKTDKASMLDEAIEYLKSLQLQLQMMWMGSGMAPPVMFPGVHQYLPRMGVG…
LOC_Os03g46790	MDDSSLFLHWAVSTLQHQHPAAVAVVADDDATFFSFQELCDTEEVVVVPVQEEVITEAHGGGASRIGLAVAVDEHGGWSRSPNPGARPPSGGCGSNNLPLMSWDFSAASVAVQLEHVVAERKRREKINQRFMELSAVIPKLKKMDKATILSDAASYIRELQEKLKALEEQAAARVTEAAMATPSPARAMNHLPVPPEIEVRCSPTNNVVMVRIHCENGEGVIVRILAEVEEIHLRIINANVMPFLDQGATMIITIAAKASSSLLY
LOC_Os03g46860	MEDSSLFMEWAMETLQHLHPLPATPPPAGGGYAGDNATFPSLQALRESSVSQNGMAPPEPTAHEGHRASNSWSSGDTDSVSGGGGGAVMEHDGWSTSPNSVRCAAGGGGGGGGGGLWPVSWNFSSAMTQPCNDQATPSNPPTTTRARYGGGGVRYLPAAVSPSPSAQTRRASSKGNGGGGSGSSSAAPYAQEHIIAERKRREKINQRFIELSTVIPGLKKMDKATILSDAVRYVKEMQEKLSELEQHQNGGVESAILLKKPCIATSSSDGGCPAASSAVAGSSSSGTARSSLPEIEAKISHGNVMVRIHGENNGKGSLVRLLAAVEGLHLGITHTNVMPFSACTAIITIMAKVEDGVSVTAEDIVGKLNTVLQQNSRNSARETKS
LOC_Os03g51580	MATQWFSNMVMDEPSFFHQWQSDGLLEQYTEQQIAVAFGQAGEADAAAAAAAMMVQQQQYAAAAAAEHRPRKAAKVNTSWDSCITEQGSPADSSSPTILSFGGHADAAAAAAFASAGQAQSAPYYGGASAAALKPKQELDAAAAPFSQARPVKRSYDAMVAADVAKAPAAAASRPASQNQEHILAERKRREKLSQRFIALSKIVPGLKKMDKASVLGDAIKYVKQLQDQVKGLEEEARRRPVEAAVLVKKSQLSADDDDGSSCDENFDGGEATAGLPEIEARVSERTVLVKIHCENRKGALITALSEVETIGLTIMNTNVLPFTSSSLDITIMATAGENFSLSVKDIVKKLNQAFKLSL
LOC_Os03g51910	MYSGQQSDQCPGPNSGKEFLEVNWDSVALHQKMGYNSGAFGFQAYPMVLEDREGLYRSPNGTFCQNIQLSDDHSSGAKRRKGIDDHIALLNPSASSRIQNVGDQQTEVSSQQERISMEEDNQKSCSKMQSKEDSSDGDGTKEDYVHVRAKRGQATNSHSLAERLRRKKISERMKLLQDLVPGCSKITGKAVMLDEIINYVQSLQRQVEFLSMKLATVNPELSFDIEQILSKQMMLSQDRHLAFYGVDPGSSALVAHFNQGIMQPEMLCNVSNPADVLQGTTIQDISTVNQIPAMWEGLQNIPHLNYNPGGAMAEGSTNNSGSMKIEK
LOC_Os03g53020	MQMESYYGAFHADEAAFFFPHHVPASPELPFGLIASPEPEPEPEQAAAEARQSAFQEYGGAVHAGAPAAAGAVTTGGTNIHRRVMDVLGRMGGGGGGGEKGEGEEMEEEEEVPQRRRRGQGADVESSRGFRHMMRERQRREKLSQSYADLYAMVSSRSKGDKNSIVQSAAIYIHELKVARDQLQRRNEELKAQIMGHDEQQPCVTVQFEVDEPSSSIDSMIAALRRLKGMSVKARGIRSSMSGNRLWTEMNVETTIAACEVEKAVEEALKEVERNQPDSDAPFPGSKGWTQTSHVQNVF
LOC_Os03g55220	MVKEEEIITEAAGARGYMEMLGLGEEAADYLMCLSPSSYLSSPAASTTTAVASPTCASYLAPHPYHHLLSFSGQDQYHGDDVFGLQYYGGDQVIPAVVPQKSSPTTECSSSVSSMSSSPTATAISSSKSPAFKKKGSRGCDQRKATAPAAATTTNKRPRVRRERLGERIIALQQLVSPFGKSDTASVLHEALGYIRFLHDQVQVLSSPYLQRLPPSARVPEQERGTPAAEEQPPALRPSDLRSRGLCLVPISCTEHVAGAGAGTGHGNGADLWSVAAGMAKATATVTAAVERSKEAAAAAAATAALLRADRPGQQLA
LOC_Os03g55550	MAVDWIWERRRREEEYNHQMSQDELQQPGQVQWTPAPEEKSEIAVQFFTAPYPCQNGQLDHGEHHALGGIGACSSVHWQPDRGTCYWPPPLSGDGGGGSGSGSSGTGEGSYIGERCYYVGEPDVPIGLNLLVGDNDGAGVVLRDAAPQAKRRTQAGHGGDLGRQKKKARVSDKRNQESMQSGSCSDNESNCSQVNRRKVDRVAGGGNGKVPARRRSATIAQSLYARRRRERINGRLRILQKLVPNGTKVDISTMLEEAVHYVKFLQLQIKVEVQIVCHDQMLSSDELWMYAPIVYNGMDLGIDLNISPPR
LOC_Os03g56950	MDGNARSAANQTKQIVTDNELVELLWHNGGVVAQPQAAQARVVSSSGRGQSASVLTGDDTETAAWFPDTLDDALEKDLYTQLWRSVTGDAFPAAAAAGPSSHHAPPPDLPPPAARPPMRSGIGSSWTGDICSAFCGSNHIPETAAQRCRDAGAALPPERPRRSSTHDGAGTSSSGGSGSNFGASGLPSESASAHKRKGREDSDSRSEDAECEATEETKSSSRRYGSKRRTRAAEVHNLSERRRRDRINEKMRALQELIPHCNKTDKASILDEAIEYLKSLQMQVQIMWMTTGMAPMMFPGAHQFMPPMAVGMNSACMPAAQGLSHMSRLPYMNHSMPNHIPLNSSPAMNPMNVANQMQNIQLREASNPFLHPDGWQTVPPQVSGPYASGPQVAQQNQIP…
LOC_Os03g58330	MAGQQPQQQGPPEDDFFDQFFSLTSSFPGAAPGGRAAGDQPFSLALSLDAAAAAEASGSGKRLGVGDDAEGGGSKADRETVQLTGLFPPVFGGGGVQPPNLRPTPPTQVFHPQQSKQGGAAVGPQPPAPRPKVRARRGQATDPHSIAERLRRERIAERMRALQELVPNTNKTDRAAMLDEILDYVKFLRLQVKVLSMSRLGGAGAVAQLVADIPLSVKGEASDSGGNQQIWEKWSTDGTERQVAKLMEEDIGAAMQFLQSKALCMMPISLAMAIYDTQQTQDGQPVKHEPNTPS
LOC_Os03g58830	MDPAPTLAAELWRTPYLGGGGGGGGGGRGLEAAASGVTEQSNGSRGGGGGGGAGRRRQREAPALEDDSSRIVSTSGGGGGGQDLTDSEAKRFKASKSSGDNSSLRTEAETDSRNASKSGDQNPPPPEPPKQDYIHVRARRGQATDSHSLAERARREKISERMKILQDLVPGCNKVIGKASVLDEIINYIQALQRQVEFLSMKLEAVNAHVNNGIEAFPPKDFGAQVYNTAPGLTFDPQTPREYAQGSTPSEWLHMQIGGTYERVT
LOC_Os03g59670	MFPVEVAAAAAAAGRMQGEAVVPMMLPPFFMDSGIWPAAAGVVDVAASAEEEAAAAAAAAQDRALAASRNHREAEKRRRERIKSHLDRLRAVLACDPKIDKASLLAKAVERVRDLKQRMAGIGEAAPAHLFPTEHDEIVVLASGGGGVGGAGGAAAVFEASVCCDDRCDLLPELIETLRALRLRTLRAEMATLGGRVRNVLVLARDAGGAGEGGDGDDDRAGYSAVSNDGGDFLKEALRALVERPGAAAGDRPKRRRVVSDMNMQAAA
LOC_Os04g23440	MEAAADMGVLLDLYWHTPHIFDLAVADSLLMDGFGGGMYGPAAAPATPAMVEKEYDESLSELYAYTSQSRYADSSSPDVVNLCSTAVASAAAAASSKNIAMERDRRKRLNEKLFALRAVVPKITKMDKASIVRDAIAHIEKLQEEERQLLDEISVLQSAAAVAATAVEDVDDSGVTMPSMKKLRSTPPLDGGGGALRVASSPPLQILEVETKETEDFYGLILQTSQSWPSDPQLQVSKVGEKTVAVSIRCAKTRGAMAKVCHAVESLYLKVVSASVAAVDGTIVHTMFVEVTN
LOC_Os04g23550	MDAEMAMGESFAYYWETQRYLESEELDSMYLPTQDDSNYESSSPDGSHSSSAPAPAAVGGDAAAAVAGSGGGMTTMMMGGGGGGGDDAGGANKNILMERDRRRKLNEKLYALRSVVPNITKMDKASIIKDAIEYIQRLQAEEQQMLREVAALESAAAASAAPAAANPFAGLGADEEHEYGHHHPSSSSERTKKVKRALSVSSISDALLAAAAPAPPVEIQELRVSEVGDRVLVVSVTCSKRRDAMARVCRALEELRLRVITANITSVAGCLMHTLFVEVDHMDSVQMKQMVEAALSQLVATGSPLSSMSY
LOC_Os04g28280	MNPTTAAAADQPSKPSAAAAARKRKSSAKPKASSSSLPTATATTNASPKRSKVAAGAGDDGDADADAAEEKPEPAKDYIHVRARRGQATDSHSLAERVRRERISERMKLLQSLVPGCNKITGKALMLDEIINYVQSLQRQVEFLSMKLATMNPQLDFDSHYMPSKDMSHMPVPAYPSSDPTTTTAFSYTGSPATADPFTVYNCWELDLHTAMQMGATTGLSQDGPIATMAPSPSPLPHHPPLHGFYGGQQQQGTTVNHMKAEP
LOC_Os04g31290	MEHHHLLLQLSPPPPPPPLPAAHLMMSPSFFDAGVFADVGGDWMEDLMHLGELFGVGVGGDDDDNGGVDGGVGGGDDRMQEWQNNCEGAGSPDHQPSCGDGDGDGDGDVSPRDGELGDGDGDNSATRKRRDRSKTIVSERKRRVRMKEKLYELRALVPNITKMDKASIIADAVVYVKDLQAHARKLKEEVAALEEARPIRPPPPSAAAQRPQRQPRRVAAAAAQLARAADAAAVTTAAAAPHGARVAHVGAAQVGEGRFFVTVECEPAAAAARGGGGGVAAPVCAAVESLSCFTVESSTVGCSPDRVVATLTLKVSEAEEDVSAISECTVKLWVMAALLKEGFRPQPTVQIS
LOC_Os04g35010	MSQEGADLSQDVDESPYHTAVVTTNNLVRSIKAEKSNSSSSSGKPVETDIGLKVASPTMFGFNTKIEGTGKNMAVKREEGEGGGRPGVSSGVSTRDTNGKGKNAMDMEHALHIWTERERRKKMKNMFSTLHGLLPKIPGKTDKASIVGEAIGYIKTLEDVVQKLETIKTERVRAHQWAAAAAAAVAANGGGEGSSHSHSQPPRHATAVTVAVAEPAPVAAAVNAQAPQKKAAAAAAPTLQTWSAPNITLTMAGVDAFINMCLPRQRASFTTVAFVLEKHQIDVVTSTISADHDKSLFSVHVRLNEASLQSTEGLTPEAKYKLAVSELMVRLAE
LOC_Os04g41229	MNPAPSRAPQRQQRGGEMSARYGGGLQFFADAPPAGVEGGAATARTFFPVPGGGGEQQPPERAMRQQHYGGGGSGAAEISLGHGHGHGGKHHFHQFGVEAKDGGGGGDQSGFLTRHNSSPPGFFSSPVMDNGFSSSARPAGSSLGEVRHGAMSSSSNNNKKMKAPLSFASSRQGSGGLSQISEDGIPDLTDSIHGAAHHHGRSEENVSTHDHVVRSFSSGGFSIGSWEDSNSIVFSTSTGKSGAHGNDDIIATLSNYESQLVAPREMAGVEKYLQMQHDQVPFRVRAKRGCATHPRSIAERERRTRISEKLRKLQALVPNMDKQTSTSDMLDLAVDHIKGLQSQLQTLKEDKEKCTCSCKQASRNRPAD
LOC_Os04g47040	MASAPPVQEEPLQPGTNHFRSLLAAAVRSISWSYAIFWSISTSCPGVLTWNDGFYNGVVKTRKISNSADLTAGQLVVQRSEQLRELYYSLLSGECDHRARRPIAALSPEDLADTEWYYVVCMTYSFQPGQGLPGKSYASNASVWLRNAQSADSKTFLRSLLAKSASIQTIICIPFTSGVLELGTTDPVLEDPKLVNRIVAYFQELQFPICLEVLMSTSPSPNETEDADIVSEGLITHNAIEEGQMVVSDECVSNANRDPITMEIDELYSIYEDLDLDMDLDLDTVRFLEDNGWPVNPSSFQLVPASSTEAVAAAAAANDVDGVANSQVSCFMAWKSAKSNEMAVPVVTGIESQKLLKKVVDCGARMSTGRGSRAALTQESGIKNHVISERRRREKLNEM…
LOC_Os04g47059	MQAIDLFGCAMLSLQIAKPFLRALLAKSASIQTIVCIPFMSGVLELGTTDPVSEDPNLVNRIVAYLKELQFPICLEVPSSTPSPDETEDADTVFDGLIEEDQMVILQGEDELGDVVVAECETNGANPETITMETDEFYSLCEELDLDLGSYQLVPTSARETVAAAAAAANDVDGVAYSHASCFVSWKRANPAEKVVAVPMTAGIESQKLLKKAVGGGTAWMSNIDDRGSVAITTTPGSNIKSHVMSERRRREKLNEMFLILKSLLPSVRKVDKASILAETITYLKVLEKRVKELESSSREPSRWRPTEIGQGKAP
LOC_Os04g47080	MEETPLPSGKNFRSQLAAAARSINWTYAIFWSISTSRPGVLTWKDGFYNGEIKTRKITNSMNLMADELVLQRSEQLRELYDSLLSGECGHRARRPVAALLPEDLGDTEWYYVVCMTYAFGPRQGLPGKSFASNEFVWLTNAQSADRKLFHRALIAKSASIKTIVCVPFIMHGVLELGTTDPISEDPALVDRIAASFWDTPPRAAFSSEAGDADIVVFEDLDHGNAAVEATTTTVPGEPHAVAGGEVAECEPNSDNDLEQITMDDIGELYSLCEELDVVRPLDDDSSSWAVADPWSSFQLVPTSSPAPDQAPAAEATDVDDVVVAALDSSSIDGSCRPSPSSFVAWKRTADSDEVQAVPLISGEPPQKLLKKAVAGAGAWMNNGDSSAAAMTTQGSSIKN…
LOC_Os04g50090	MALDTLCSAGGDVLIYDTFNASAAAAAAVVPPASFLFGNNNAGGAAGTETRVQVAAGAVPEVDQLLKQAQQPGRRKRRRRARSCKSREDAESQRMTHIAVERNRRRQMNEYLAVLRSLMPESYVHRGDQASIVGGAIDFVKELEQLLQSLEAQKRTLLMQPPPPPQQQREPKCDAADSTSAADQETPAAAAAAAAADGPPFARFFTYPQYVWCHNPAQDGGGGGGAAAENRAGVADIEVSLVETHASIRVMAARRPGQLLKMVAGLQALRLTVLHLNVTALGSLALYSISVKRFHGGKAIASLGPLGVFFLCALYLWYSTTVVEEGCGMATVDDIAAAVHHVLCIIDAEAASQMLLAGEASG
LOC_Os04g51070	MIVGAGYFEDSHDQSLMAGSLIHDSNQAPASSENTSIDLQKFKVHPYSTEALSNTANLAEAARAINHLQHQLEIDLEQEVPPVETANWDPAICTIPDHIINHQFSEDPQNILVEQQIQQYDSALYPNGVYTPAPDLLNLMQCTMAPAFPATTSVFGDTTLNGTNYLDLNGELTGVAAVPDSGSGLMFASDSALQLGYHGTQSHLIKDICHSLPQNYGLFPSEDERDVIIGVGSGDLFQEIDDRQFDSVLECRRGKGEFGKGKGKANFATERERREQLNVKFRTLRMLFPNPTKNDRASIVGDAIEYIDELNRTVKELKILVEQKRHGNNRRKVLKLDQEAAADGESSSMRPVRDDQDNQLHGAIRSSWVQRRSKECHVDVRIVDDEVNIKLTEKKKANS…
LOC_Os04g52770	MEARRPTPTRRSRSAEFHNFSERRRRDRINEKLKALQELLPNCTKTDKVSMLDEAIDYLKSLQLQLQMLVMGKGMAPVVPPELQQYMHYITADPSQIPPIRPSEPRPFQITHATQQRQSNVESDFLSQMQNLHPSEPPQNFLRPPKLQLYTPEQQRRGLASSSGHNSGWITERNSSYNFLE
LOC_Os04g53990	MGDHQMMHAAPAAMYNGGGGTTSSHGVWWSNAVGVPAAATCSTTTELAGYTAWSSALAAGYDGMVADNGGKQAKSTTTASSESPGNNSSVTFQEPASIPDPAAVAAVPQPGLAGFTDWTQPFMNNGAGLHEFLQDGHHDMSASSLMNHSSNNLALQQAGHHHELLSSFGSDLLLSPTSPYGGFQSSLLRSLMEPTAKQQQQQPALAGLQQYHQYQQQMGHAPAAAAKFAQAVGARDSLQFTNDAPFWNPSAGFGMPAAVAVAAAAAQDQASVRSAKRSSPAPPRAAATLALKTAMEGVGDSSSVITKKETAFKKPRLETPSPLPTFKVRKEKLGDRITALQQLVSPFGKTDTASVLHETIEYIKFLHDQVGALSAPYLKNGAHQVPHLKNSSPDKSKHG…
LOC_Os05g01256	MESLCGQLEHEHEQQLHQSSSSSLLPYCFLSAPEPLPVPGFPAGCSNLEEKAAAAMAAYEYESSSCSSLDPTSMPMVYSPIVLQPQECPLSFVFDNAAAAAGDNKWVPGIQGSCPCSLGSTQDMDASWGKSRKHKRSNVGLKGLEEKKARRVVLHQHDDDVKKKAKEAAGGEPPAGYIHVRARRGQATDSHSLAERVRREKISERMKMLQSLVPGCDKVTGKALMLDEIISYVQSLQNQVEFLSMKLASLSPLMYEFGPGIDMHPDVLRQLAKMPHEMVQCMGQMGSTGISLQGLGGGPTGFAQDGSSHINMVVMQVGEQGQQQGSLHQVEMSSHCFFH
LOC_Os05g04740	MLRGNDTGSDLAELLWDNGAPAPLRPPPPPPFQPFTCSAAATTSPPAHDYLFIKNLMRGGGAANHHHHDDDDDDDDDVPWLHYHPVVDDDDDADADTAPLPPDYCAALLSGLSDHLPPPAAAASRVDPDPCSSSHGAVVPSTSAAAAKQARTSGGGGGGVMNFTFFSRPLQQRPSGGETASASASAAATSTVPVESTVVQAATNRLRSTPLFSDQRMAWLHPPKPSPRAAAPPPPPPLAPTTRHRLDTAAATATVAQRLPPSEARAPDAPPPAATATATTSSVCSGNGDRRQLNWRDSHNNQSAEWSASQDELDLDDELAGVHRRSAARSSKRSRTAEVHNLSERRRRDRINEKMRALQELIPNCNKIDKASMLEEAIEYLKTLQLQVQMMSMGTGMFV…
LOC_Os05g07120	MAACQQQIWQEGKQQQHLHHGGYDDLSSVYRGTVVLPRRQGGLAPEPPPPRPSSSSGRSAAAQATAMTIHSEAERRRRERINAHLATLRRILPDAKQMDKATLLASVVNQVKHLKTRATEATTPSTAATIPPEANEVTVQCYAGGEHTAAARTYVRATVSCDDRPGLLADIAATFRRLRLRPLSADMSCLGGRTRHAFVLCREEEEEEDAAAEARPLKEAVRQALAKVALPETVYGGGGRSKRQRLMMESRYSTAVVHTHVDPQYCWYNSR
LOC_Os05g11070	MAACQQQIWQEGKQQQHLHHGGYDDLSSVYRGTVVLPRRQGGLAPEPPPPRPSSSSGRSAAAQATAMTIHSEAERRRRERINAHLATLRRILPDAKQMDKATLLASVVNQVKHLKTRATEATTPSTAATIPPEANEVTVQCYAGGEHTAAARTYVRATVSCDDRPGLLADIAATFRRLRLRPLSADMSCLGGRTRHAFVLCREEEEEEDAAAEARPLKEAVRQALAKVALPETVYGGGGRSKRQRLMMESRYSTAVVHTHVDPQYCWYNSR
LOC_Os05g38140	MSCGGAGQSGWLLEYGLVEEEIQGSDFIYMVDDPAAVSSVLLGFDVPRKEDGSGGQDNSASKKRSRPESSAPPGTKACREKLRRDRLNERFNELSAILEPGKPPRADKVSILSDAARLLSQLRAEAQKLKSSNESLQDSIKSLKAEKSELRDEKTRLKAERERLEQMLKGVGAATPAAPAPFVPHHAAAVAAAPAYHPAAFAQAGGKYVPYATSYAPPAAFWQWIPPTSLDTSKDPVMWPPVA
LOC_Os05g42180	MADEHEWWNSPCSARTGDDEAACSTADADESAVGSTPMSFGHGGQPASLSDAAASSSSSSFLLAGQHMDYWTQDFMGGRAAAAATASFDTLLQLQLQGGDAASRRLLLGDHAAAPPRHLVVPGAPYGGGGGDDTAAPPRGLSPTPYEAADNLQQQQSFPGGHHVVSNTDRLHDHHQDAGSPSPATRSSPGSPAAAKKPRIEAPSPMPTFKVRKEKLGDRITALQQLVSPFGKTDTASVLHEAIEYIKFLHDQVASLSSPYLRCGRPVQLQHQQGSHKVNGNCEGKQLDLRSRGLCLVPVASTYTVASETATEFWHPTFGGTFR
LOC_Os05g46370	MYMDAFGWSAPAAPCQPSCGPGGDDDDDVLLAAVLGASFELHSLVDGGGNGAAGAVRSDDAYGLDVDLPSHQMSLLRCQDGLSALHGDASPTAAAAAFLDSVDVLPVPAIAGATHDDGGLLDRFAFPNVAETTTVQAAASNTAFSGYSSNTTGGGNISSGESNTYTEVASTPCAVSTTTTTTALPPSKRKLPEKYPVVGTSPTTKTTTTSETAAERRSTKRGAGGSSSITFGGGCHGAGAAAALLGYGRGYEPDTEAIAQVKEMIYRAAAMRPVTLGGPASASDPSSRPPPPPQRPRRKNVRISSDPQTVAARLRRERVSERLRVLQRLVPGGSKMDTATMLDEAASYLKFLKSQLEALETLGNGNGNGNLLHHGYYTGSRNATATAATGSSNSTVLAF…
LOC_Os05g50900	MGQAGYFLCSEITASKLLTVTATRELKPPPPPRPSGRVLSRRARRRRSSVLAWRHRRCFGGLILQTWKKNHTISAVQQRSHLERFAALDEAPPPAPEETVVTGGEMVDYMLGQPPPTTPGPQSQVSFDKLTFSDVLQFADFGPKLALNQPAASDNGGGGGDDGDDDDDSYFLRFQSLPSLPAVPPPRGGAAAAHQVVDEQEGSKQTVDAGGVSESTTLVQQADGGGGRAEKAGEQGKSGRRKRPRTVKTSEEVESQRMTHIAVERNRRRQMNEYLRVLRSLMPGSYVQRGDQASIIGGAIEFIRELEQLIQCLESQKRRRLYGGDAPAPPARPVADGAVLPAPMQQPPPATPPFFPPSIPFPASSGAGDGTGAGVAKVALDLDASGGGEVGGGVREEMA…
LOC_Os05g51820	MSHIAVERNRRRQMNDHLKVLRSLTPAFYIKRGDQASIIGGAIDFIKELQTLLQSLEAQKKRRQQPQAHLISPASISASGGGSPSPTPSPRSLITSCSPTAAAGSSAGSSSSISPKDENKQQLQLVAELAACCNSPMADVEARISGANVLLRTLSRRAPPVRIIALLESLHLEVLHLNITTMDDTVLYSFVLKIGLDCHLSVDDLAMEVHQSFMPPPAAHPDNHLHS
LOC_Os06g06900	MDEQRGRGGFDELVLLHQQQEQRRRREQQQEEEEEEEVRRQMFGAVVGGLAAFPAAAAALGQQQVDCGGELGGFCDSEAGGSSEPEAAAGARPRGGSGSKRSRAAEVHNLSEKRRRSKINEKMKALQSLIPNSNKTDKASMLDEAIEYLKQLQLQVQMLSMRNGVYLNPSYLSGALEPAQASQMFAALGGNNVTVVHPGTVMPPVNQSSGAHHLFDPLNSPPQNQPQSLILPSVPSTAIPEPPFHLESSQSHLRQFQLPGSSEMVFHGEIMPKHHLSSHQESLPGNEMNSIRKESSMLNTNNFDGVSLSKEQS
LOC_Os06g08500	MQPSSRDTVAGGGGEGTQDDFFDQMLSTLPSAWADLGGGGGGAAGKSPWEVDPAAAAAASQVFDESALLASRLRHHQIGGAGGGGGEKPVMLQLSELHRQAGGGEEDGSGAFSPLPLFTDRTNVPPREEMEGGFKSPNAAAGGEHALFNGFGVHGGSGGAGQPPFGQLRRERIAERMKSLQELVPNANKTDKASMLDEIIDYVKFLQLQVKVLSMSRLGGAAGMAPLVASMSSEGNSNGSSNGGGGKASKGGTGGEGGGGGGGGGGGGTGGGMRVTEQQVAKMMEEDMGTAMQYLQGKGLCLMPISLASAISSATSSASLLSRPSIRHAGAPPQTMLDAAGPTSPAAMSNGDDPRHAKADGGAGGTQ
LOC_Os06g09370	MDYSAGSYMWPGNSGSENYNFVDGSSESYAEEGSLPPSGYFMGAGSDRSLKITENERNPTMLANGCLPYNTQAHPLSGQILPKGELPNNLLDLQQLQNSSNLRSNSIPPGVLQCNSTSGTFDAKLDTPGLAELPHALSSSIDSNGSDISAFLADVHAVSSAPTLCSAFQNVSSFMEPVNLDAFGFQGAQNVAMLNKTSLPNGNPSLFDNAAIASLHDSKEFLNGGSIPSFGTVLQALGAGGLKAAQQEQNIRNIPLPTFTSGSHLAVTDAQGPPLPSKIPPLIHDHNSEYPINHSSDVEPQANSAPGNSANAKPRTRARRGQATDPHSIAERLRREKISERMKNLQVLVPNSNKADKASMLDEIIDYVKFLQLQVKVLSMSRLGAPGAVLPLLRESQTE…
LOC_Os06g10820	MEFDMAMDMMSQEQLMHIISQLDSALASSPSPSTSPSASPPRQSPAAHVPVPPGLLNTTMVSTSRAQAAPSAPLHPVAATAAVQSSSRGIMYTTTRQGVIDAAEEEEAAAPRPRRRNARVSSEPQSVAARLRRERVSQRMRALQRLVPGGARLDTASMLEEAIRYVKFLKGHVQSLERAAAALHMHGGHAAAAGFAGDAGDAVYSCPSYYA
LOC_Os06g16400	MNEKDATDLEERSEASEHGQALSFHGGAMFLQEAQIASPAAANNALTSMANPFPIPPGLWNPPSHNMGLGETSFSSLLGMLSAGAPPPFVATPGFVDSTAGFPCYNGGNLGAMINHPFPGIHQPLGDFQNGVEPCREIEDIEIEGSKNVSQTGEKQQGDGETTHAVDSSSKELSMPGRNGGAGHDEGTRVSCSKKRKRSGQDGGVKHAEGGEQLATVGSAQKNEDDEKGEPKRSSVASGKSSGKQIKDNAGSPKEDYIHVRARRGQATNSHSLAERVRREKISERMKYLQDLVPGCSKVTGKAVMLDEIINYVQSLQRQVEFLSMKLASVNPTLDFNIERILSKDIFQCRGTTASSAFGFFPDIVHPRLHPPKYTQVGMPSIVNPTDAFGRVIHAPLGT…
LOC_Os06g30090	MAMVAGDEAMSVPWHDVGVVVDPEAAGTAPFDAGAGYVPSYGQCQYYYYYDDHHHHPCSTELIHAGDAGSAVAVAYDGVDGWVHAAAAATSPSSSSALTFDGHGAEEHSAVSWMDMDMDAHGAAPPLIGYGPTAATSSPSSCFSSGGSGDSGMVMVTTTTPRSAAASGSQRRARPPPSPLQGSELHEYSKKQRANNKETQSSAAKSRRERISERLRALQELVPSGGKVDMVTMLDRAISYVKFMQMQLRVLETDAFWPASDGATPDISRVKDALDAIILSSSSPSQKASPPRSG
LOC_Os06g33450	MGDALCDQLLLVDSDGGEFIPHHADADADDLFTILETWEGCANVVAGGAPATTTTLGSPIAAAACISGVVGGQNHQQLPEPAAAKTVPATNNKRREEEVADRDGDGDDDDGSPQKRRKCCSPESSTTDVAAATTPKTAHIAVERNRRKQMNENLAVLRSLMPCFYVKRGDQASIIGGVVDYIKELQQVLHSLEAKKQRKVYTDQVLSPRPPATVAASCCSPRPPQLSPRLPPQLLKSTPPLSPRLAVPISPRTPPTPGSPYRLLRLPPPPPPASGSNYASPAMTPTHHETAAPSLDAIAAELSAYASRQALGGGLLLPDVKVEFAGANLVLKTVSQRSPGQAVKIIAALEGRSLEILHAKISTVDDTAVNSFTVKVCTASLLLHGTAISALALIM
LOC_Os06g37410	MGRAAARLPGCLYLCLWAPAAAIAGGVQPNHLFCLDAWIGGGGGVGAGGGGGDRALELFEAYRGALCAAVSGCVPGWAYKEGAACMELTEHDLAASASLQVQQQFYHETGTKMAVFMGCDSGEIEVGLSAASATATAAVVGEMQQSILEELLQMPPPPPSPSSSSLLSLSVGSPEYSSLVRSMATSVGASAAADPSPVHGGLLAPVYGEFPGSDDDAAMAQAMLAVISTPAPPPPLWRPPRRRARSSSSPRRATAFKAYNAALSPRARPRPGAPGQRMIKTGISLLASVHMQTRSRELAAARQRDTHAAPPPPPPPPPPSSSQLHHMISERRRRERINDSFQTLRALLPLPPDSKKDKAAILASTTEYMDKLISQVSELGEKNRQLEAQLAARSGEAQW…
LOC_Os06g50900	MELDEQAFLEELFSLRRDAWEYNAMGDFFSPACAAMDGFQERHQSTTTVSVLPTFTASYEQPPPAPAAGFDCLSEVYGNAAAAFGPNAGGGGGEYGGGGDMGFLDVVEPKASMVVDGGGLGVCKVEPGLQAEGGFSAAAAAPASKKKRVEGMPSKNLMAERRRRKRLNDRLSMLRSVVPKISKVYRVLSESFCVAIGIASAREMRLDDVCVCE
LOC_Os07g05010	MDAGATARSSSSSAMMMNQKKPLLSDGELVELLWQDGGVVAHAQTRHRSSDVLARSGVTGEEETASAWFADGGGGGGGDDDALGLGMGRDIYSQLWHSFANVDGHAAGALALATPTPTPRAAARSDDVSSRLDEADLSICGSNAVVAPALPADDDDDIDAAAPREEEEEEEEGPGAARAAGASSSGGSGSGSGSYPLFKRGREELVDSLSEVADETRPSKRPAAKRRTRAAEVHNLSERRRRDRINEKLRALQELVPHCNKTDKASILDEAIEYLKSLQMQVQIMWMTTGIVPMMFPGTHQLMPPMGMGLNTACMPGAQAQGLNQMQRTTYYMNNSLPNQMPQIPSPAMNAPSVPDDMQNDNRIRGPRNPFLHCNDTLTATAQVPGLFTYGSQIAEQNE…
LOC_Os07g09590	MDPAPSLAAELWRPHHHRHHFEASSVVTDQGSGSRGGGGSGRRRPRSDAGPEDDDLSKVVSTSAASGGGGGGGQDSDAPEAKRLKPMKSSDKNDSLRTEAGTDSGNSSKAADKNATPPEPPKQDYIHVRARRGQATDSHSLAERARREKISERMKILQDLVPGCNKVIGKASVLDEIINYIQSLQHQVEFLSMKLEAVNSHMINGIVAFPSKDFGAQPYNTAAGLTFDPQTTREFAQGSTSEWLHMQIGNAYERVT
LOC_Os07g35870	MASPEGSTWVFDCPLMDDLAAAAGFDAAPAGGFYWTTPAPPQAALQPPPPQQQPVAPATAAPNACAEINGSVDCEHGKEQPTNKRPRSESGTRPSSKACREKVRRDKLNERFLELGAVLEPGKTPKMDKSSILNDAIRVMAELRSEAQKLKESNESLQEKIKELKAEKNELRDEKQKLKAEKESLEQQIKFLNARPSFVPHPPVIPASAFTAPQGQAAGQKLMMPVIGYPGFPMWQFMPPSDVDTTDDTKSCPPVA
LOC_Os07g36460	MPRRARARGGGGGGGEEVKVEDDFIDSVLNFGGGGGGEEDGDDGEEEQQQQQAAAAAMGKEFKSKNLEAERRRRGRLNGNIFALRAVVPKITKMSKEATLSDAIEHIKNLQNEVLELQRQLGDSPGEAWEKQCSASCSESFVPTENAHYQGQVELISLGSCKYNLKIFWTKRAGLFTKVLEALCSYKVQVLSLNTISFYGYAESFFTIEVKGEQDVVMVELRSLLSSIVEVPSI
LOC_Os07g39940	MAQFLGAHGDHCFTYEQMDESMEAMAAMFLPGLDTDSNSSSGCLNYDVPPQCWPQHGHSSSVTSFPDPAHSYGSFEFPVMDPFPIADLDAHCAIPYLTEDLISPPHGNHPSARVEEATKVVTPVATKRKSSAAMTASKKSKKAGKKDPIGSDEGGNTYIDTQSSSSCTSEEGNLEGNAKPSSKKMGTRANRGAATDPQSLYARKRRERINERLRILQNLVPNGTKVDISTMLEEAVQYVKFLQLQIKLLSSDDTWMYAPIAYNGVNISNIDLNISSLQK
LOC_Os07g43530	MVPRDRVNAAAAGGGGEGRLVQSGIVNKKCDKKAPKRIHKSEREKLKRDKQNDLFNELGNLLEPDRQNNGKACVLGETTRILKDLLSQVESLRKENSSLKNESHYVALERNELHDDNSMLRTEILELQNELRTRMEGNPVWSHVNTRPALRVPYPTTGVFPVQHLPHLPVTTTAAFPQQLPVIIEQHYAATPRELQLFPESATSEDSEPSQEHGISDHVTRPQPRYPTPTATLPVNLFPVFPGRQDQQCSSGTSGTNEEDRIGRS
LOC_Os08g01700	MDNMTHNSSSSSSWDLDMSLGSHHHPLLFDQPPPPPPPPPPPPLPFHLHHHPLDPSPSSSLFPPPPHHHHHAHHLHHPLDLDQRRGHHDYGGGDQGGDEELRLQQEAAAGGGGGGQDGGGGGDQDADEELGAMKEMMYRIAAMQPVDIDPATIKKPRRRNVRISDDPQSVAARHRRERISERIRILQRLVPGGTKMDTASMLDEAIRYIKFLKRQVQELQHQPGPPPPPYPAGAAPAAGPSTSAVGPPGRPFLPLGGGGPMIDWVGLTRPVDIHGPTSSSSSSSMGGALGFGFGCGGGGQSSHGMH
LOC_Os08g04390	MSGTPADGGGGGGGGGGGSGDDWFLDCGILEDLPAAACGAFPWDASPSCSNPSVEVSSYVNTTSYVLKEPGSNKRVRSGSCGRPTSKASREKIRRDKMNDRFLELGTTLEPGKPVKSDKAAILSDATRMVIQLRAEAKQLKDTNESLEDKIKELKAEKDELRDEKQKLKVEKETLEQQVKILTATPAYMPHPTLMPAPYPQAPLAPFHHAQGQAAGQKLMMPFVGYPGYPMWQFMPPSEVDTSKDSEACPPVA
LOC_Os08g08160	MYGGGAAAGGATTTTGSHGGGGGDWWSAAVSSCSAPAPETMQGFGGWSAAVVAVDGGGNTSRSAAGNTASSESPGSLATGSSITFQEPAGGVADPAAIAVHAQTVAGGGGGGWNQQPFLDGSGFHGYMSSSRNDHHTNHHHHQINTPSLMSNSSSNNGVMLQEHQHDQNYQFLSNLGFELLSSPTSPYGGGGGFRSSLLRSLTEPAAAAKPNDSPGFQQYHHHQPAMNLQPPAAAAGREPLQFTNSTAAPFWNPSSRFTVAAEGTALGGAGASPAQPTPASLAAKRALEGVGDSSSIITKKAKADSTPLKKSRTGTPSPLPTTFKACVYIYIIFNLSQMVIDFLPIKFHVRKEKLGDRVTALQQLVSPFGKTDTASVLHETIEYIKFLHDQVGALSAPY…
LOC_Os08g33590	MWEAVGGGDGTALLPWPGSAAAAPLYMPPAAAAAAPFAAGEQLPVEQPFYFDGGGGVAGHNHHPHHHQYGMEAPPPMTMMQMGGGGSSSSRMVVSGLLGTLQAELGRMTAKEIMDAKALAASRSHSEAERRRRQRINGHLARLRSLLPNTTKTDKASLLAEVIEHVKELKRQTSAMMEDGAAGGEAAAAPVVLLPTEDDELEVDAAADEGGRLVARASLCCEDRADLIPGIARALAALRLRARRAEIATLGGRVRSVLLIAAVEEEDPDEAGNDDDGEHGYGVAASHRRHELVASIHEALRGVMNRKAASSDTSSSGAGGGGGSIKRQRMISAHDQQGSFNSSGW
LOC_Os08g36740	MEFDMLNSNPEAQLELMNTMLQLEQLSAFPDHHGMVVPCSPTSPCMGAQGGHHHFSSVNHQPAHGVVSSGGANTGDGYRDQYYTQLLPAAAYSNAAGGGRGSEYHTTTTTRPASGGGGDGGVGPAAMREMIFHIAALQPVNIDPETVRPPKRRNVRISTDPQSVAARMRRERISERIRILQRLVPGGTKMDTASMLDEAIHYVKFLKTQVQSLERAAAANGHRPPPPTATSAAAATVAYPGLNGQW
LOC_Os08g37290	MVTDGECSAAAVRKGGSPAVRSHSEAERKRRQRINAHLATLRTLVPSASRMDKAALLGEVVRHVRELRCRADDATEGADVVVPGEGDEVGVEDEDDDEGERDEGCYVVGGGDRRWRRRVRAWVCCADRPGLMSDLGRAVRSVSARPVRAEVATVGGRTRSVLELDVVVASDAADNDRAVALSALRAALRTVLLNREELLAAAAAAATDGYKRPRFSPRCSSLT
LOC_Os08g37730	MALEAVVFSEGYYFGCGGAMAAEAAAGGAWSWSHGYGGGVDQGKGAMELVVDDGVVNAFWDGGGGGASSSPVMAAVSGFIEEPDGGNSSVADAAPPPEHGGASVVGRDGSAAAPAAAAGRRKRRRARTVKNREEVESQRMTHIAVERNRRKQMNEYLAVLRSLMPASYVQRGDQASIIGGAINYVKEMEQLLQSLEAHRHARRARTDAAAALPFAGFFTFPQYSMSAVPTTTTTTVAAAATENGNAVAGAGAGDDADADVSGSKPSSVADIEVTMVESHANLKVLSRRRPRQLLRMVAGLQHHRLAVLHLNVASAGHMALYSLSLKVEEDCQLTSVDDIAAAVHGIVETIEQEQQQQQKQSCS
LOC_Os08g38080	MDANGGNGFGVESNASAVHGGMAMAWQWHGGQMSGGSSCAAAPPPVQQPAMDSLAWSSTVSPSTGAATAASGAGFLLPPAAVRGGFGSFPVNSGGIVEPAGDCSSESKKRRSDEIAGTDHANASNALADSGNETECSKDVNGEVIGPPATAAAGGKSKGKGAKDAGEAQKEGYSHVRARKGQATNNHSLAERLRREKISERMKLLQDLVPGCSKVTGKALMLDEIINYVQSLQRQVEFLSMKLSAVNPRIDLDIESLVNNSKDVLRFPGQPSSAPMGFSFSTEMMPGLQLSRPGILQGGVHGMINPDVFTSLMQKQQQNDKGAFREPQMHQTLDGSFRNTAQMPYPQVMSSEELSIRQDQDGFHM
LOC_Os08g38210	MGLQGNKATHDFLSLYAAAATATDYSPLPRHPDSKPSAPAPPPAQDFFLKTHDFLPQVEKRADQTPPPPPPPPPHAAVTAEKQLLHQHALAAAGAFTINHAVAAAATAVKQEPPFAPWCQPVAAVDPRGHQWSLPFAARAVAVASSRPQQQQQQPPPPERKGGGGFMDAGSRSSGGAGFDDDDGHAARREVSSSLKELTVRVEGKGGSCSGSAGTDQMPNTPRSKHSATEQRRRSKINDRFQLLRDLLPHNDQKRDKASFLLEVIEYIRFLQEKVQKYEVSYPEWNQENAKVVPWTNIYFRSSWKNAQNKGQVPADHSPDPPELLKNGSPYMFPFTGNSDNNNAVETAAASGAQDQAETDPMSRVSYRSVDTPSPNNVADKVTSQPHAQLVRPSPAENH…
LOC_Os08g39630	MYGSPVSKDLNLPVQPPAMSSSGLLRYRSAPSTLLAEFCDDFLPPAAAPRAASPDADNVFSRFLADHQIRDKSPPATAAAAAAAAHFPDDPTMATQHHHQQQMMFQHHPQQMASVEGLYRTVSSTGIDAATAAANAAGGGGGGLLRQSSSPAGFLNHLNMDNGYGSMLRAGMAAAGGGVGFRNGANAAAAADSPGGSGGRLKGQLSFSSRQGSLMSQISEMDSEELGGSSPEGAGGGGGGGGRGYLSGYPMSSGWEESSLMSDTNISGVKRQRDSSEPSQNGGGGGGLAHQFSLPKTSSEMAAIEKFLQFQDAVPCKIRAKRGCATHPRSIAERVRRTRISERIRKLQELVPNMDKQTNTADMLDLAVDYIKDLQKQVKGLNDSRANCTCSAKHQQYSG
LOC_Os08g41320	MDGGRVGGDYISSLLSSSPRLDFGVPVLDAIVAPGGGGGGGDCGLDKLCGDPGFAERAARLSSFNNGGGGVGQRYGGAGAGLFGMPPPAPGDFAGGGSREASSVSDPASSAMKDAAANAKKRKSTAAAAAAAKGKGKEPPVGEEKESDGKRCKTGNGEKESSVKPKAEQAGSDSSVEDGGGGGQKQGKGKNAKPVEPPKDYVHVRARRGQATDSHSLAERVRRERISQRMKVLQDLVPGCNKVIGKALMLDEIINYVQSLQRQVEFLSMKLATVNPLDFSNLPTLLQKDMFQACGPSASSVFSLESSNSAFRFAEQGDVFQQFAQNSMESQCTLNQLDLALSQATNAAQYAFQDGTAGANLQQRNFWEDDLQSVFHIENGQSQENGVSAPNFHGQQQAG…
LOC_Os08g42470	MADFSPHHSLLLKATAAGAAIATTNDPNISSFFLYNHSHGSQAPQPANAAAAAIVEDASLESSVSAVLDTSPSVDRKRKAAEDSAHSKDSCKDGKSRRGKKASKEVEEKSTTEDEPPKGYIHVRARRGQATDSHSLAERVRRERISERMRMLQALVPGCDKVTGKALILDEIINYVQSLQNQVEFLSMRIASMSPVLYGFGMDSDGLHDQKIGGMFQEALAMPNPVLNQSSPAPSQAIMDTTSTTSYSLQSQHGAISFSQDNGSYLMQAVGEPRQQEMLNQLVFNNMCSFQ
LOC_Os08g43070	MDELVLSPSSFSATACFPTLDFEFCEVPDQWLLGLGHDELDKDAAASALAAAAASQSASNDDVPRNPPATTTTTKRRGRKPGPRSGGGGAPPIGHVEAERQRREKLNRRFCELRAAVPTVSRMDKASLLADAVDYIAELRRRVERLEAEARRAPLAPSAAAAAAWAAGLGAGAIGRDDLVVRMIGRDAAILRLTTAAAAARHAPARMMCAVRALNLAVQHASVARVGGATVQDVMVDDVPAALQDEARLRAALLHTLQLADTT
LOC_Os09g24490	MWEGGSHDAAAQLLPWFVGEPAAAAVGGYGGCVDVVGQGGVFGFGFEAAAAPVVTRQQRGGAAAAEGSSRGGGGKPAVVSGLLGSLQAELGRVTAREIMDAKALAASRSHSEAERRRRQRINGHLARLRSLLPNTTKTDKASLLAEVIEHVKELKRQTTAIAAAAAAGDYHGNDEDDDDAVVGRRSAAAQQLLPTEADELAVDAAVDAEGKLVVRASLCCEDRPDLIPDIARALAALRLRARRAEITTLGGRVRSVLLITADEQQQQHCDDVDDDEDGHRLLLRHGIDGAGAAADDDDECAASHRRHECIATVQEALRGVMDRRAAASSGDTSSSGGAVVAGGGGGSIKRQRMNYGVHEQCSV
LOC_Os09g25040	MAAAAAAGQISLDDLRNGGGVAANAGGGGGVHDDFLDQMLSSLPPSAWPDLAAGKAAEDDAEGMHHHHHQQQQQFGGPYDESAMLASRLRQHQISGGGGGGGGGAAAVKQMVLQQLADLRQGHHMMLQGLGGRSPAGGGGGGGDGGLLLPLTLGSGGSGGDVQALLKAAAANSAGGGDAGGVYGGGFAGSLHQQQQHFQPHPQTAPTIPTQSFGGGGGGGGGGTASGGGAAQPQAGAAGGGAPAPPRQRVRARRGQATDPHSIAERLRRERIAERMKALQELVPNANKLMQTDKASMLDEIIDYVKFLQLQVKASTYTKLLIHVLSMSRLGGAAAVAPLVADMSSEGRGGGAANGGAPAAAGSDSLTVTEQQVAKLMEEDMGTAMQYLQGKGLCLMPIS…
LOC_Os09g28210	MDFDLFNSYPESQLDLMSTMLQLEQLTALSDQSLFMAAPTSPPVSPMGTPSPQFSPPPQMSVTTTTAGGGYQDQYNSMPATYGAGAGVHQLDFAMSSPGSDSGAPQGSSSSSSSEAMREMIFHIAALQPVEIDPEAVRPPKRRNVRISKDPQSVAARLRRERISERIRILQRLVPGGTKMDTASMLDEAIHYVKFLKSQVQSLERAAAATGAAAHRAAAFGAAYPAALPMQHHAPW
LOC_Os09g28900	MVAARSGDDAELRLDVECLAAAPRWTRARRSHSEAERKRRERINAHLDTLRGLVPSASRMDKAALLGEVVRYVRKLRSEAAGSAAVVPGEGDEVVVEEEEVEVEGCSCDAGERQAARRVKASVCCADRPGLMSELGDAERSVSARAVRAEIATVGGRTRSDLELDVARTAAAGGGSNGASQLPALQAALRAVIMSQEELLAVESYKQRRFSADFA
LOC_Os09g29360	MALEAVLLSRGDLFGRRRCAMEGGGGGWSSPFSGFEGVMDLDGGNWDAAACSSMLLHGFQELEIPAAAAAAAAMAPPPPPVEPANCAENAGGVGGHQEDQAAVAAAATAVQSGRRKRRRARAAKNKEEVESQRMTHIAVERNRRKQMNEYLAVLRSLMPPSYAQRGDQASIVGGAINFVKELEQLLQSLEARKSSRQCAAHDAAAAAAPFASFFTFPQYSMSAAAAAAPVAPVVNELHGRDDGGAGTAEAEASGSKPSAVADVEVTMVESHANLRVLSRRRPRQLLRLVVALQGHRLTVLHLNMTSAGHMVLYSFSLKVEDDCQLTSVDEIATAAHQIIEKIQEEQGCSLD
LOC_Os09g29830	MLCSAGYYYALGIRSLEPRLGDSMDMSESSEKGMESNASSGPGNGIPVEWQSQFSSAFACQPSVAAQHQQHAMMDSFAAASAGLWASSDVVSAMSSAAPPRGAGFLAPVPGFLQQGLGHFPVDSGFIERAARSTCFGGGMMAGGPYGAADQAMGDAFGGTAEGLMDHHRNVGNDKAEEFAGNGHDEVPSSEVAGGDCSSKGSDSKKRRRPNEVMGTDQVHSSNLPSDSANESVHSKDKGEESSPATTNGGKSKGKGAKETSESQKEEYIHVRARRGQATNSHSLAERLRREKISERMKLLQDLVPGCSKVTGKAVMLDEIINYVQSLQRQVEFLSMKLATVNPRLDLNIEGLLSKDLLRFPGVPSSSIGFSPEMMHPQLQLSQPGLIHGGTAGMANPDV…
LOC_Os09g29930	MGIQGNKATTREHDFLSLYTTAAKDPSLQLHDAKPPPPSQGFFLRTHDFLQPLEKPTPAPTPPPTSQLQQQQQQAFPGGIGTFSISHVAGARPVAAAVVKAEPTPFVLWGQPAAAAAAHPVAALGHHHHHHQWTLPFAGVGQVAATAARQQQEWKGRVGGGGFMDSGSRSSGGAGFDDDDGVAARREVSSSLKELTVRVDGKGGSCSGSGTDQRPSSPRSKHSATEQRRRSKINDRFQILRELLPHSDQKRDKATFLLEVIEYIRFLQEKVQKFEASVPEWNQENAKILPWSNIYFRSFWKNSQSKGQNPGDDLPDPSQFIRNGSSSGYNFTGKPDDNHNMVTSAAASGAQELVETDHAASVSYRSAETPTNITNNVTSQAQAQWASPAGVDDCAMNSE…
LOC_Os09g31300	MYGAPVSKDLSLQPAGVRTPPQMSSPGLLRYRSAPSTLLGEVCGDFVLPGGGGGGGQLQLQLQQQRPGSPDHAADTVLARFLAGHGGHDNKPPRPAAHFAPPEDSMASHQQQLMYQSHQQQQQMASAMEGLYRTVSSGGTESTAAAAGNSLLRQSSSPAGFLNHLTMDNGYGNMLRAGMGGGGGGGDPRLKGQLSFSSRQGSVMSQISEMGSEDEELAGGGGSPEAGSNGGGAARGGYGGGYAMGSSAWEEPSPPATSLLPDSSLPSKRPRDDLPRQLSLPAASKNSSKPPSSASAAASPEMAAIEKFLQFQDAVPCKIRAKRGCATHPRSIAERVRRTRISERIRKLQELVPNMEKQTNTADMLDLAVDYIKELQKQVKVLNDSRSSCTCSASKQKHF…
LOC_Os09g32510	MDSDYVAGLLMSAAAAGLDLGVLDGGGGAFLETLCGGPGFAERAARLCGGGAGLFGLPAVGNAERGGCSREGSSVSDPAWAHATGGGGDNARKRKAPASAAAGKDKDAVVGGGSSPCEVGEAKAPDSKKCKAEVNPKVEEAASDGSVGDRVQKQGKGKNSSKPAAEPPKDYVHVRARRGQATDSHSLAERVRREKISQRMKVLQDLVPGCNKVVGKALMLDEIINYVQSLQQQVEFLSMKLATVNPQLDFGNLSTLLQKDMFQSCGPSVNSVFPLESAGTAFPFCDQADFFQSFGLGAMENQCSLDLANTALPHTGSTQYAFQKQVIAALKNLQSTEQMVLTCIYDDNTVCLWFSFQQRDLWEDNTFQYNDEQSQEDAVSAPNFDGQLQAADHTEIEF
LOC_Os09g33580	MAGFSHLPQQMEHGLITNNGFLFCHGSHGGAATTTAPAIPEDASMETSSVVLDTSPQDKKRKPREEDTASLNSAHSKEAKENGRKRGGKKHSRDQMEEEAPQGFIHVRARRGQATDSHSLAERVRRERISERMRMLQALVPGCDKVTGKALILDEIINYVQSLQNQVEFLSMRIASLSPVLYGFGIDSDAFSDHSQKMEGMFHEAVAIPASVLNRGSSPAQSHAIMDTSNTSPTPYTLQVQGGSNNNSLSQDNGSYIMQTVGEPRQELFNQVVLNNYMCSFQ
LOC_Os09g34330	MDELLSPCSSFSPPSPSSMFSTGAAAAAAHAVLEFTSCEVPDEWLMGDVVMAKNEEDVGGGELWPVFAGGSLSPDSELSELPRSFEAAAAQRPAKRRGRKPGPRPDGPTVSHVEAERQRREKLNRRFCDLRAAVPTVSRMDKASLLADAAAYIAELRARVARLESDARQAAAARFEPSSCGGGGNASYHGGGGGGGAAPGLDEAVEVRKMGRDAAAVRVTTTGARHAPARLMGALRSLELPVQHACVMRVHGATTVQEVLVDVPAALQDGDALRAALLQRLQDS
LOC_Os10g01530	MQQLAESLANELFNQPQEQQEEQHGYHNPSLRVLPFVGDINKPEGHTPAAAAIRDSFFSLTNGSSSSLNFSALEQQQDSGPMTKFCSPLSEMKRGGRRATSSMQEHVIAERKRREKMHQQFTTLASIVPEITKTDKVSVLGSTIEYVHHLRERVKILQDIQSMGSTQPPISDARSRAGSGDDEDDDGNNNEVEIKVEANLQGTTVLLRVVCPEKKGVLIKLLTELEKLGLSTMNTNVVPFADSSLNITITAQIDNASCTTVELVKNLKSTLRNF
LOC_Os10g23050	MALEAVVYSHGGHFGGYGGGLMGGAPAAPWDVFAAAGGGGSWDDPGLFAAEASLDVIQGVDEWEVDQDQHASSSSKVAARPPVKAAAAAGKRKRRRAKAAKNREEIESQRMTHIAVERNRRRQMNEYLAVLRSLMPPSYAQRGDQASIVGGAINYVRELEQLLQTLEARRTIKDHIDGGAGESPSPFAGFFAFPQYSTATSGHGGGGDAHSRIVVKPAETTTTAAGGGAGAAIADIEASMVEGHASVKVQARRRPRQLLKLVAGLHQLGLTTLHLNVTTVAAMAMYSFSLKVEDGCKLGSVEEIATAVHEILERMQEEQAFADAKTSL
LOC_Os10g39750	MELMDDDGSSSLLEELMAPLRRGTPTTTPEDLWLQAYPMMMSPMCGDGVMLGDLLVGGGNARNTLASPPPPSFPLPVPLTTTTPCPPLHEVSFEFDSIDCLGEVCNPYKRSGGAVRATAAAQVMVAAMDPRREAASSAVAVAAVEEEERCKARRGAGGGGDSGELAPMFVFGGGGGAAASVRPRSCRPPQPGAPSKNLMAERRRRKRLNDRLSMLRSVVPRISKMDRTSILGDTIGYVKELMDRIKNLQVEAATGDSSSSSTENLSMLKLNTLKPPPSSSSGEETPLIRNSTRFEVERRENGSTRIEMACAAIPELLPSTLAALEALGVEIEQCVISCFDDFAMQASCLQDDKKREMTRDTEEIKQTLFRSAGYGDGCLI
LOC_Os10g40740	MNQCVPSWDLDDPVGGGGIGGGGGGGHRVVSGGGGGFMPVAVPTSDQYNEVAELTWEKGNISSHGLLLNRPAPPKFPPHQQLQAAMGGGGGGGVVGDRETLEAVVGEAAARSSSSSHLAARARPVPAPWLGSVGVVAAADALVPCDADAAEGRSKRPREVVGEDGRRACASQGSAAPGRRGESTLLTLDACCGTAADDVCGFTTTTNNSTSLEDRTEDKGSPETENTSIAGGASDSRCFSRRSQSQRGGMCDEDEHVVIRGEGAMRSSISTKRSRAAAIHNESERKRRDRINQKMKTLQKLVPNSSKTDKASMLDEVIDYLKQLQAQVQVMSRMGSMMMPMGMAMPQLQMSVMAQMAQMAQIGLSMMNMGQAGGYAPMHMHTPPFLPVSWDAAASSSSA…
LOC_Os10g42430	MWVLLSPLLTTKNPFHPIPIPTFPLLLFSSSLVGVLFQIKSNLEEEEIEIKSMNLWTDDNASMMEAFMASADLPAFPWGAASTPPPPPPPPHHHHQQQQQQVLPPPAAAPAAAAFNQDTLQQRLQSIIEGSRETWTYAIFWQSSIDVSTGASLLGWGDGYYKGCDDDKRKQRSSTPAAAAEQEHRKRVLRELNSLIAGAGAAPDEAVEEEVTDTEWFFLVSMTQSFPNGLGLPGQALFAAQPTWIATGLSSAPCDRARQAYTFGLRTMVCLPLATGVLELGSTDVIFQTGDSIPRIRALFNLSAAAASSWPPHPDAASADPSVLWLADAPPMDMKDSISAADISVSKPPPPPPHQIQHFENGSTSTLTENPSPSVHAPTPSQPAAPPQRQQQQQQSSQA…
LOC_Os11g06010	MAVGDALRRLCEEVGWSYAVFWKAIGAADPVHLVWEDGYCGHASCPAGSDPSEALPTDVGCAAAADTMTMCSLVNKVMASQVHVVGEGTVGRAAFTGNHQWIIHGTANDHGIPSEVAAEMSYQFRVGIQTIAIIPVLPRGVLQLGSTGVVLENKSFMTHAKKLCSQLNNRSSMAVSSSVKNSSSQQGRSRPLHGASNVQSTENRSKLFSQFPVTCEQYNHPDTMAVSGSTSLNACMNGSLLKIAQLNGQAVREHIVYSKPDVRFIQQVYRDGQLGSNAQSIAMSSDLISSSLRSVQKQPLLMNNISQLEYGDGAETSADLRKNVLLKPPVCLDPFIHDRNINISHGITEVSNVINDHGNFDFLSGGARVVRANLCTSATSQVLDRRSHSVSGMLLHREP…
LOC_Os11g15210	MYDDNGAADLPTSQSASIKTIVCVPFIMHGVLELGTTDPVSEDPALVDRITASLWDTPPRAAFSSEAGVADIVVFEDLDHGNTAVEATTTMVPGEPEPHAVAGGEVAECESNAHNDLEQITMDDIGELYSLCEELDVLDDDSSSWVADPWSSFQLVPTAEATDVDDAVVAALGAIDGSCRPSPSSFVAWKRTPDSDEVQAVPLISGEPPQKLLKKAVAGAGAWMNNADGSAATMTTDQGSSIKNHVMSERRRREKLKEMFLILKSVVPSIHKVDKASILAETIAYLKELEKRVEELESSSQPSPRPMETTRRRCCKSTGKKVSAGARAKRKAPAPEDTDGERRHCVSNVNVTIMDNKELLLELQCQWKELLMTRVFDAIKGVSLDVLSVQASTSDGLLG…
LOC_Os11g25560	MAHDGFLGGGGGSFHAMAAWPLPFDAAAALHGGGWDSDPALGELVPSPVGVGVGGGVHKAALMDELASRLGGVCGGGLGGGGVPSPPSSSRYASCYSTPVGSPCKPAPAPPVPSLLAAADAMIAERAARMSCLAAAGHGGGKLSRAASSQSLLAETAAAGGVHQLPASDGSSSDAPCRKRKAPCAKARGKDAATTIAKVLRLLSAPPLQSRRRTSPETMVNFPQSPEPGTKAKKCKLSADAAGDEDTKPVAGDAGHGGNGKGKVLDAAGEPPKDYIHVRARRGQATDSHSLAERVKAAGIDAANHNFFFSSILAFADAIAAVFHLQVRREKISERMKLLQDLVPGCNKVAKFSQKINLNFTLVTGKAVMLDEIINYVQSLQRQVEFLSMKLSTVNPQLD…
LOC_Os11g32100	MLPRFHGAMWMQDDGGGDQEHGQAAPPGQEQHHHDQHLMALAAAAAGGAGFGAAQAPAPLLDEDWYFDAAGGGGGGAHGSMMLGLSSVHGGIGAGTSGGGHGQQFSLLNMGAAAAPFDVSGFDLGIACGGVGGGGDVVSFLGGGNASNTALLPVGNAGFLGTFGGFGTAASQMPEFGGLAGFDMFDAGAVNTGGSSSSSSAAAAAASASAHVSNTAPFSGRGKAAVLRPLDIVPPVGAQPTLFQKRALRRNAGEDDDDKKRKAAAGAGAGALSADGADMVLDDGDDDGLSIDASGGLNYDSEDARGGEDSGAKKESNANSTVTGDGKGKKKGMPAKNLMAERRRRKKLNDRLYMLRSVVPKISKMDRASILGDAIEYLKELLQKINDLQNELESSPATS…
LOC_Os11g38870	MPQVRNQNLGMVADTESSGSLGGSSNAASDKAVDGSLDKRSQEKAPKKTHKAEREKLKRDQLNDLFVELSSMLDPERQNSGKATVLGDAARVLRDLVSQVESLRKEQSALLTERQYVGSENNELQEENIMLRAQILELHNEICARMGNNHLNQSNLAMSQPVANNGSNSATQPVPHHIWGNGPNLAMVHPTNTLSPLHNQHHQSAGASQVYASRPQELQLFPGTSVSTERERSRAGSGSTPATSSGLTDSLPGQLRLSLPQSSQEENSSGSKKGRKKG
LOC_Os11g41640	MDARCANIWSSADARSEESEMIDQLKSMFWSSTDAEINFYSPDSSVNSCVTTSTMPSSLFLPLMDDEGFGTVQLMHQVITGNKRMFPMDEHFEQQQKKPKKKTRTSRSVSSSSTITDYETSSELVNPSCSSGSSVGEDSIAATDGSVVLKQSDNSRGHKQCSKDTQSLYAKRRRERINERLRILQQLVPNGTKVDISTMLEEAVQYVKFLQLQIKLLSSDDTWMFAPLAYNGMNMDLGHTLAENQE
LOC_Os12g31430	MSTATTRLGVRRPTPAPVFDFDRLLLGSSSGGGMVGDDVVADALLGFAYDPPAHGAAALDDVLAPLPGADKRPRERGVVADGRSFRRAGAALPAPPTELVTRFVPTPPPLPPVQQQQQQQRWELPDAVFVRGAGAAEAKKGGAAASHDDHDDGRHHHHHNQAVQSAAARERRRRISSKTAELSRLIPGAARMNSTAEMLQAAARHVRLLQAQVGMLALIHSSGEAKAASSMAASREHHQMMMMRALLASGGVQERLAGEGRCLVPTSLVRAIADDDAMATSNPALSRDVNRFKDSLDQQQQQ
LOC_Os12g32400	MECSSFEAICNESEMIAHLQSLFWSSSDADPCFGSSSFSLISSEGYDTMTTEFVNSSTNVCFDYQDDSFVSAEETTIGNKRKVQMDTENELMTNRSKEVRTKMSVSKACKHSVSAESSQSYYAKNRRQRINERLRILQELIPNGTKVDISTMLEEAIQYVKFLHLQIKLLSSDEMWMYAPLAFDSGNNRLYQNSLSQE
LOC_Os12g39850	MEGGGLIADMSWTVFDLPSHSDESEMMAQLFSAFPIHGEEEGHEQLPWFDQSSNPCYYSCNASSTAYSNSNASSIPAPSEYEGYCFSDSNEALGVSSSIAPHDLSMVQVQGATEFLNVIPNHSLDSFGNGELGHEDLDSVSGTNKRKQSAEGEFDGQTRGSKCARKAEPKRAKKAKQTVEKDASVAIPNGSCSISDNDSSSSQEVADAGATSKGKSRAGRGAATDPQSLYARKRRERINERLKTLQNLVPNGTKVDISTMLEEAVHYVKFLQLQIKLLSSDEMWMYAPIAYNGMNIGLDLNIDT
LOC_Os12g40590	MMSFPYSSGDLGEATTAAAAAVDMITLDQMFRDYDASTGDDLFELVWESCGGGEIDSGAGEVQPAGVPCCRRLLPGSSPEPTSEDEMAAWLSTIVTGSGGGGGDDVAAGGDHQDPAVKKPDGEPLTEKMDKKLPTRTEERRRVKHKARRNPGYAETHGLTEKRRRSRINEKFKMLQRLVPGCDKCSQSSTLDRTIHYMKSLQQQLQAMYPTMVRPAAVYPVVQPPPAFAAGGPPAASQGGLHRHRRLMVVVSVHHRCRCFRLGRQ
LOC_Os12g40630	MEMTSYNDVDAGDMFAAADYYSAGAGGDLFDMVWPGRRRREEDNTSGCLPLSPPPPPELAVDDQLLAGGDGGGGKPVAVAVAEDDDSGERWTEDQVPTDEGICVMQKRRCKINENLKTLQQLVPVCDKSNNQASTLDKTIRYMKSLQQHAQAMSVGCSMKTAEAAGVTCPFLPPPPSSALLVIVEEGPTRPWDATARSTSAAATSFDHHHHGALIEKLLQVVQPYMLSLKTSVRENNAMVMQKPNFYHS
LOC_Os12g40710	MAAWLYPIVGGHQVAAGGWLSPEAGDDRRAAPPAPEKKQMDNMPAVASPTMNKDEASDDSGERKKKKKKASSAAGKASRHRHAAGAHNLTEKRRRFKITERFRTLQRLVPGCDNKSNQASTLDQTIQYMKSLQHQLEATSAVGSPAAAVLYPAAVHPQSYMHPPAPPPPVAGAAAPVTMAPMPAGMVLAAAPPGAAPPPGPPATMMPFGAMLPYPPYPEVLLPPPPATLYGRPPAAAPSVAARRHGSTSGGGRISKSSSSSLRKEL
LOC_Os12g40730	MWQGGGGGGASSFDQPPPPVSYHRLSPPPPAMGTTTTTLLPEQPLVDDHHLPAAAAAPPSEEEMAAWLYPIVSGHEVAGGGWRSPEAQDDRRAAPAPEKKQMEKMPAAASPTTTMNKDETSDDSGERKKKKASSAAGKSKQASPRGCRSSQPYRKSGDSIDELFTKFHRRRFKITERFRTLQRLVPGCDKSNQASTLDQTIQYMKSLQHQLKAMSVVGSPPALLYPAAVHPQSYMHPPPPPPPVTMPMHPGMVLAAPPPGAAPPPGPPAMVPFGAMLPYPPYPAVLLPPPAAATLYGRPPAPAPGVAARRHGSSGGGRISKSSSSSLCKKL
LOC_Os12g41650	MNQFVPDWNTTSMGDGFAPLGEDDGLVELLWCNGHVVMQSQAPRKPPRPEKTTAAAAAAMAEDESASWFQYPVDDVLEKDLFTELFGEMTAAGGGGGDVRRAACKEERGAVAAFQSRMMPPPWPARGKAEFGDVDDVCGVSEVVMAKMDGAAAAETVGESSMLTIGSSICGSNHVQTPPVGNGKAGAGTAGAARRAHDTATVASSSMRSRSCTAKAEPRDVAAAGVGGKRKQRGGAAMESGSPSEDVEFESAAATCSPAQKTTTAKRRRAAEVHNLSERRRRDRINEKMKALQELIPHCNKTDKASMLDEAIEYLKSLQLQLQMMWMGGGMAPPAVMFPAAGVHQYMQRMGAVGMGPPHMASLPRMPPFMAPPPAAVQSSPVVSMADPYARCLAVDHLQ…
LOC_Os12g43620	MDDSSFFMQWAMDTLHQLPSDSTAAAAYATDVAGDSGAFPSLQALRNASAAGGGGGFRDLTVQVDQVHRANSWSSSDSPGGGAATAAAGWSPHVTGGGGRGHRPMSWNFSAASAQPTTEDSGGGGGGGVVPAPLQAMETTATARAAVKKGGGGGSSSSAAAPGYVQDHIIAERRRREKINQRFIELSTVIPGLKKMDKATILGDAVKYVKELQEKVKTLEEEDGGGRPAAMVVRKSSCSGRQSAAGDGDGEGRVPEIEVRVWERSVLVRVQCGNSRGLLVRLLSEVEELRLGITHTSVMPFPASTVIITITAKASSLSNHPALLCLYICIKLPCVISS

## Sheet: Sheet2
LOC_Os01g01600	1
LOC_Os01g01840	1
LOC_Os01g01870	1
LOC_Os01g02110	1
LOC_Os01g06640	1
LOC_Os01g09900	1
LOC_Os01g09930	1
LOC_Os01g09940	1
LOC_Os01g09990	1
LOC_Os01g11910	1
LOC_Os01g13460	1
LOC_Os01g18870	1
LOC_Os01g33400	1
LOC_Os01g38610	1
LOC_Os01g39330	1
LOC_Os01g39480	1
LOC_Os01g39580	1
LOC_Os01g50940	1
LOC_Os01g51140	1
LOC_Os01g56690	1
LOC_Os01g57580	1
LOC_Os01g61480	1
LOC_Os01g64560	1
LOC_Os01g67480	1
LOC_Os01g68700	1
LOC_Os01g70310	1
LOC_Os01g72370	1
LOC_Os02g02480	1
LOC_Os02g02820	1
LOC_Os02g12820	1
LOC_Os02g13670	1
LOC_Os02g15760	1
LOC_Os02g23823	1
LOC_Os02g34320	1
LOC_Os02g34370	1
LOC_Os02g35660	1
LOC_Os02g39140	1
LOC_Os02g46560	1
LOC_Os02g47660	1
LOC_Os02g48060	1
LOC_Os02g49480	1
LOC_Os02g51320	1
LOC_Os02g52190	1
LOC_Os02g55250	1
LOC_Os02g56140	1
LOC_Os03g03000	1
LOC_Os03g04310	1
LOC_Os03g07540	1
LOC_Os03g08930	1
LOC_Os03g10770	1
LOC_Os03g12760	1
LOC_Os03g12940	1
LOC_Os03g15440	1
LOC_Os03g17130	1
LOC_Os03g26210	1
LOC_Os03g27390	1
LOC_Os03g42100	1
LOC_Os03g43810	1
LOC_Os03g46790	1
LOC_Os03g46860	1
LOC_Os03g51580	1
LOC_Os03g51910	1
LOC_Os03g53020	1
LOC_Os03g55220	1
LOC_Os03g55550	1
LOC_Os03g56950	1
LOC_Os03g58330	1
LOC_Os03g58830	1
LOC_Os03g59670	1
LOC_Os04g23440	1
LOC_Os04g23550	1
LOC_Os04g28280	1
LOC_Os04g31290	1
LOC_Os04g35010	1
LOC_Os04g41229	1
LOC_Os04g47040	1
LOC_Os04g47059	1
LOC_Os04g47080	1
LOC_Os04g50090	1
LOC_Os04g51070	1
LOC_Os04g52770	1
LOC_Os04g53990	1
LOC_Os04g54900	1
LOC_Os05g01256	1
LOC_Os05g04740	1
LOC_Os05g06520	1
LOC_Os05g07120	1
LOC_Os05g11070	1
LOC_Os05g38140	1
LOC_Os05g42180	1
LOC_Os05g46370	1
LOC_Os05g50900	1
LOC_Os05g51820	1
LOC_Os06g06900	1
LOC_Os06g08500	1
LOC_Os06g09370	1
LOC_Os06g10820	1
LOC_Os06g12210	1
LOC_Os06g16400	1
LOC_Os06g30090	1
LOC_Os06g33450	1
LOC_Os06g37410	1
LOC_Os06g50900	1
LOC_Os07g05010	1
LOC_Os07g09590	1
LOC_Os07g35870	1
LOC_Os07g36460	1
LOC_Os07g39940	1
LOC_Os07g43530	1
LOC_Os08g01700	1
LOC_Os08g04390	2
LOC_Os08g08160	1
LOC_Os08g33590	1
LOC_Os08g36740	1
LOC_Os08g37290	1
LOC_Os08g37730	1
LOC_Os08g38080	1
LOC_Os08g38210	1
LOC_Os08g39630	1
LOC_Os08g41320	1
LOC_Os08g42470	1
LOC_Os08g43070	1
LOC_Os09g24490	1
LOC_Os09g25040	1
LOC_Os09g28210	1
LOC_Os09g28900	1
LOC_Os09g29360	1
LOC_Os09g29830	1
LOC_Os09g29930	1
LOC_Os09g31300	1
LOC_Os09g32510	1
LOC_Os09g33580	1
LOC_Os09g34330	1
LOC_Os10g01530	1
LOC_Os10g23050	1
LOC_Os10g26410	1
LOC_Os10g26460	1
LOC_Os10g39750	1
LOC_Os10g40740	1
LOC_Os10g42430	1
LOC_Os11g06010	1
LOC_Os11g15210	1
LOC_Os11g25560	1
LOC_Os11g32100	1
LOC_Os11g38870	1
LOC_Os11g39000	1
LOC_Os11g41640	1
LOC_Os12g31430	1
LOC_Os12g32400	1
LOC_Os12g39850	1
LOC_Os12g40590	1
LOC_Os12g40630	1
LOC_Os12g40710	1
LOC_Os12g40730	1
LOC_Os12g41650	2
LOC_Os12g43620	1
